# Supplementary material for: The Core and Distinction of the Gut Microbiota in Chinese Populations across Geography and Ethnicity
Source: MDPI journal article supplement (doi:10.3390/microorganisms8101579), 2020-10-14

## **Detected biomarkers by LEfSe analyses**

LEfSe was used for comparing characteristic taxonomy among Han to non-Han in all groups; Hans to another Hans in different location; non-Hans to another non-Hans in different location; Hans to non-Hans in same location. Finally, biomarkers were obtained by four steps as follow.

Step 1: the Kruskal-Wallis test analyzes all features, testing whether the values in different classes are differentially distributed. Features violating the null hypothesis are further analyzed in Step 2. The significant threshold of  $pvalue \leq 0.05$  in Kruskal-Wallis test.

Step 2: the pairwise Wilcoxon test checks whether all pairwise comparisons between subclasses within different classes significantly agree with the class level trend. The significant threshold of  $pvalue \leq 0.05$  in Wilcoxon test.

Step 3: the resulting subset of vectors is used to build a Linear Discriminant Analysis model from which the relative difference among classes is used to rank the features. The final output thus consists of a list of features that are discriminative with respect to the classes, consistent with the subclass grouping within classes, and ranked according to the effect size with which they differentiate classes. The significant threshold of  $LDA\ SCORE(\log_{10}) > 2$ .

Step 4: Based on Step 3, the representative biomarkers of Hans in a certain location must be the largest or smallest in all different locations, and there are significant differences compared with other locations. Similarly, the representative biomarkers of non-Hans in a certain location must be the largest or smallest in all different locations, and there are significant differences compared with other locations.

Results as follow:

Differences are represented in the color of the most abundant class (Red and green represent different geographic location or ethnicity); LEfSe provides features that were differential among conditions of interest with statistical and biological significance, ranking them according to the effect size.

Hans to another Hans in different location: Pages 2-22

non-Hans to another non-Hans in different location: Pages 23-43

Hans to non-Hans in same location: Pages 44-50

Gansu Xinjiang

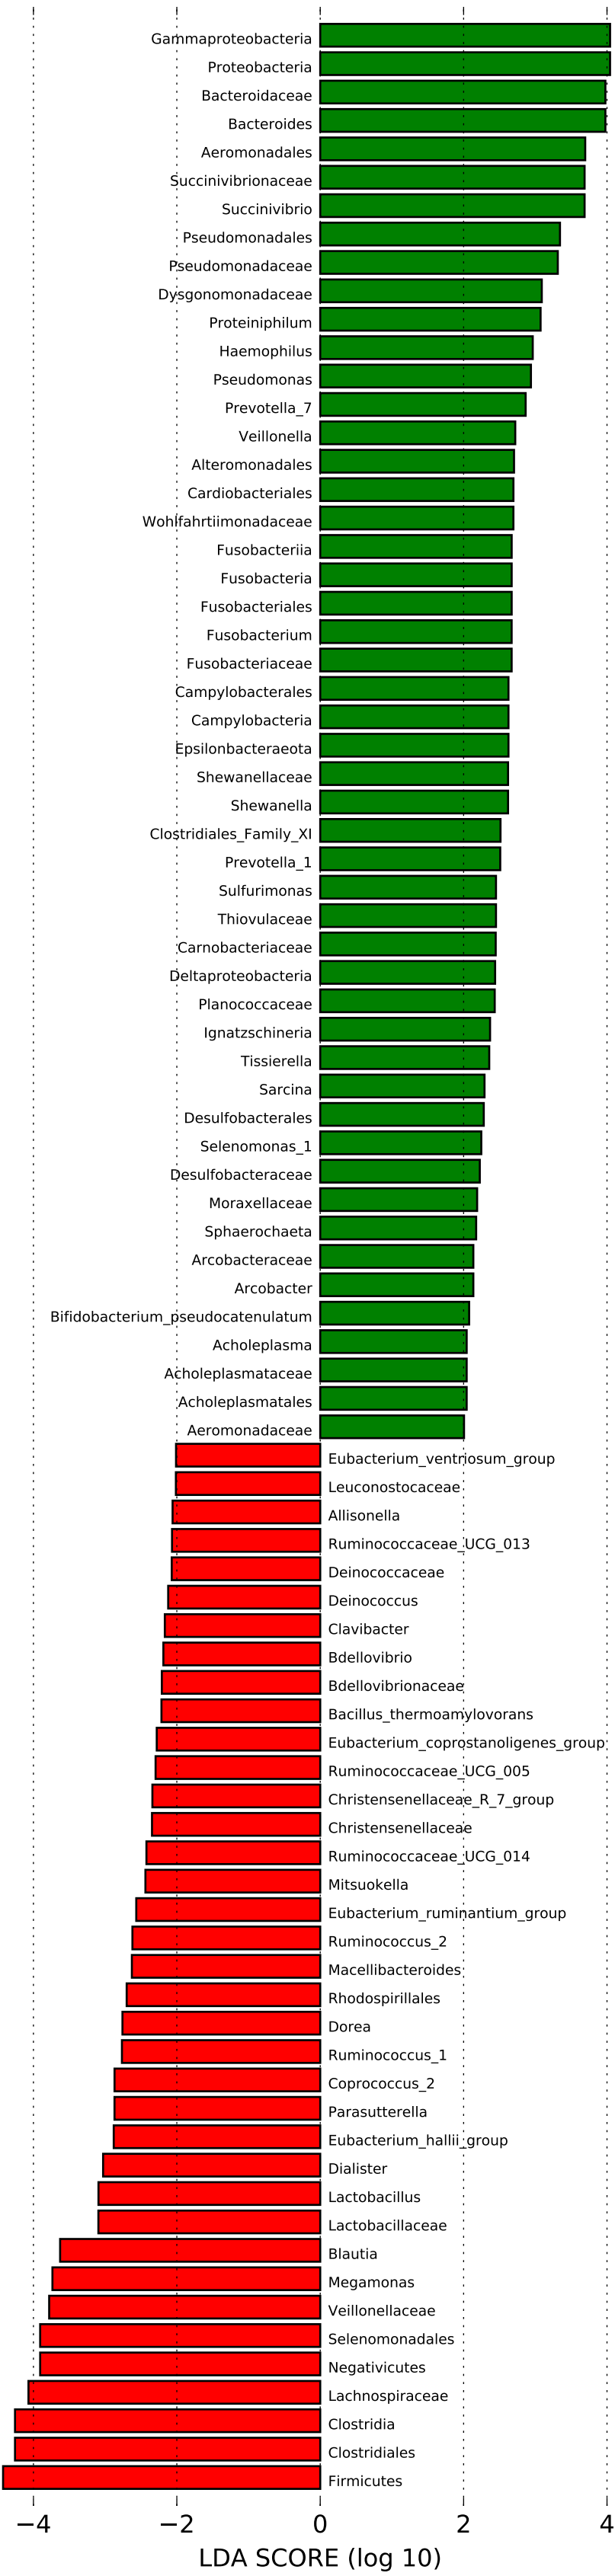

LDA SCORE (log 10)

Gansu Yunnan

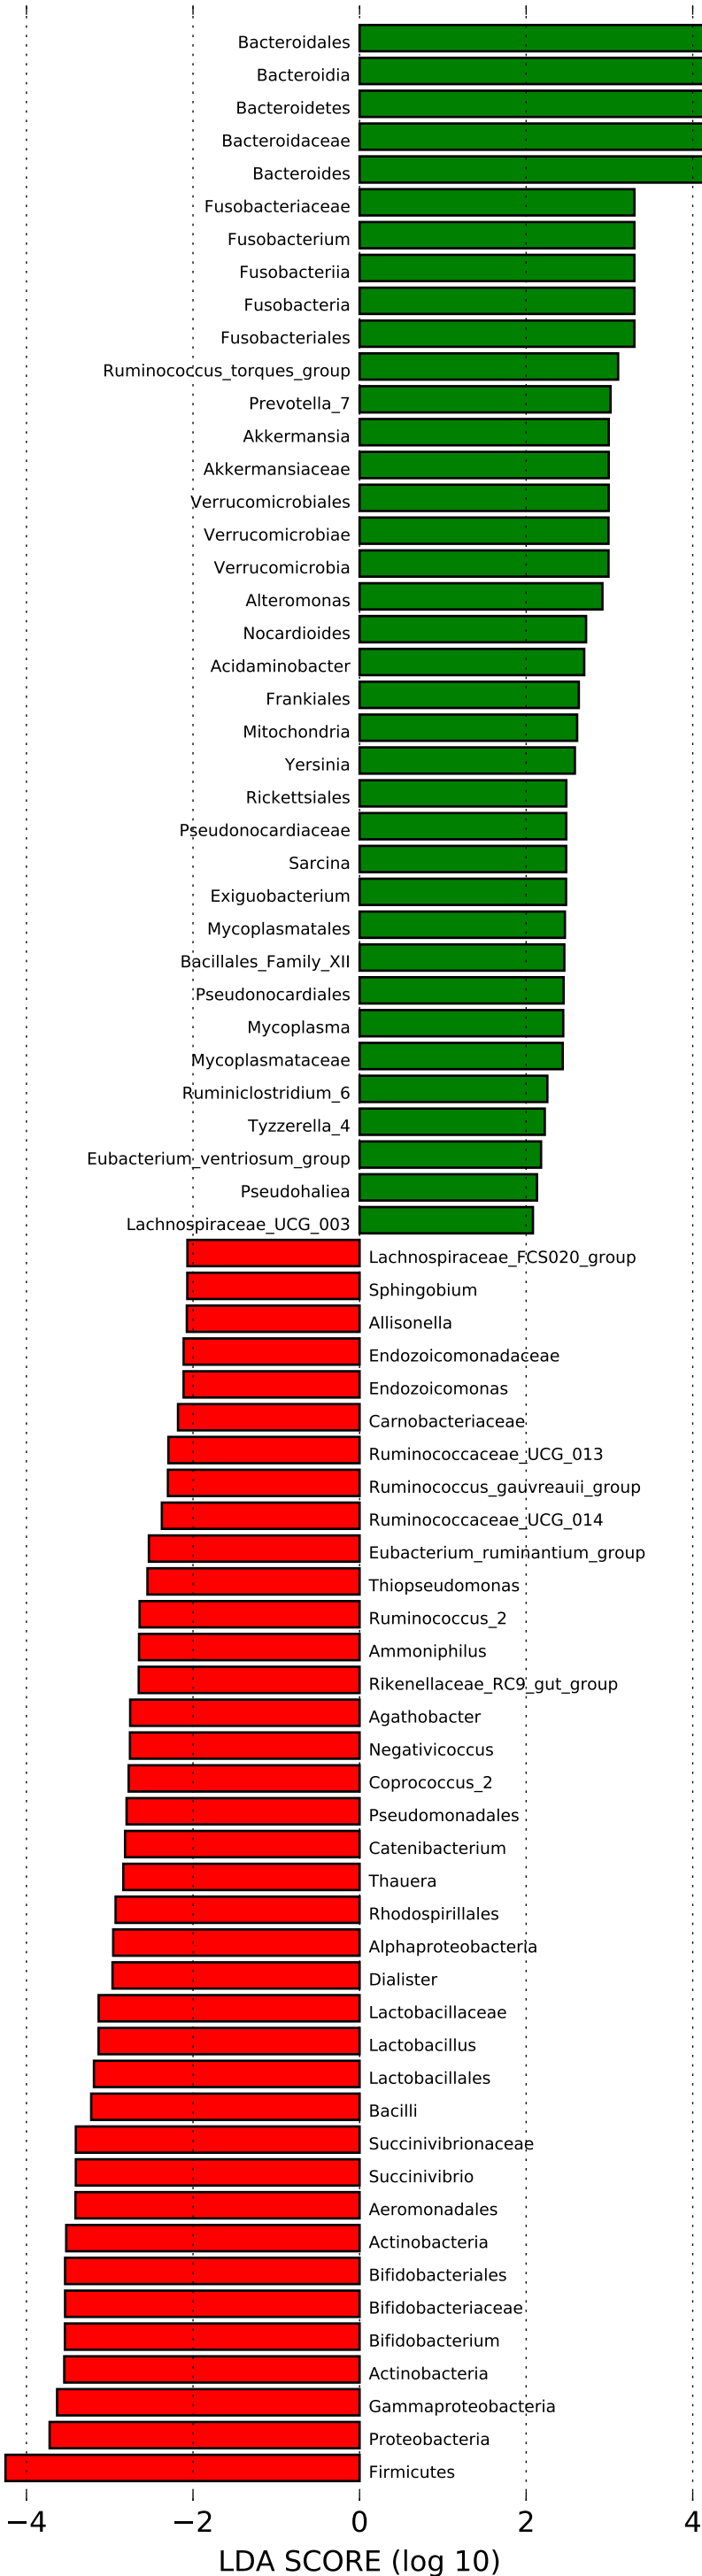

■ Guizhou

■ InnerMongolia

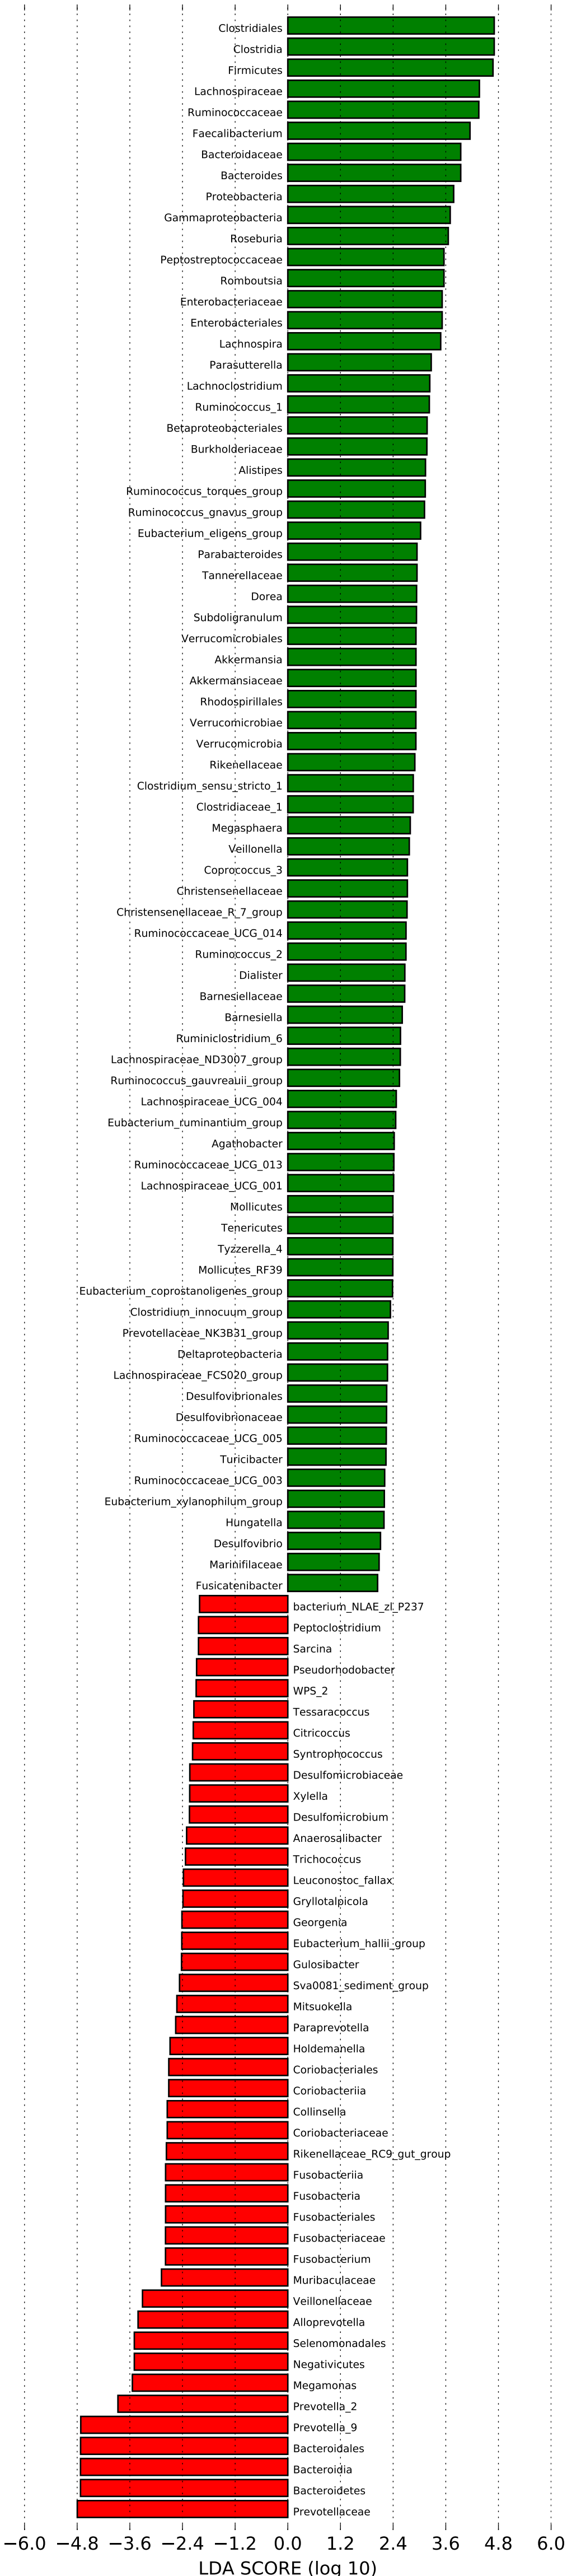

Guizhou Jilin

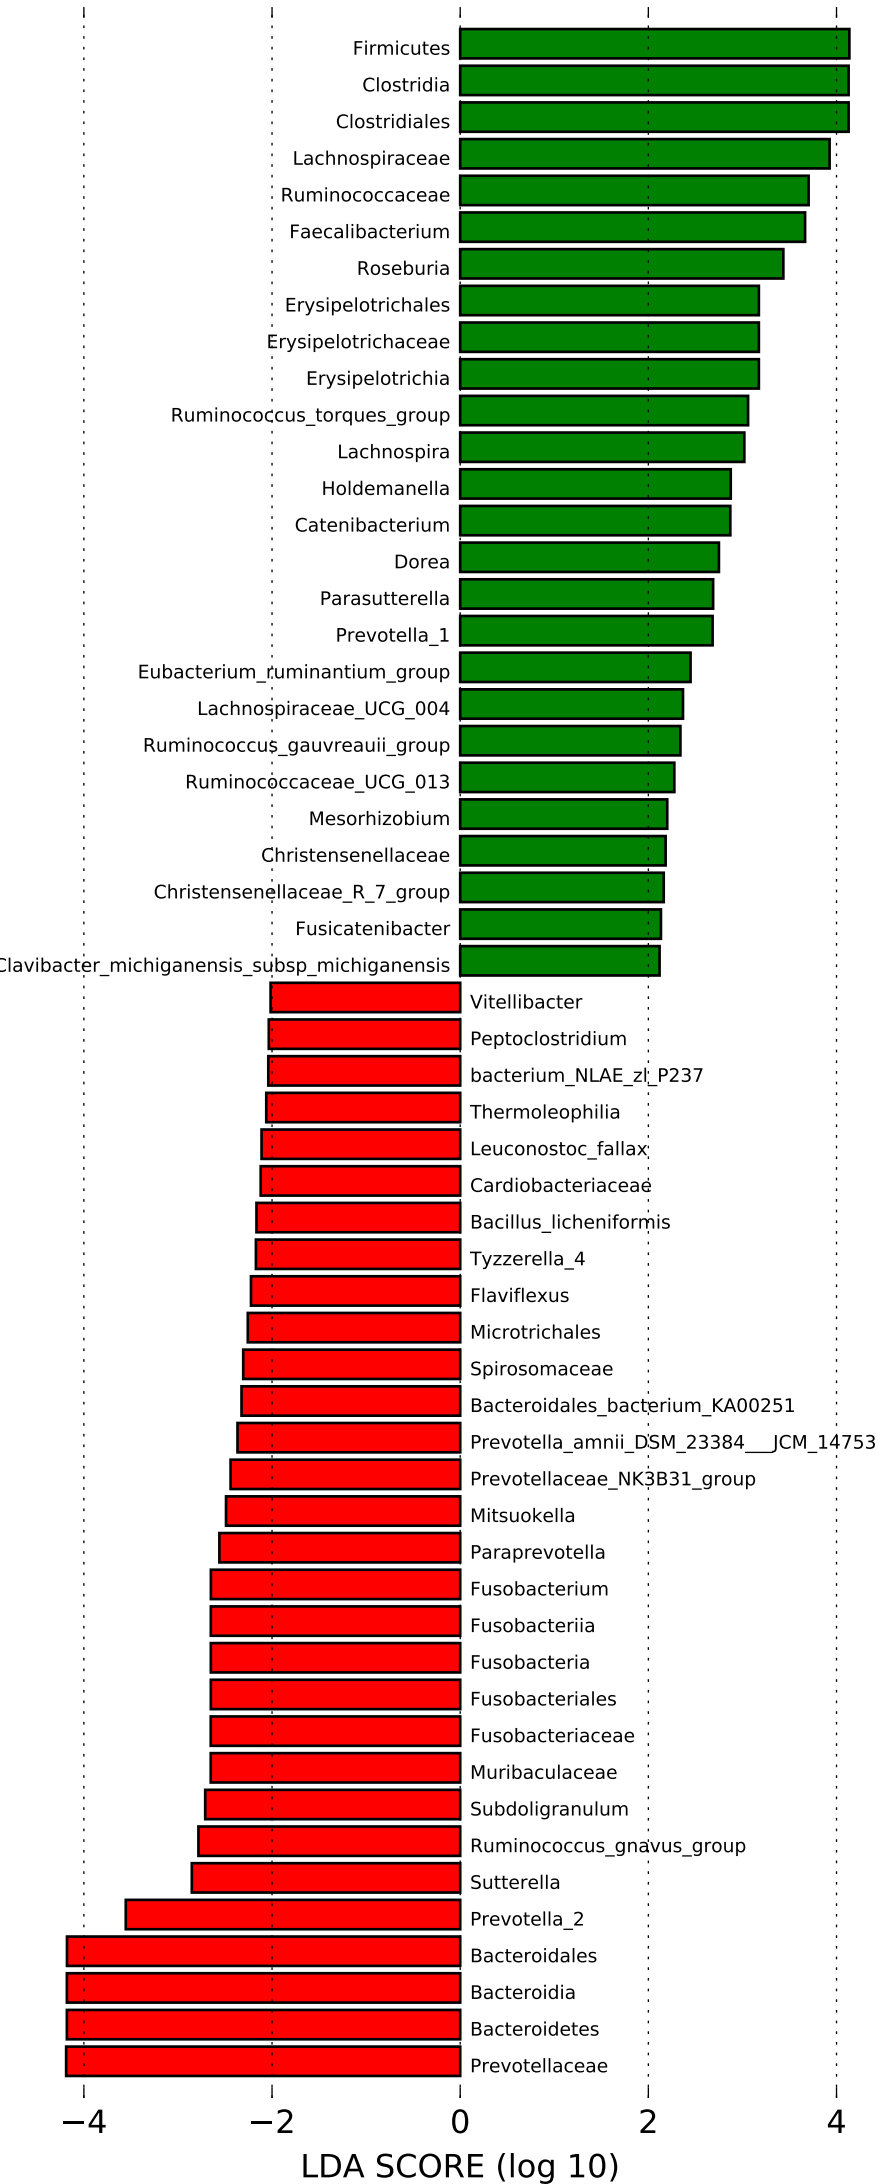

Guizhou Tibet

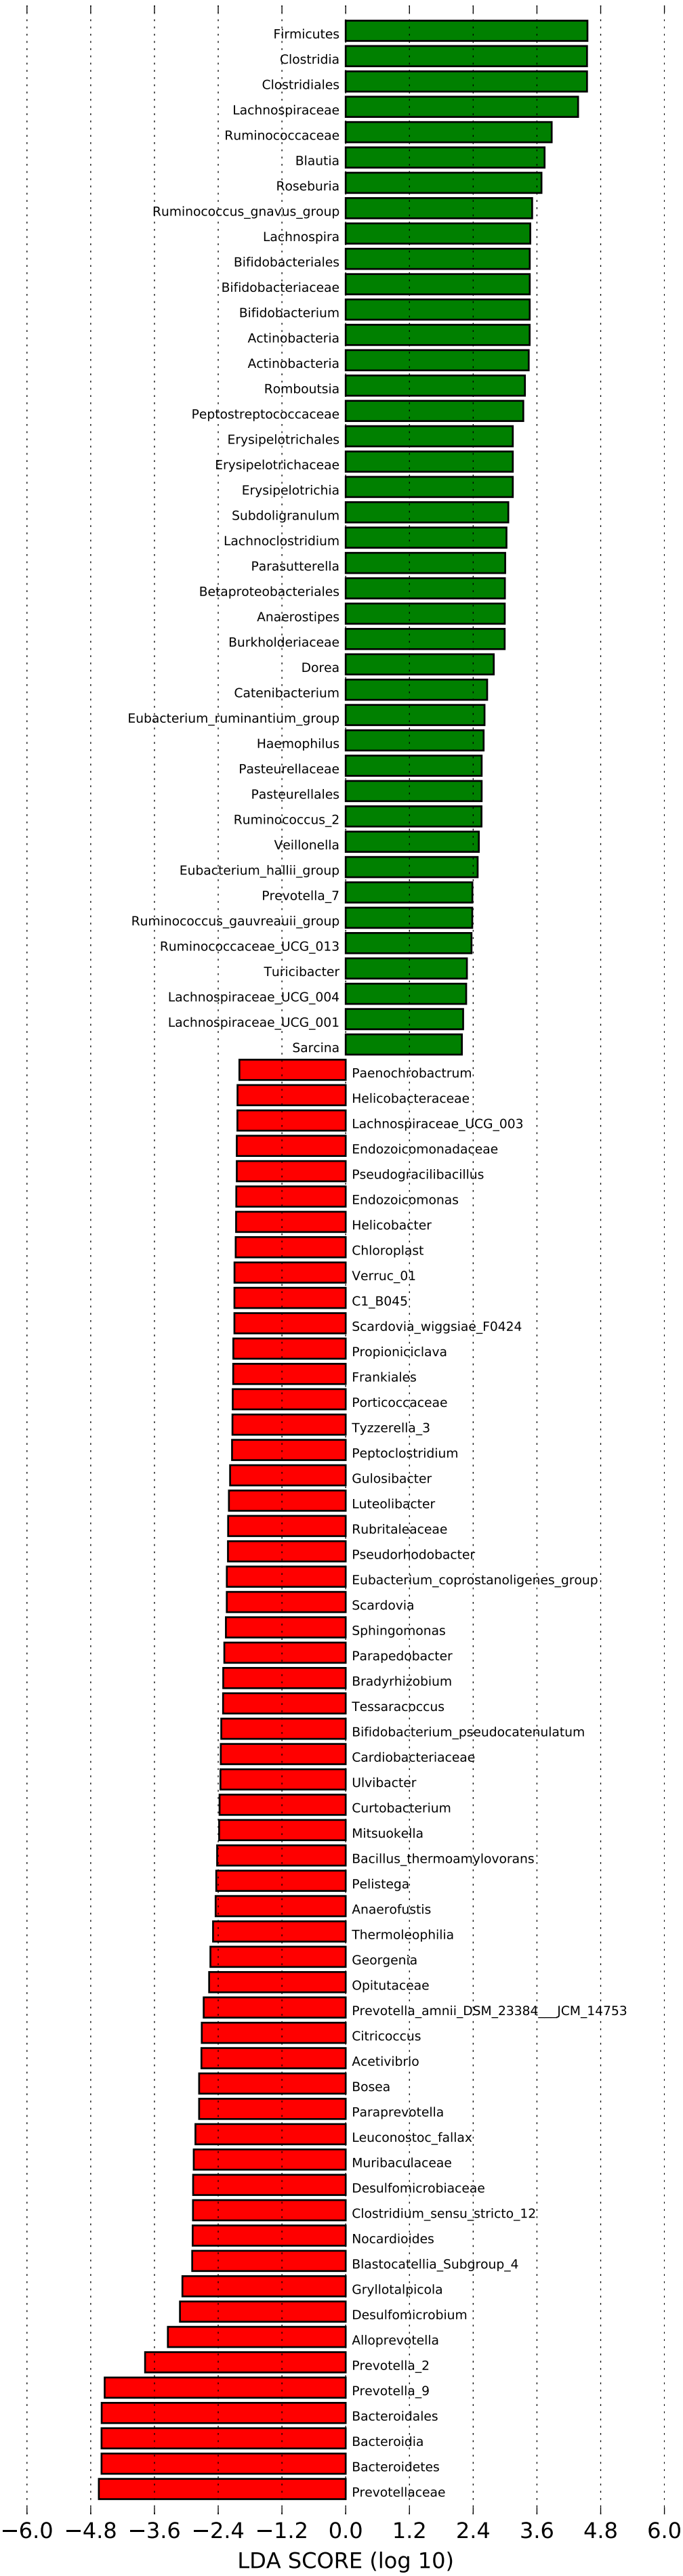

Guizhou

Xinjiang

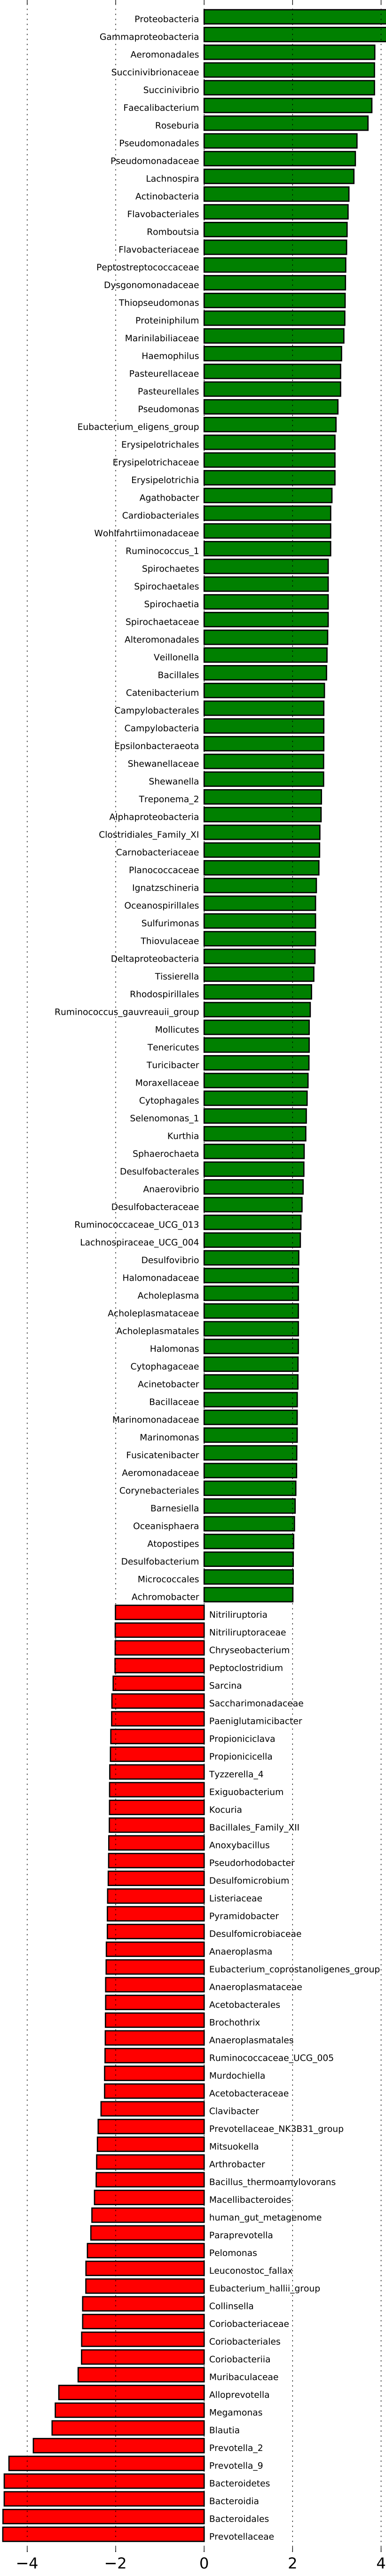

Guizhou Yunnan

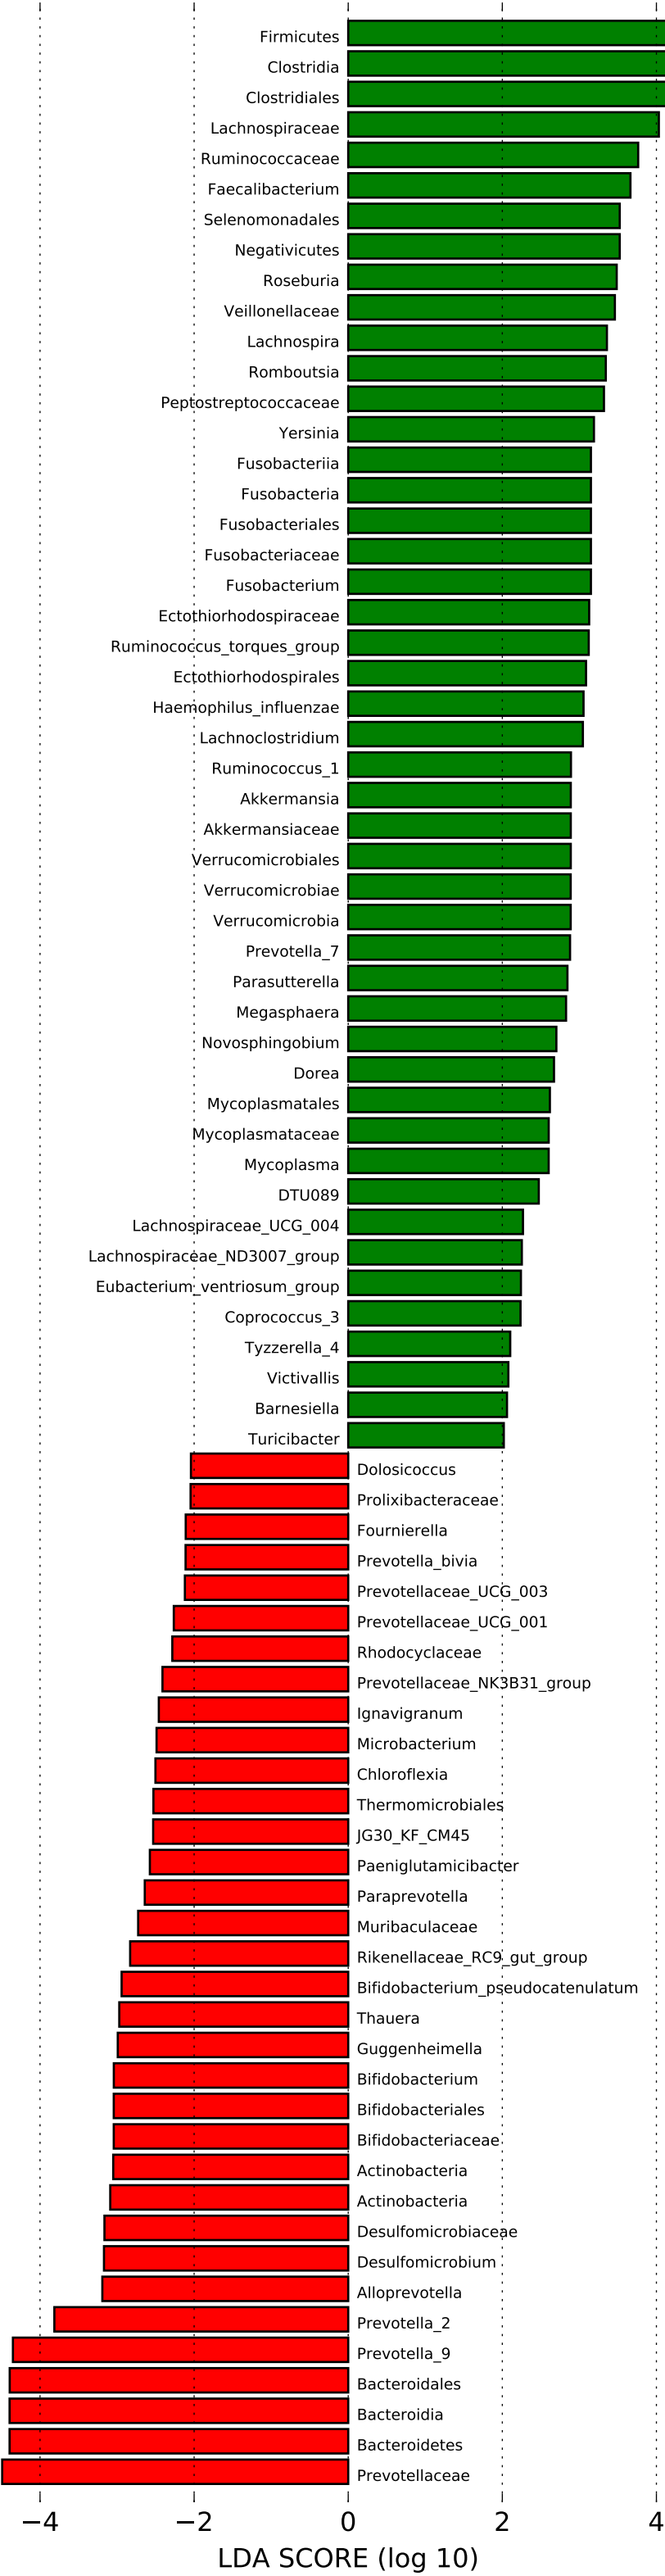



InnerMongolia

Jilin

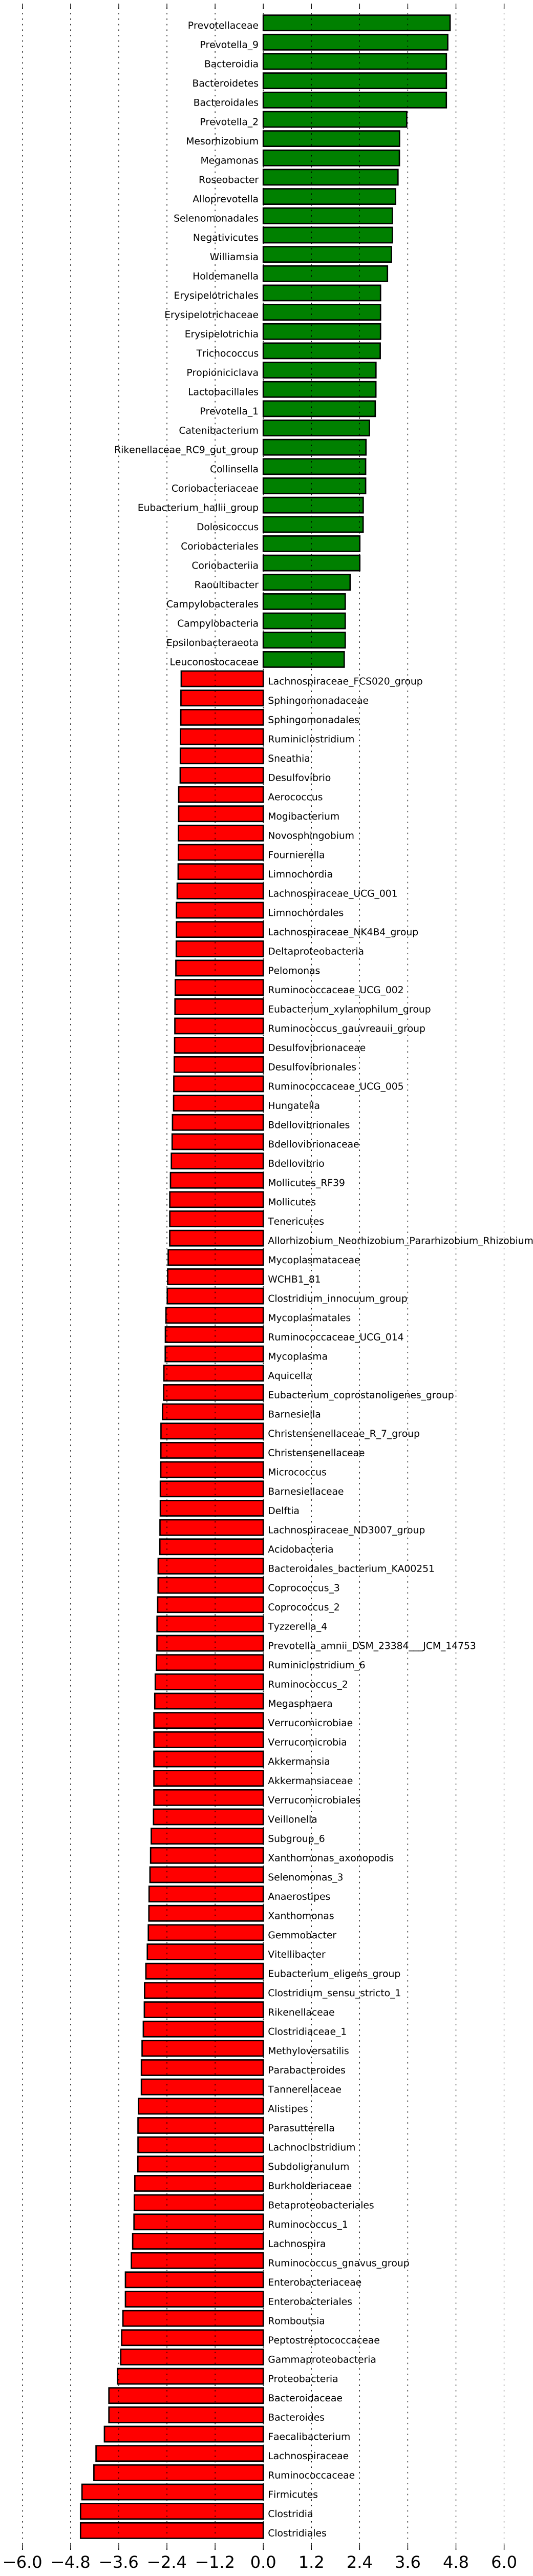

InnerMongolia Tibet

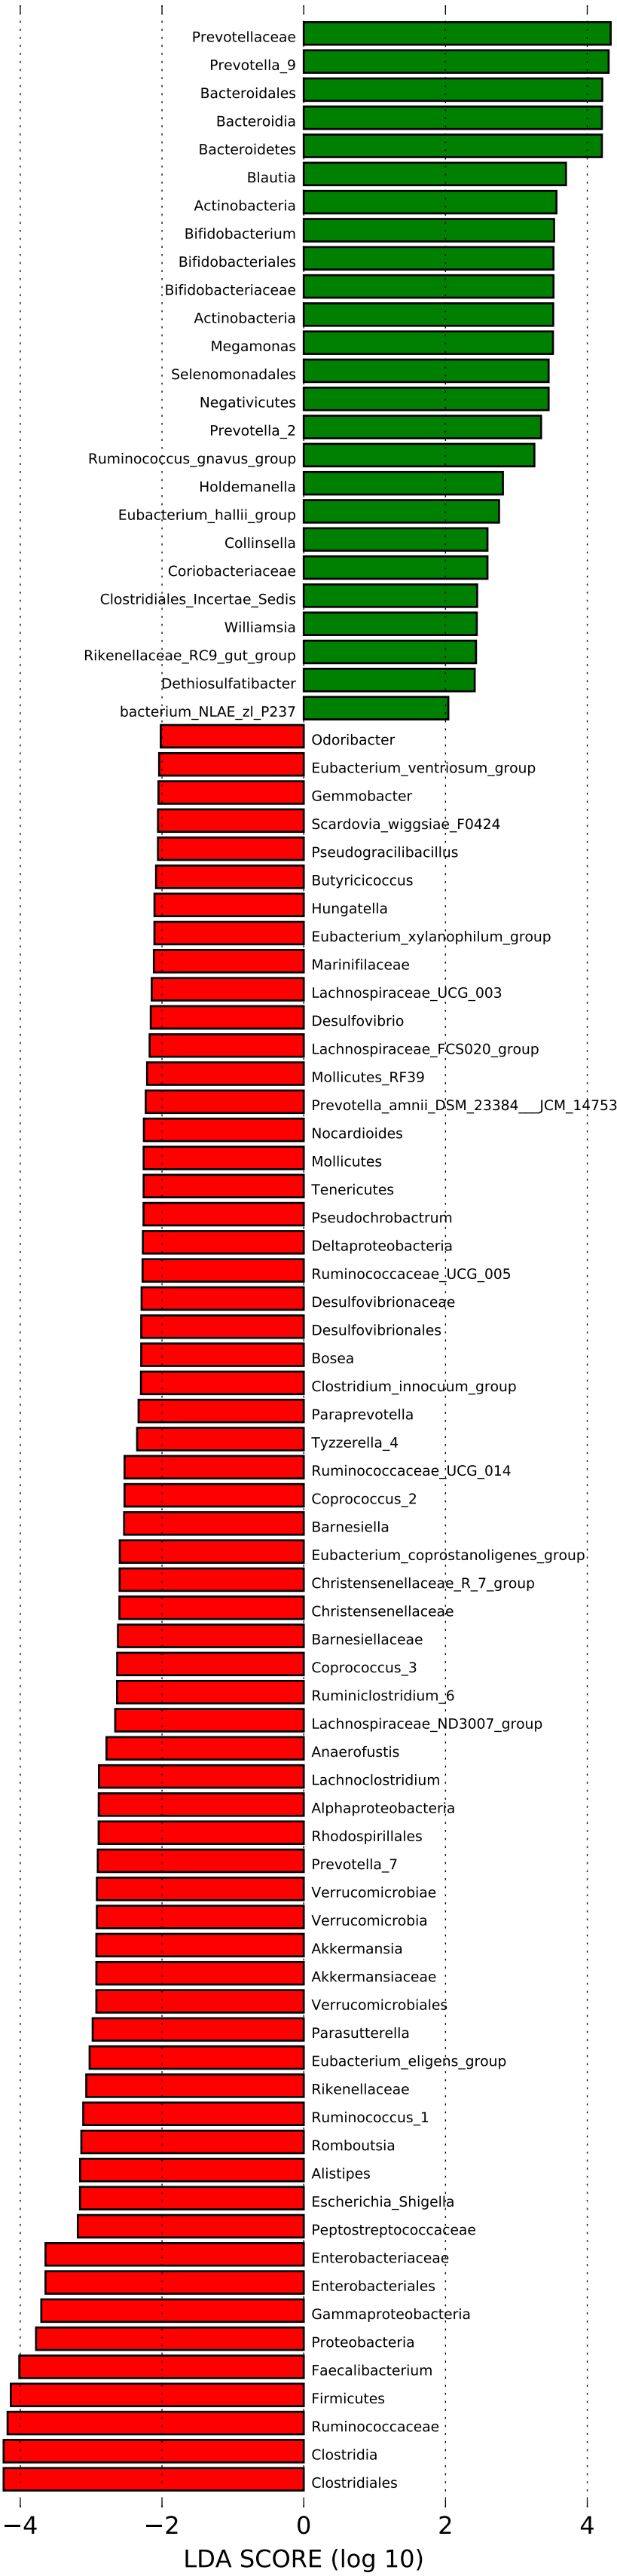

LDA SCORE (log 10)

InnerMongolia Xinjiang

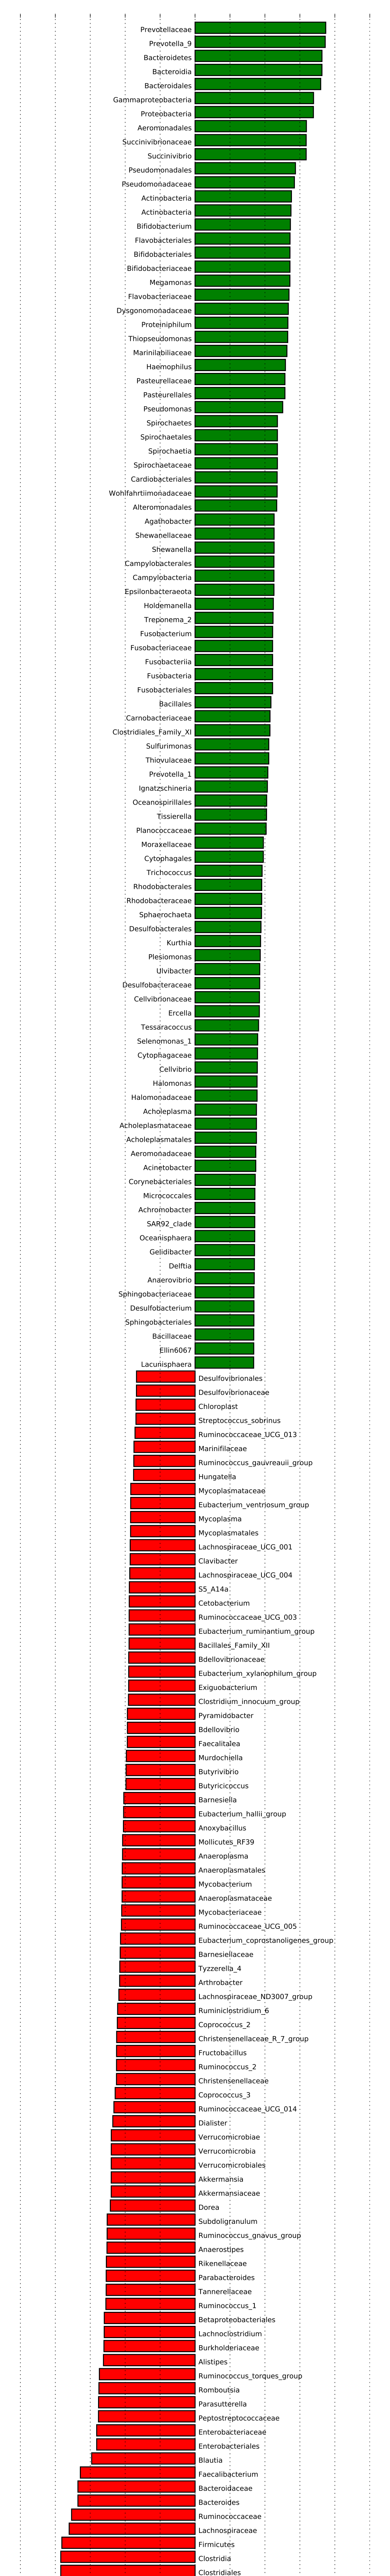

InnerMongolia      Yunnan

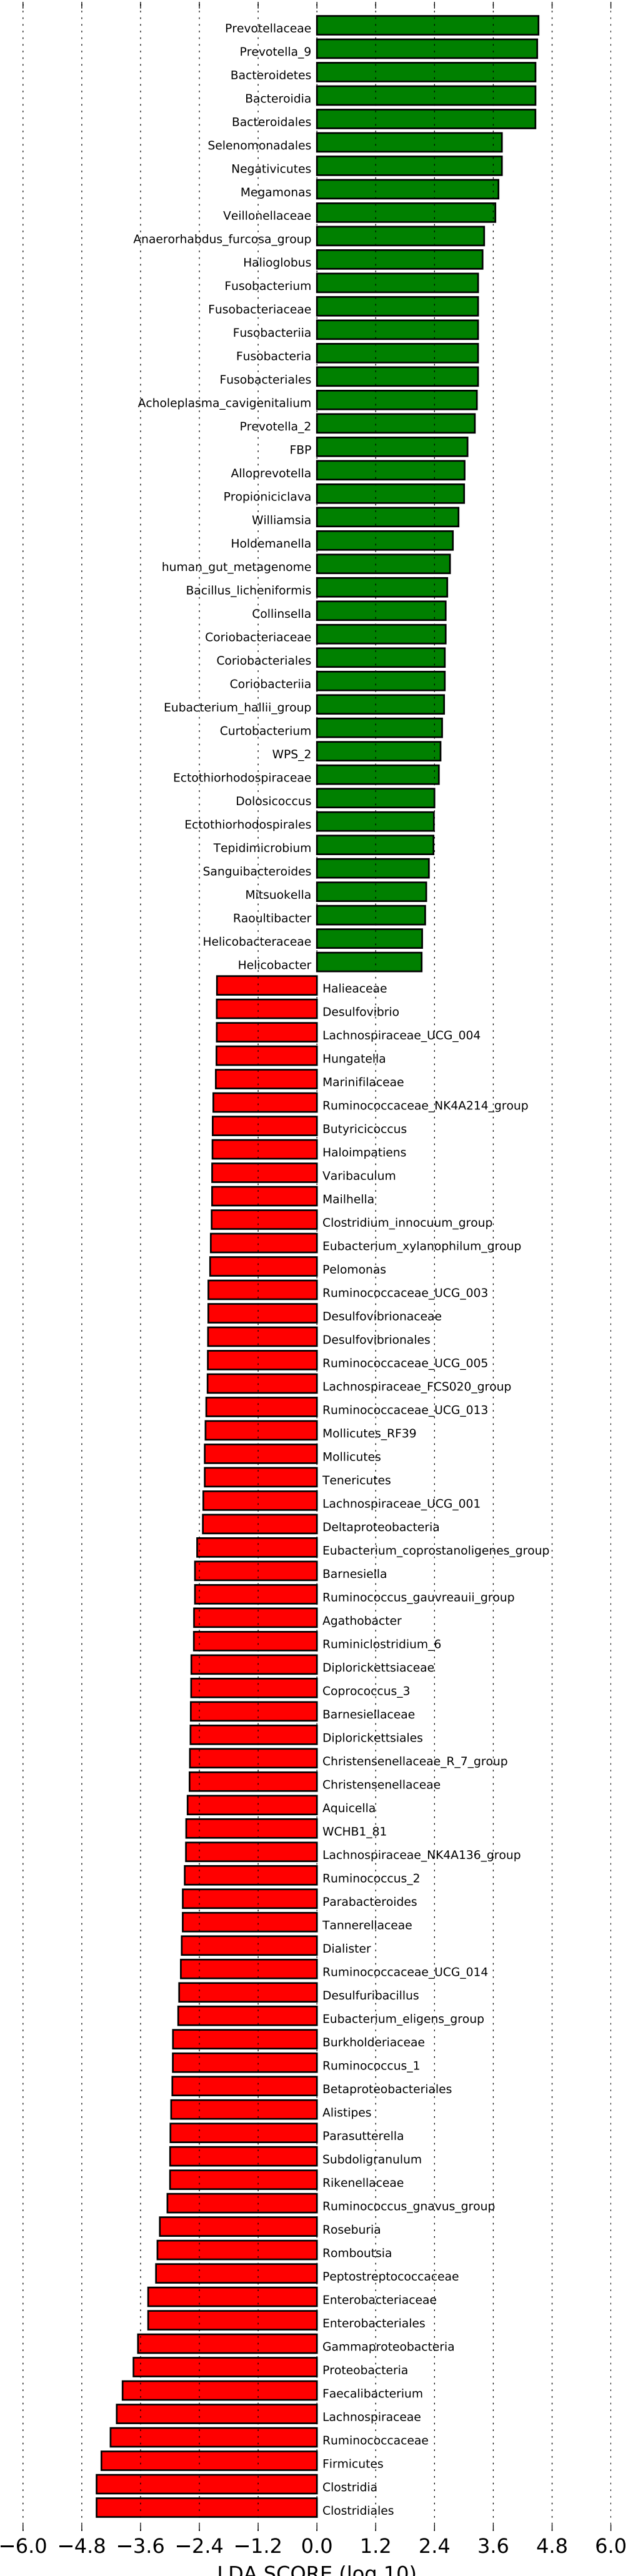

Jilin Tibet

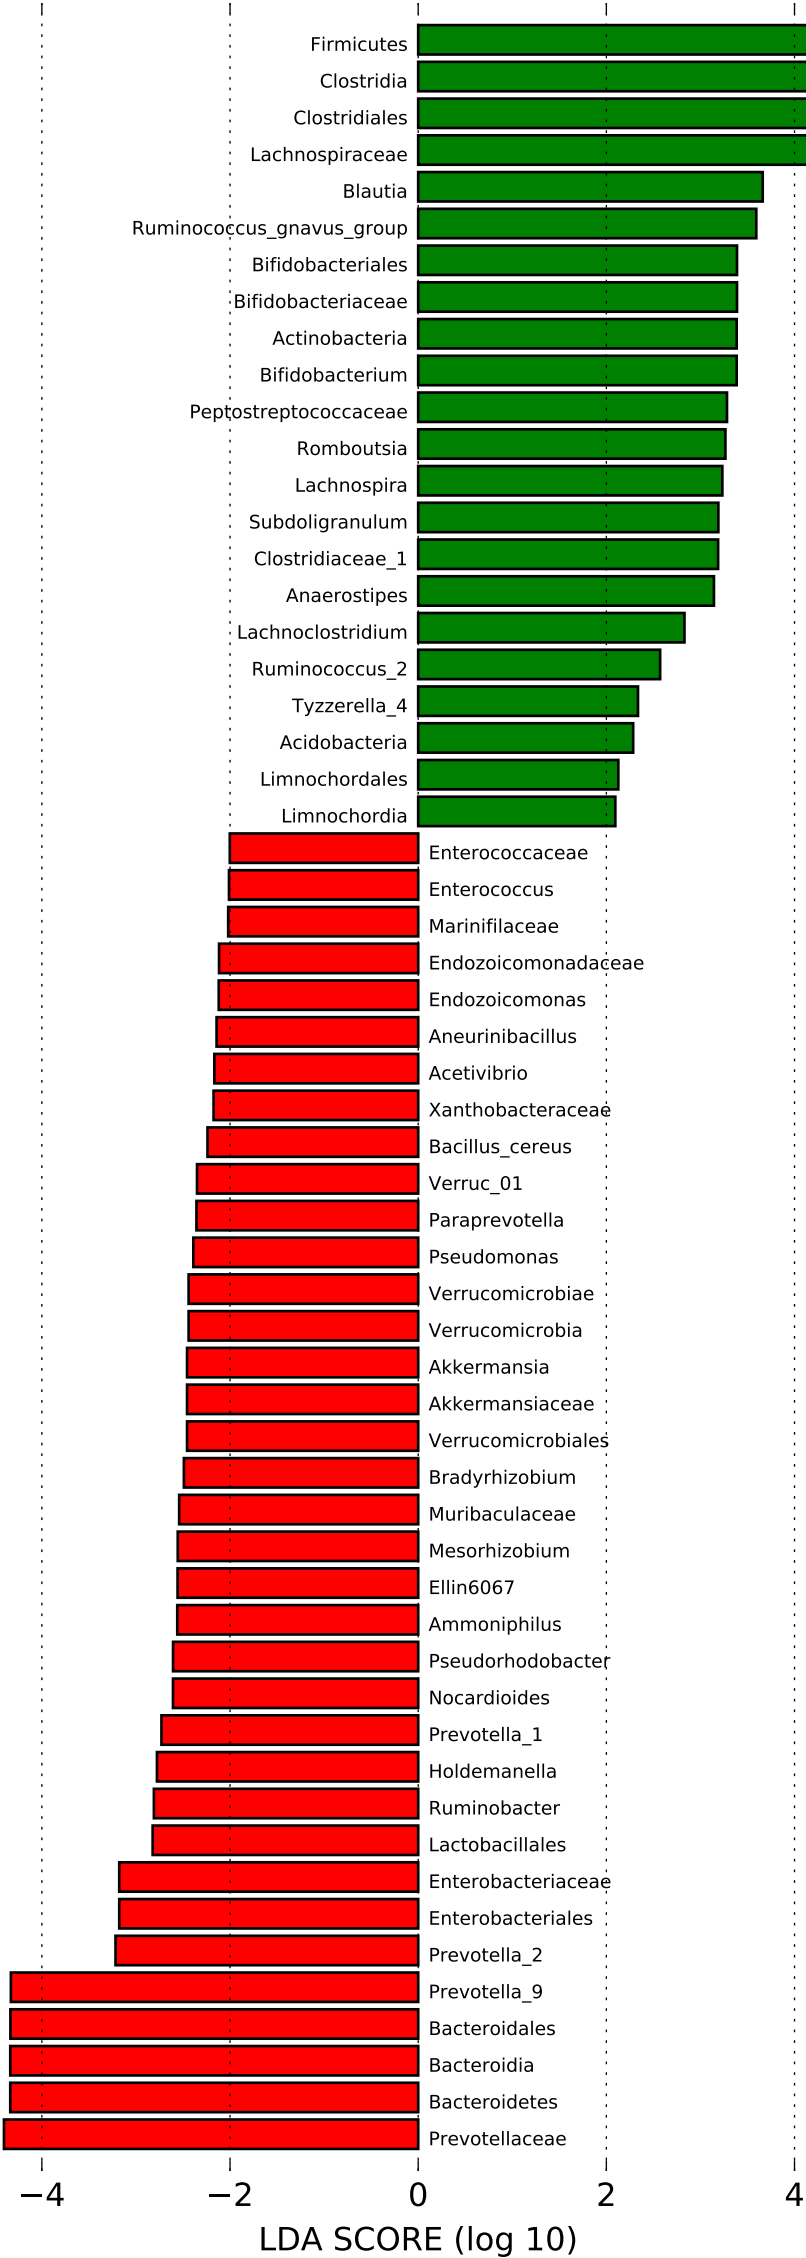

■ Jilin    ■ Xinjiang

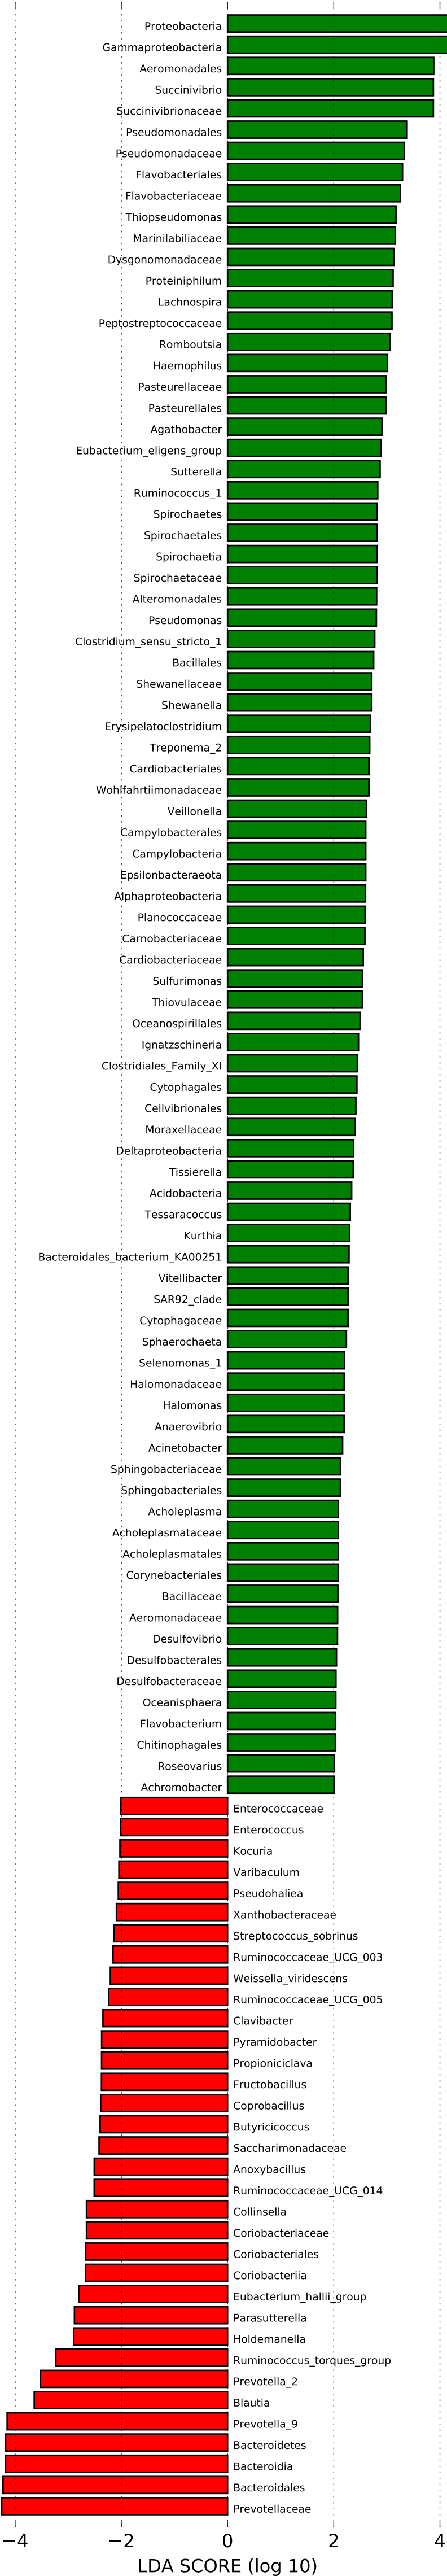

LDA SCORE (log 10)

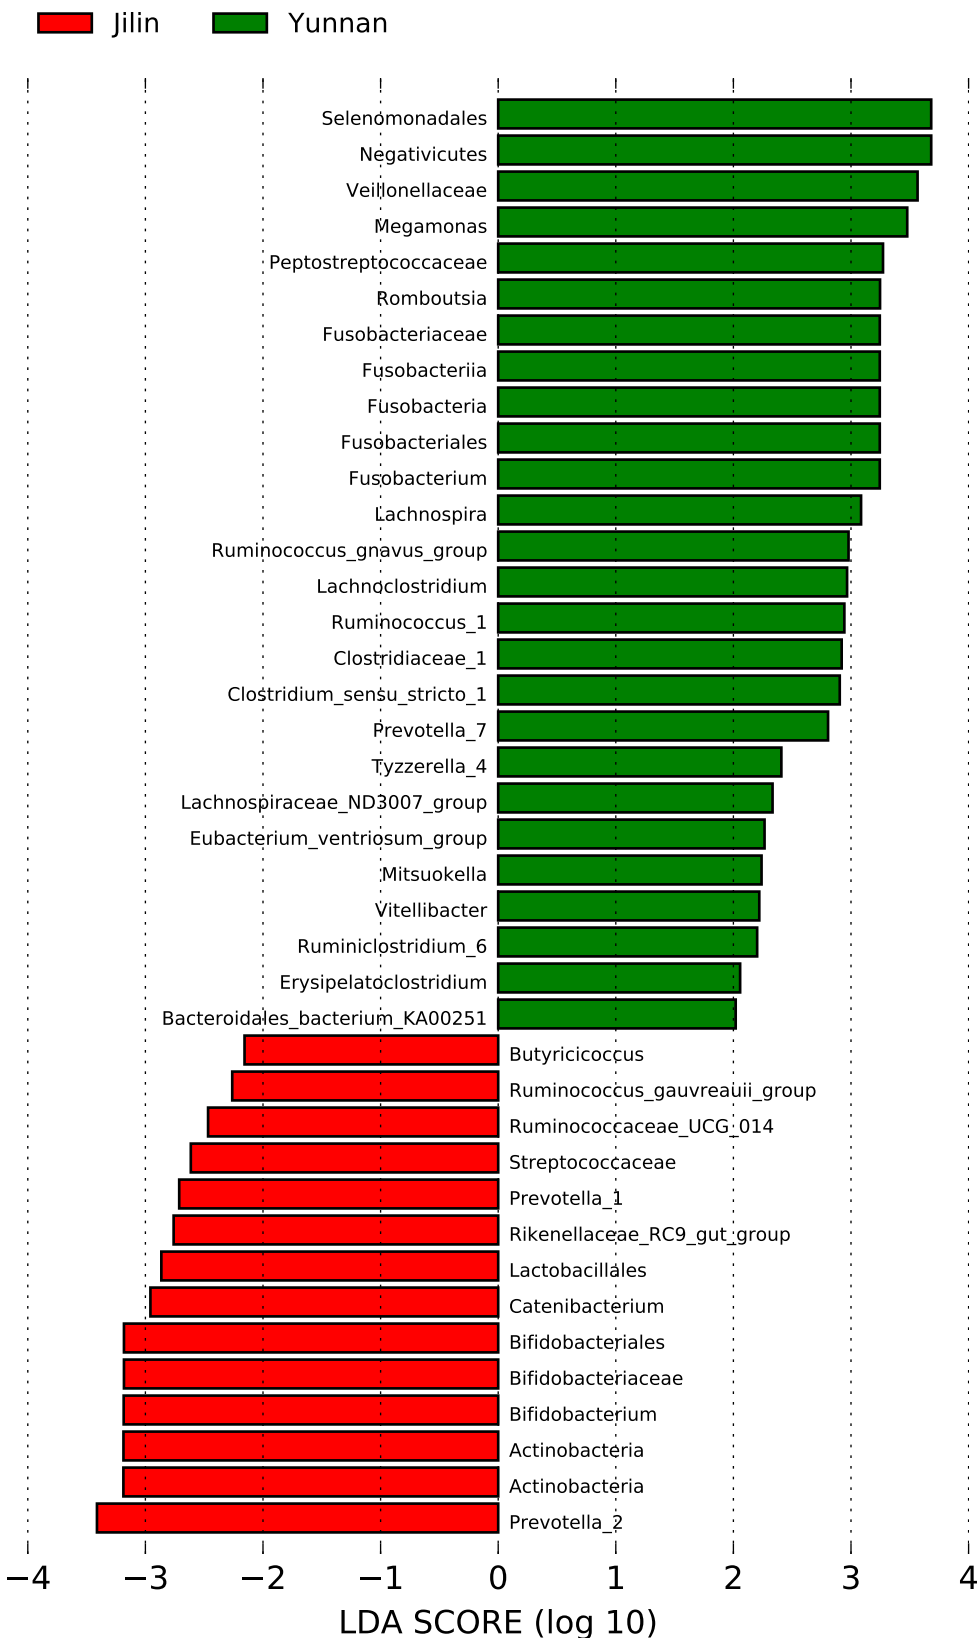

Tibet Xinjiang

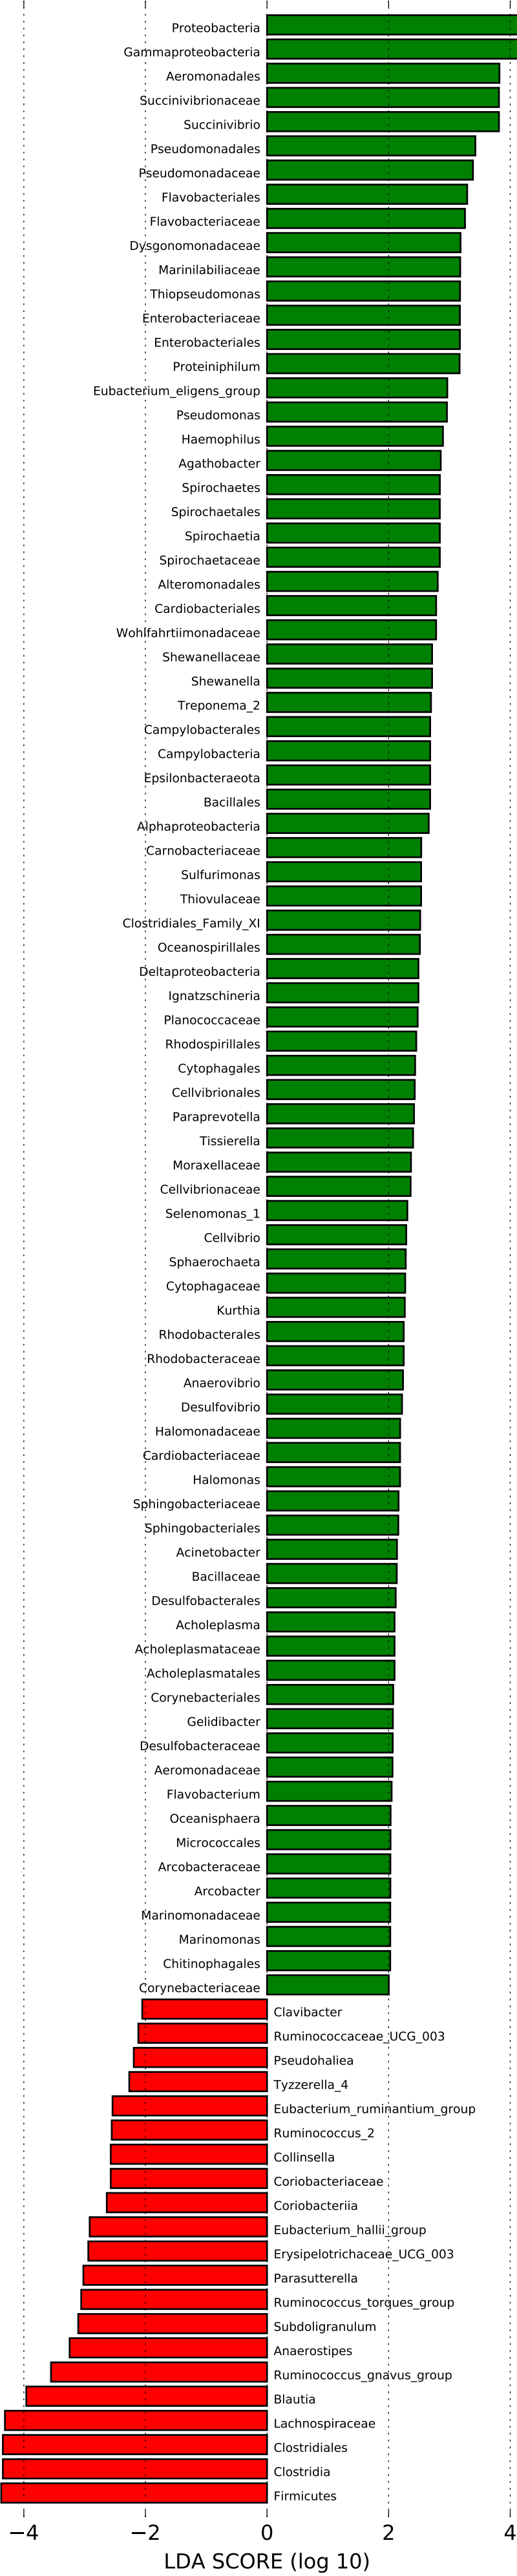



Tibet Yunnan

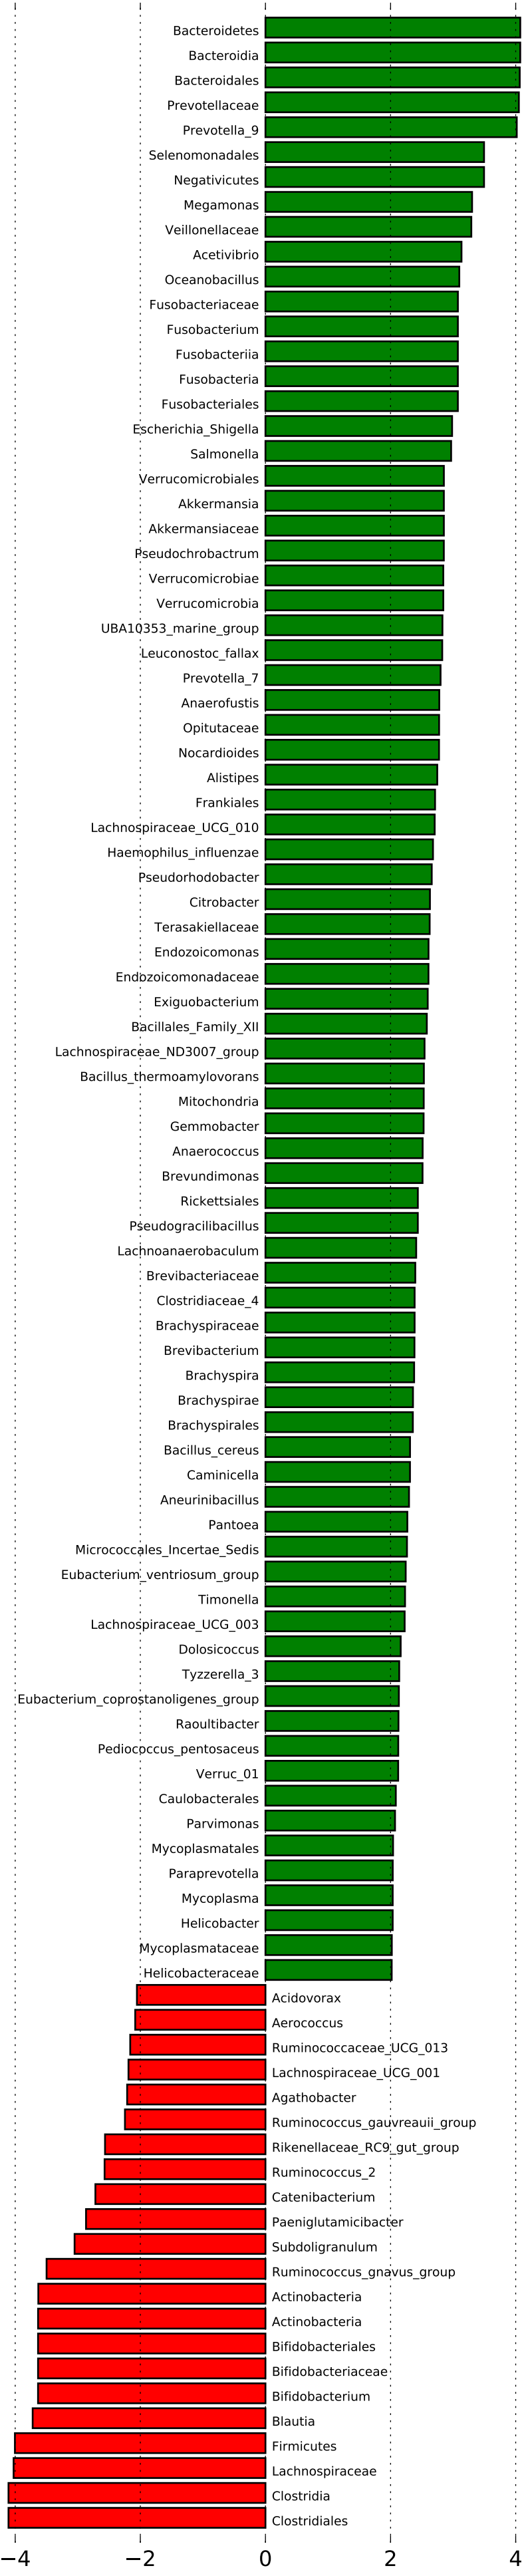

Xinjiang

Yunnan

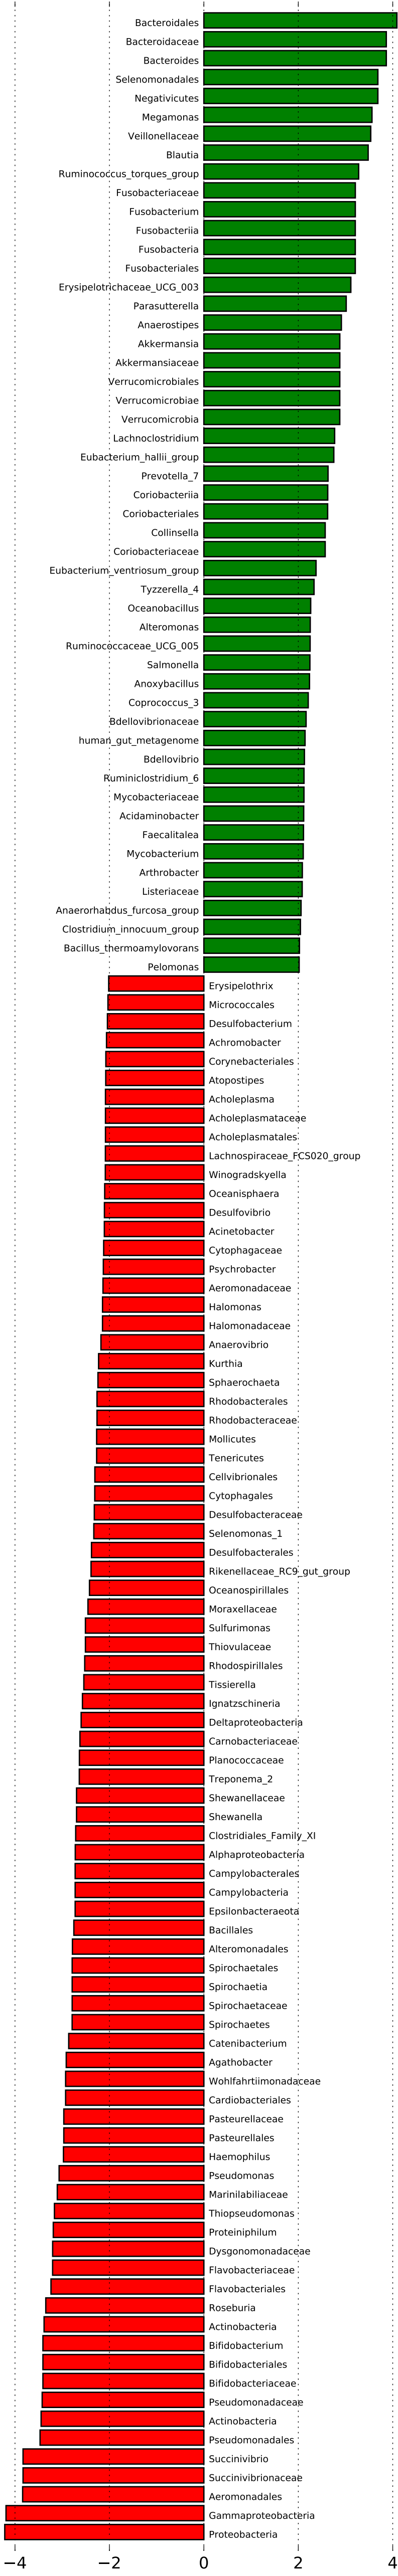

Gansu      Guizhou

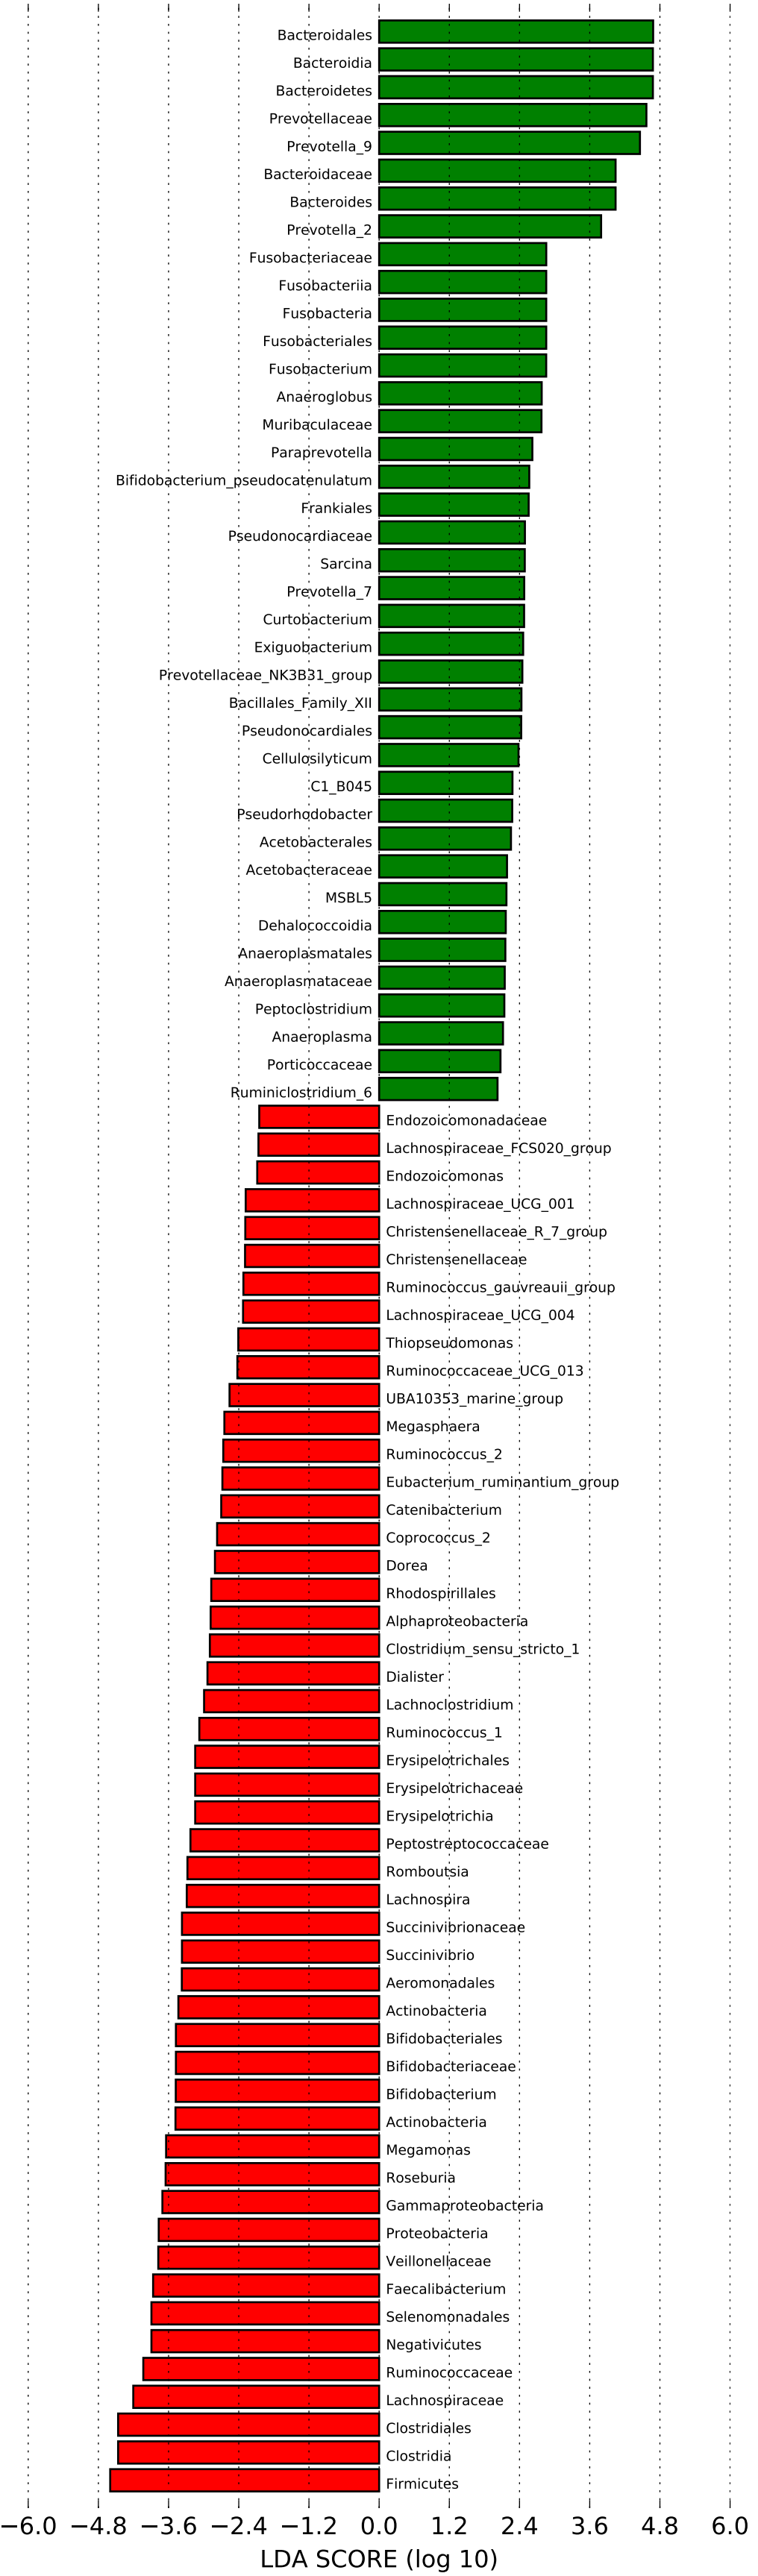

Gansu InnerMongolia

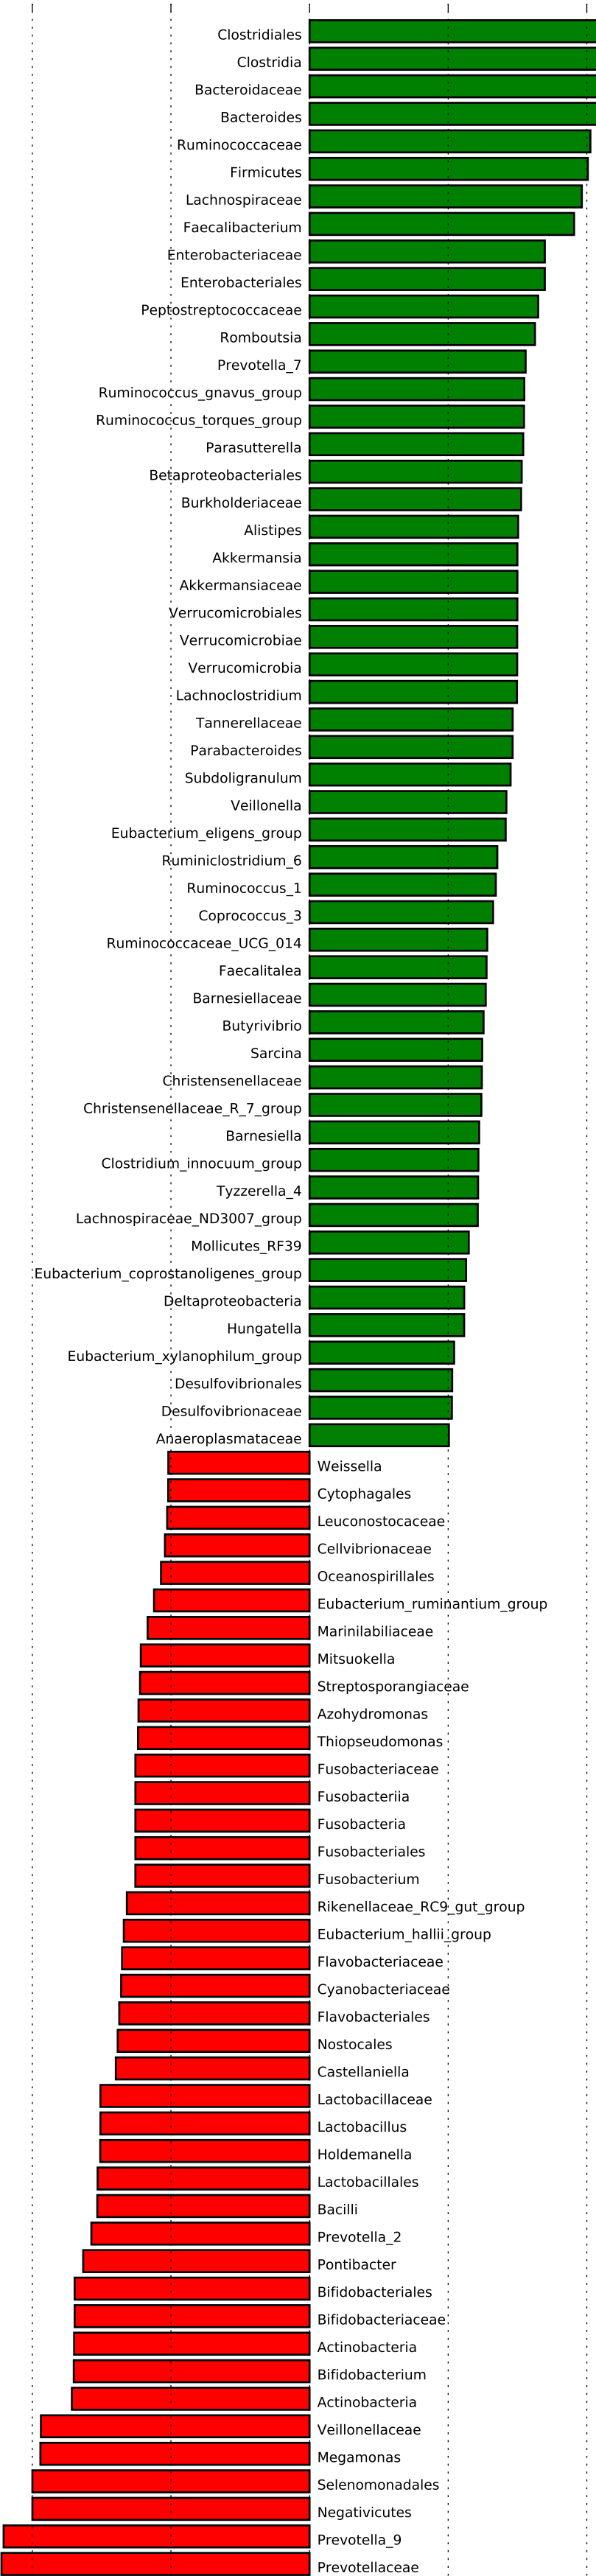

LDA SCORE (log 10)

Gansu Jilin

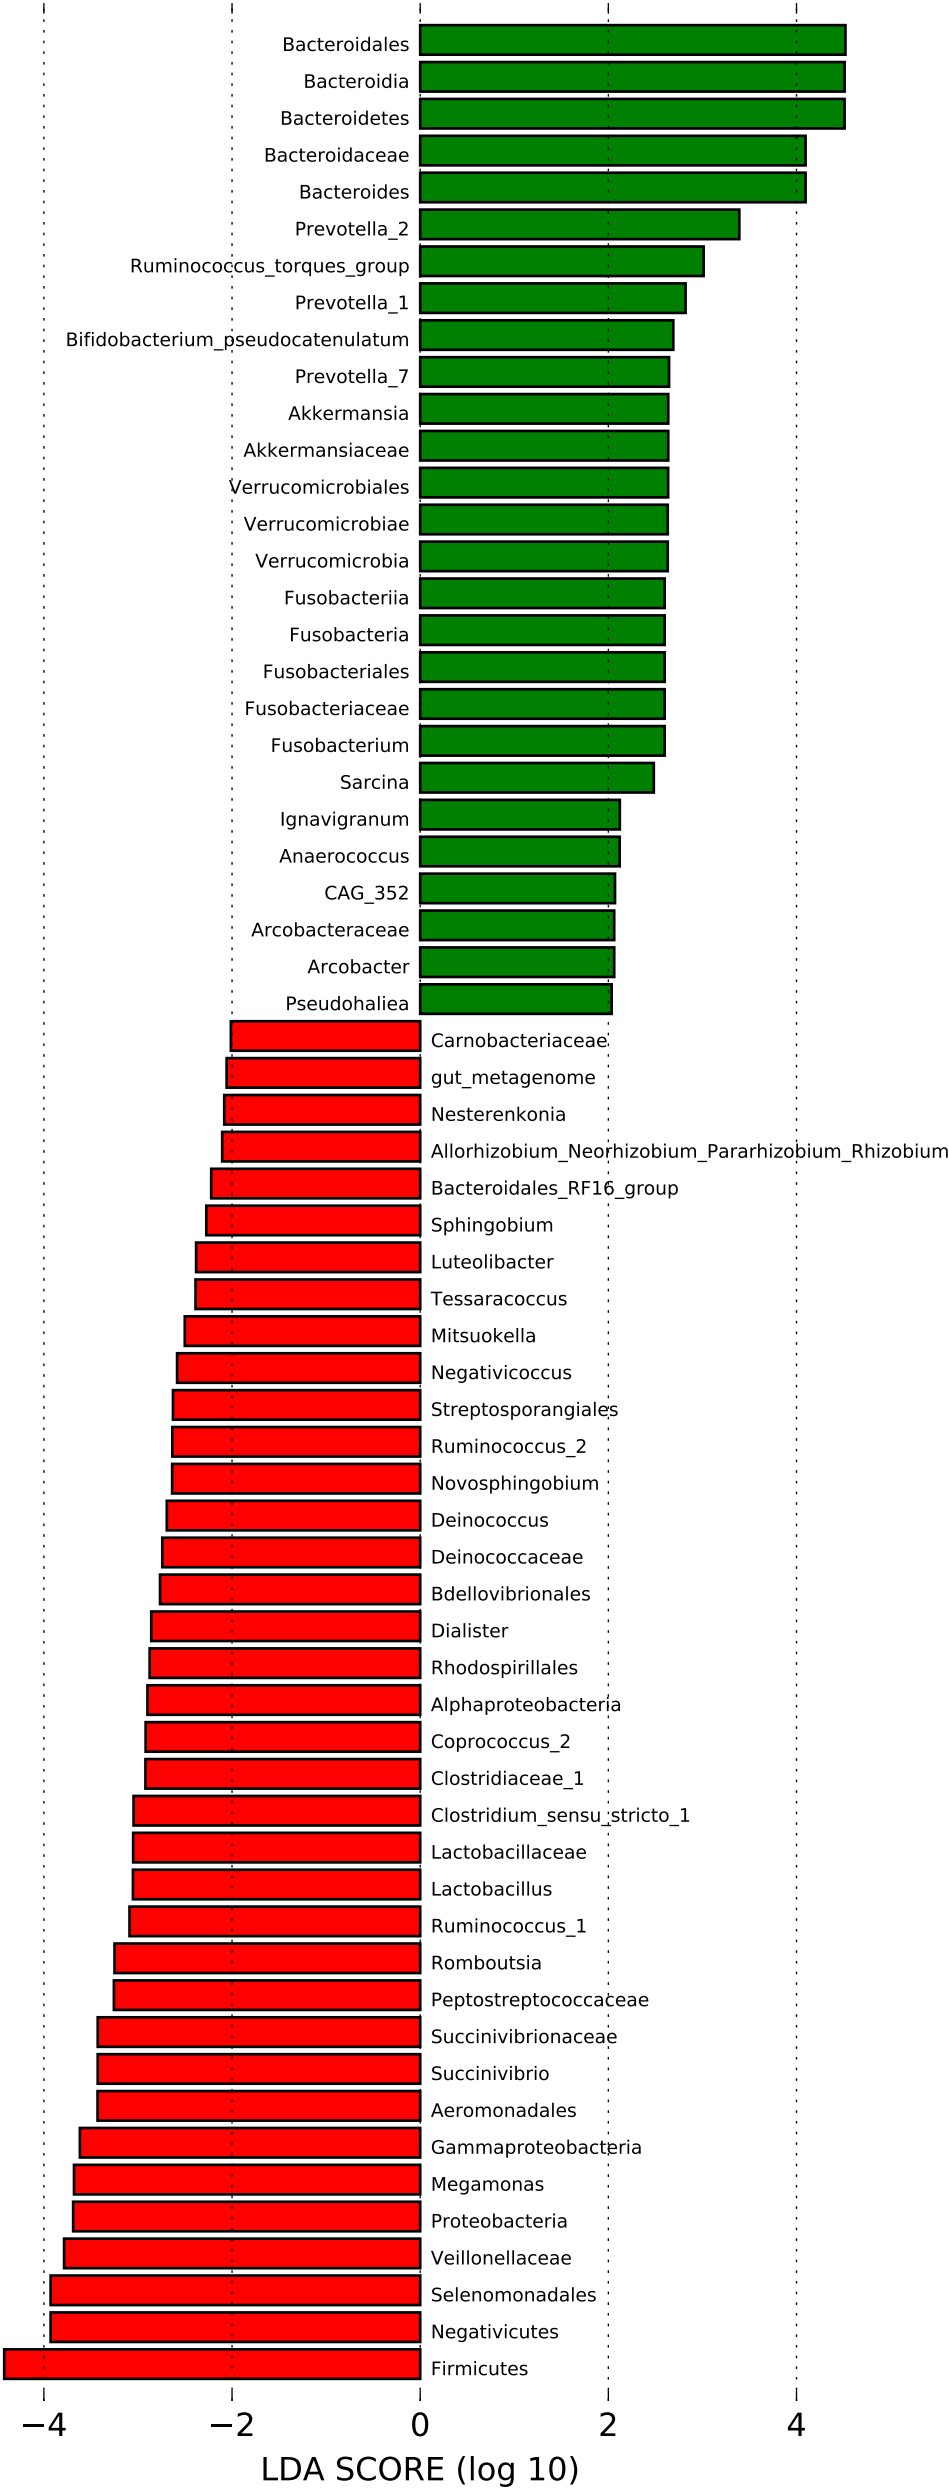

■ Gansu      ■ Tibet

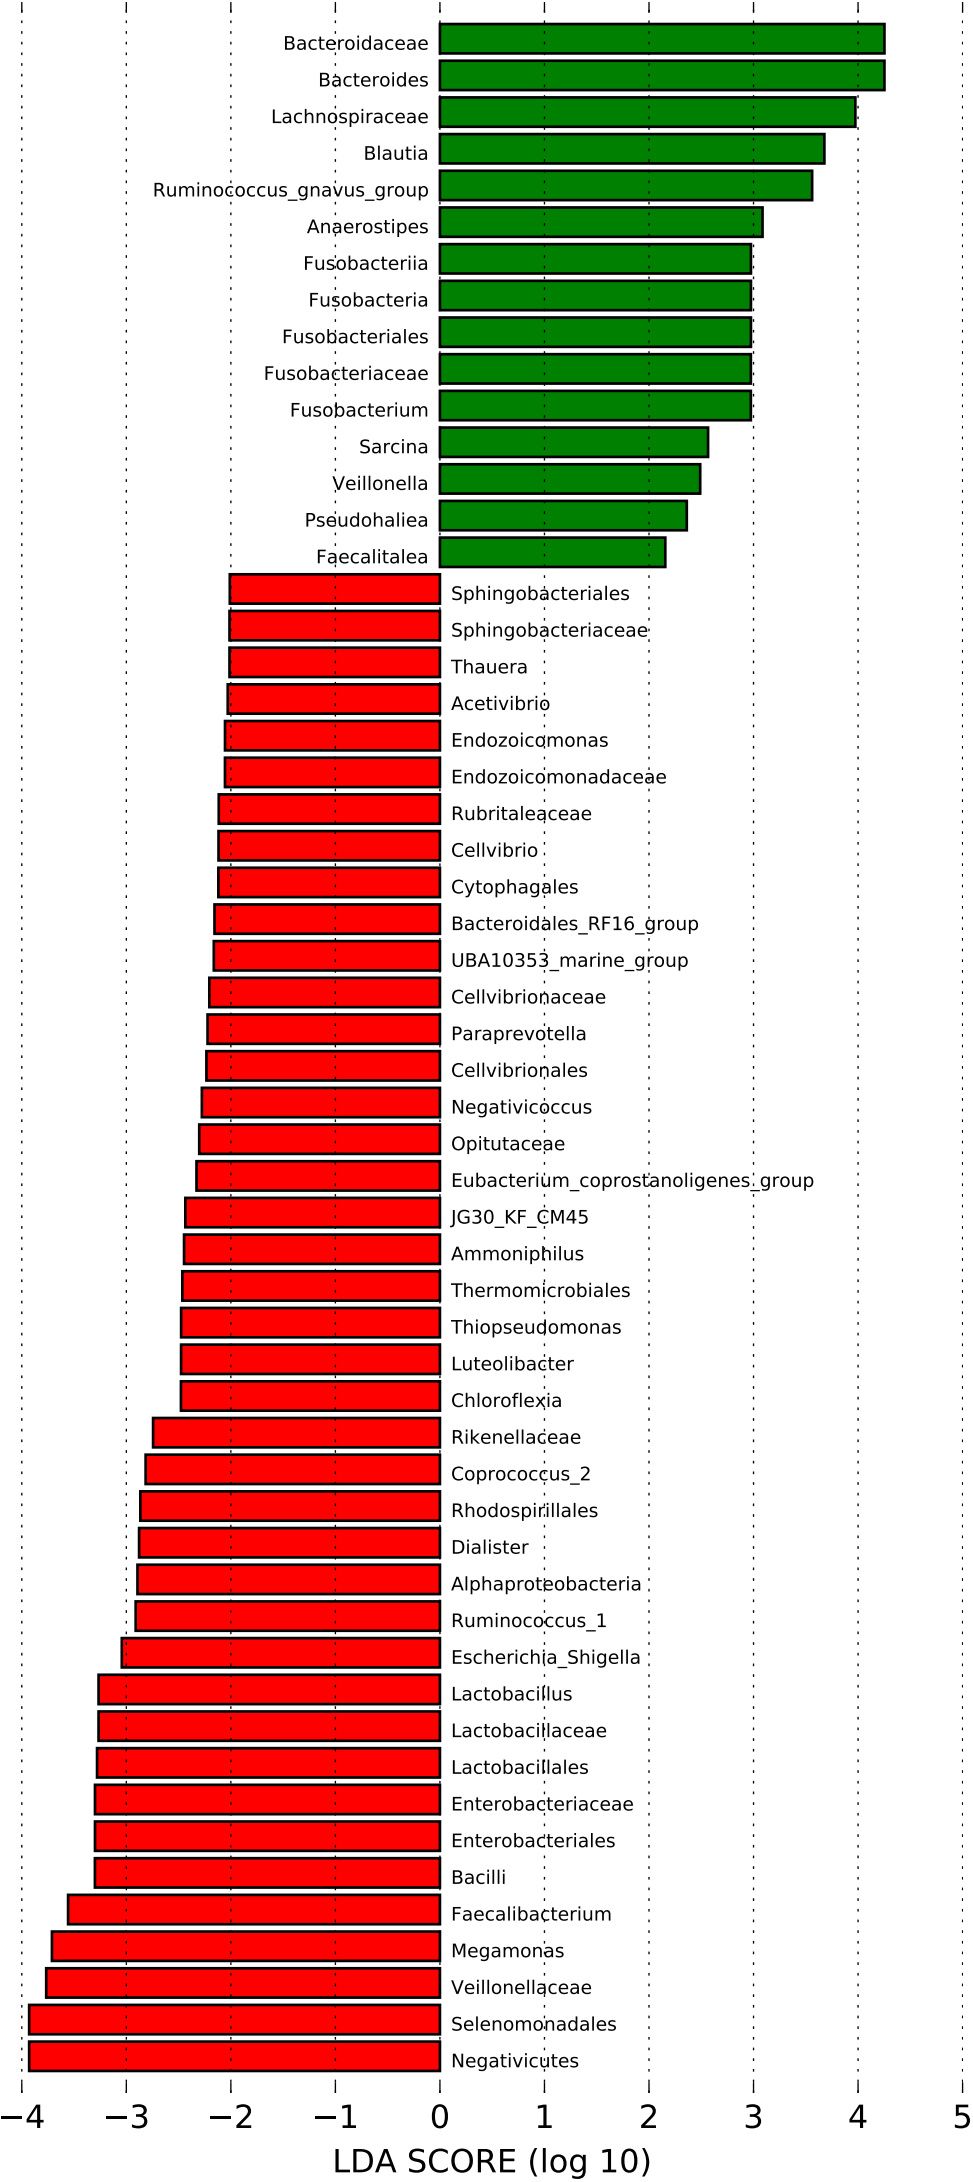

■ Korean      ■ Miao

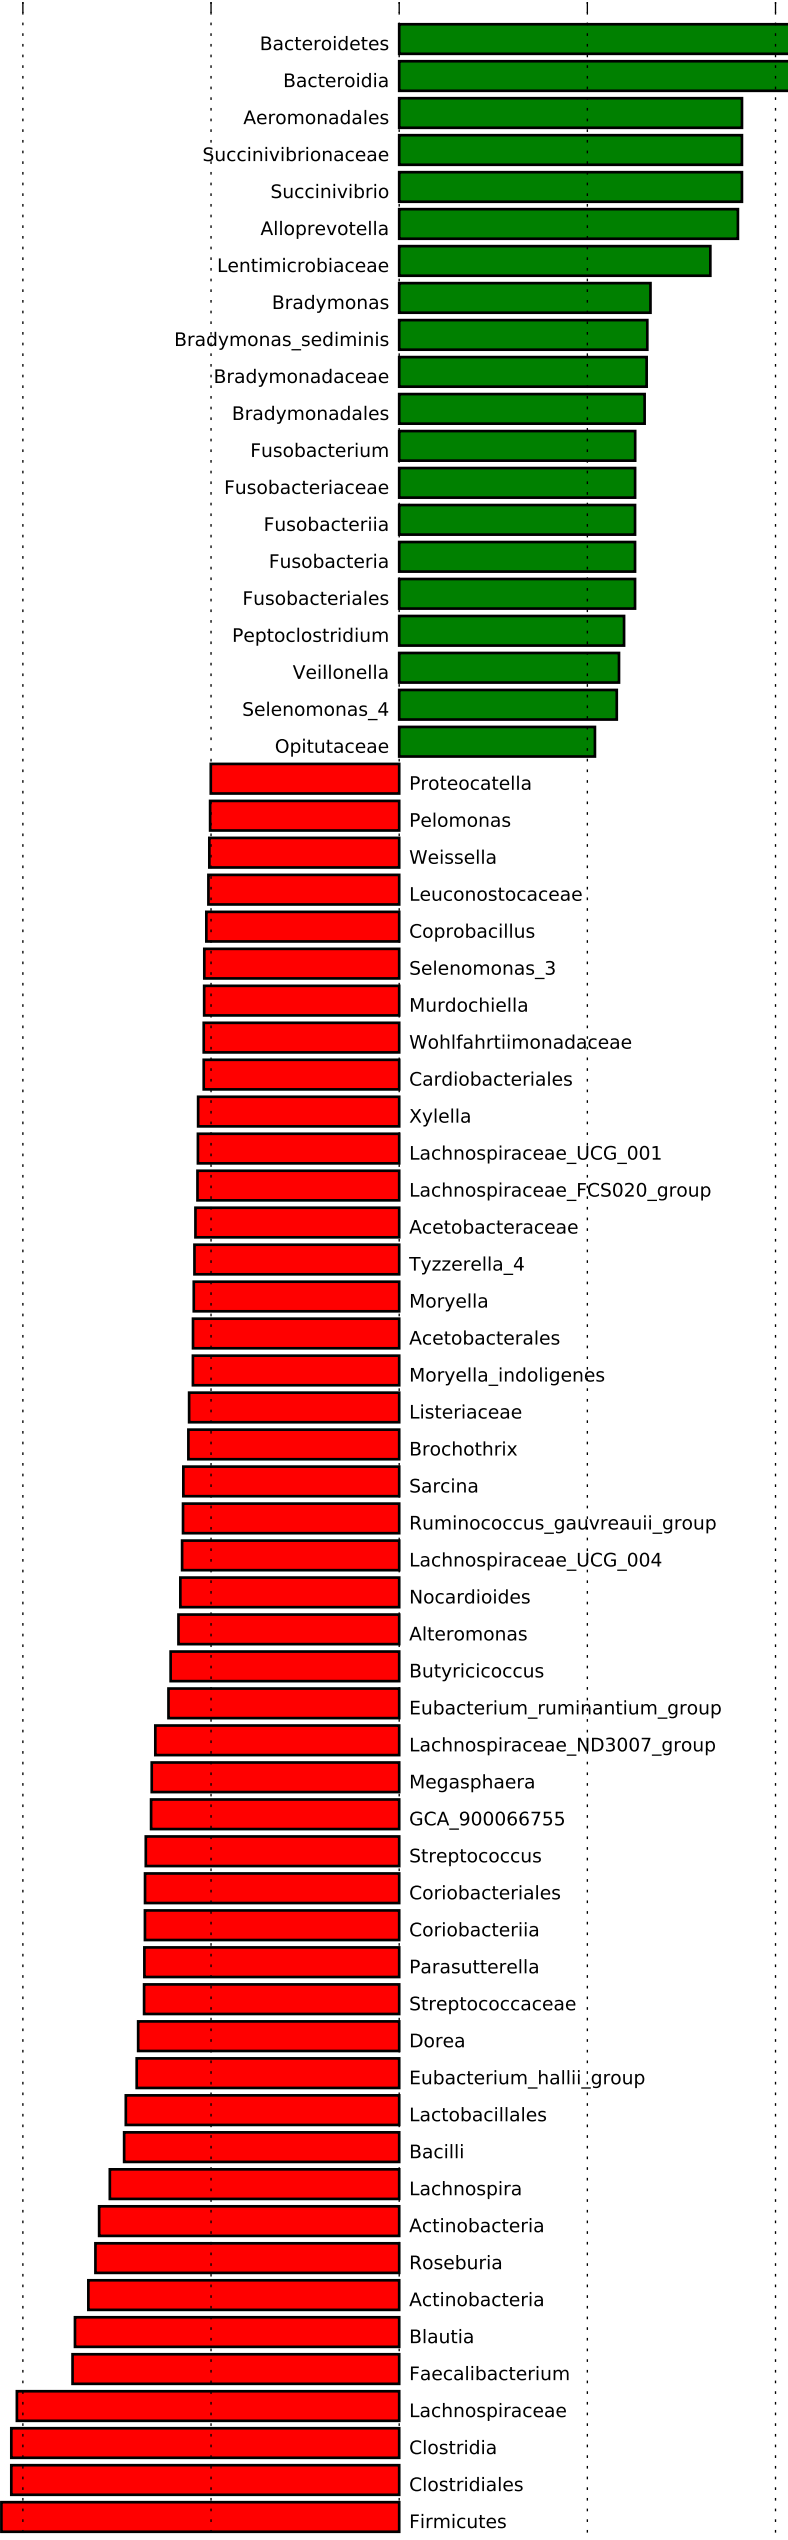

LDA SCORE (log 10)

Miao Tibetan

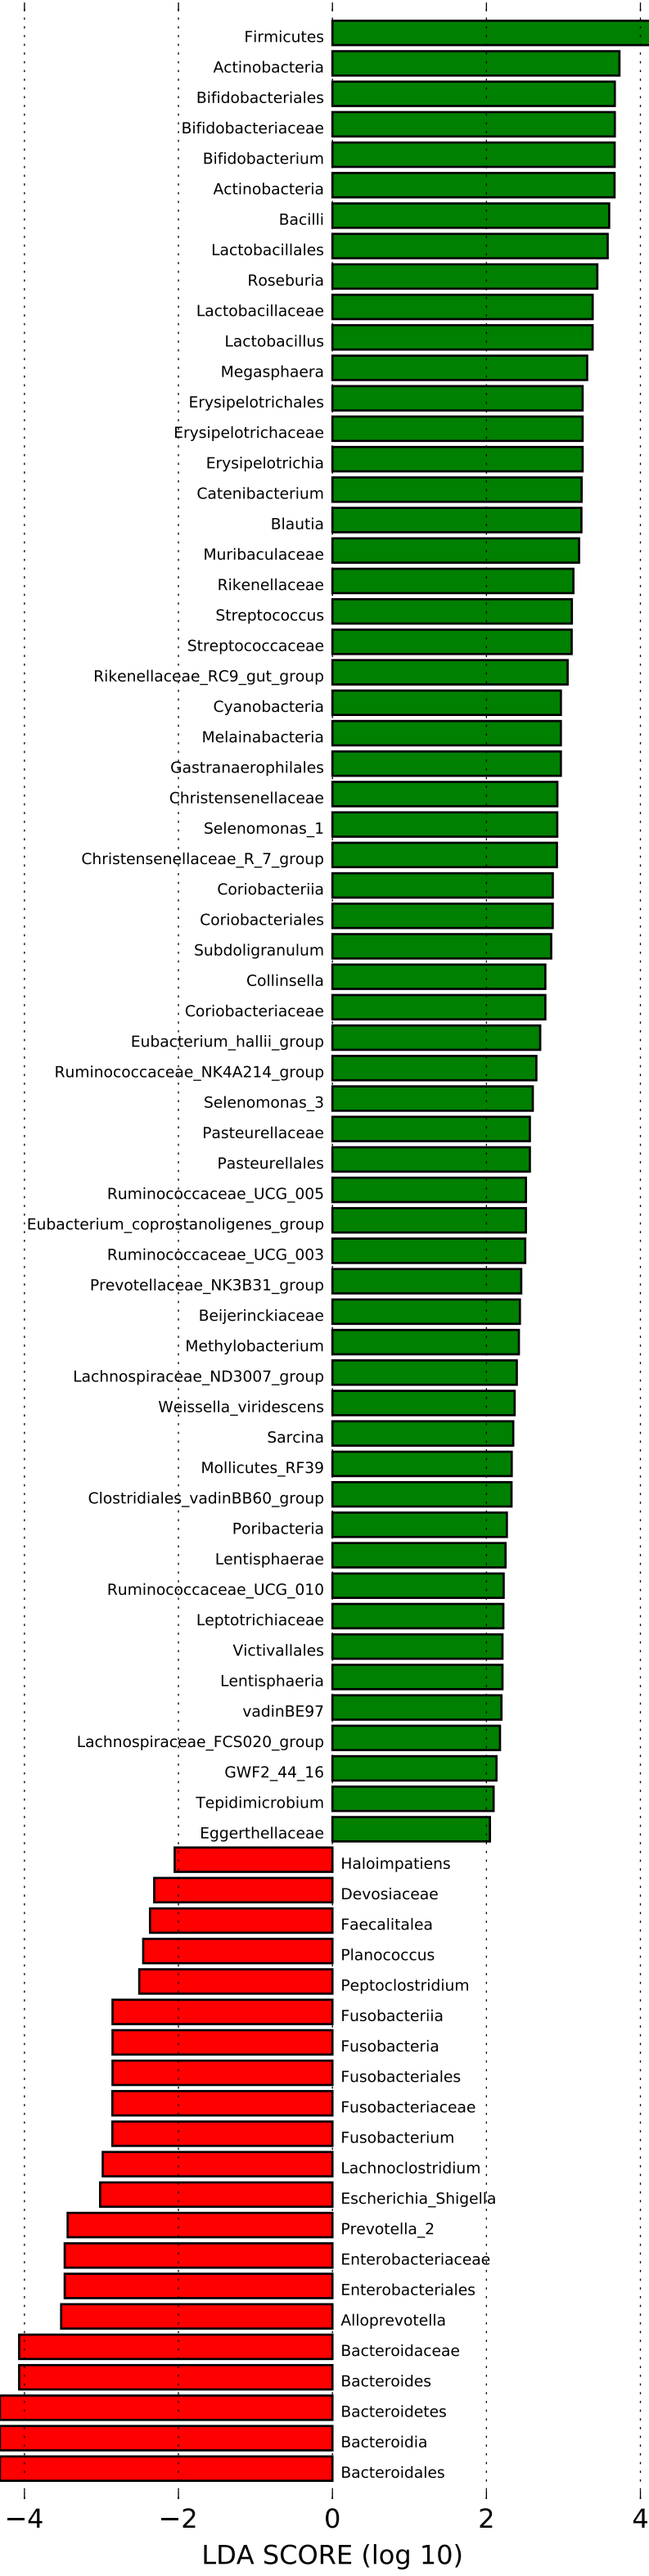



Miao

Uygur

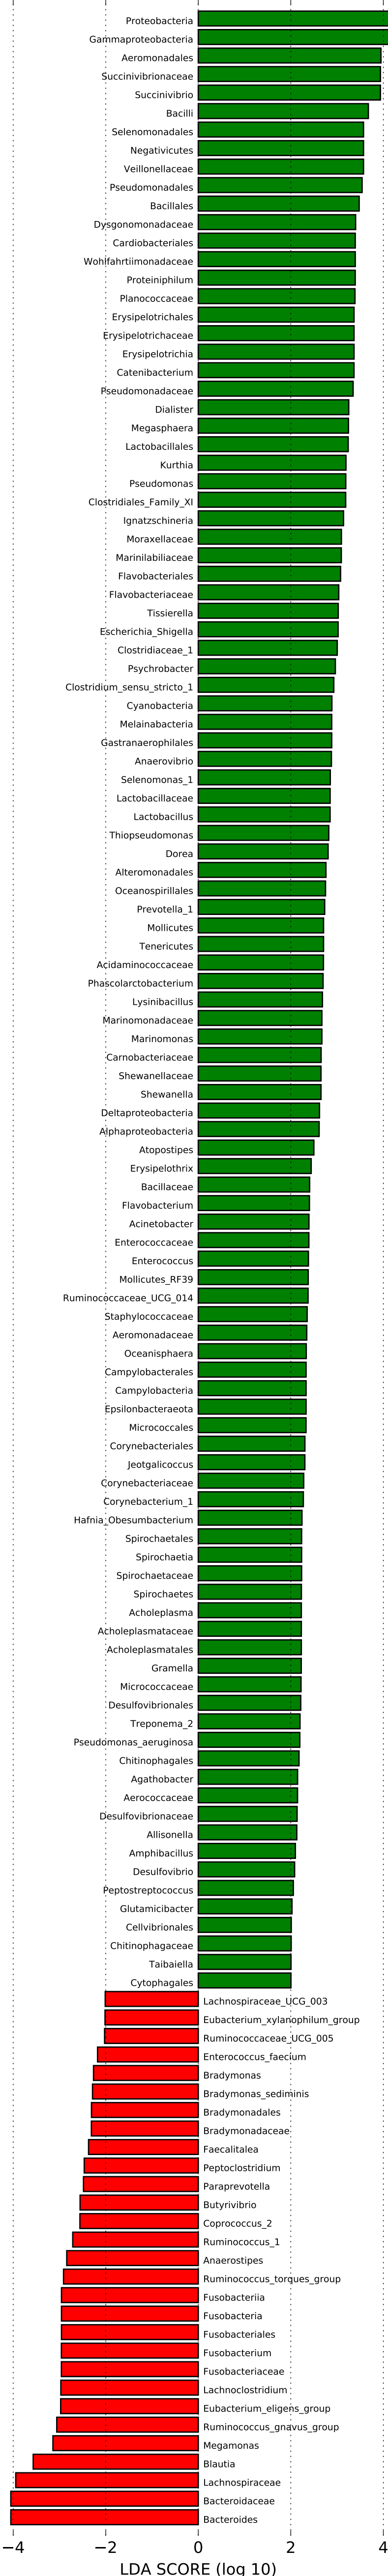

LDA SCORE (log 10)

■ Bai      ■ Miao

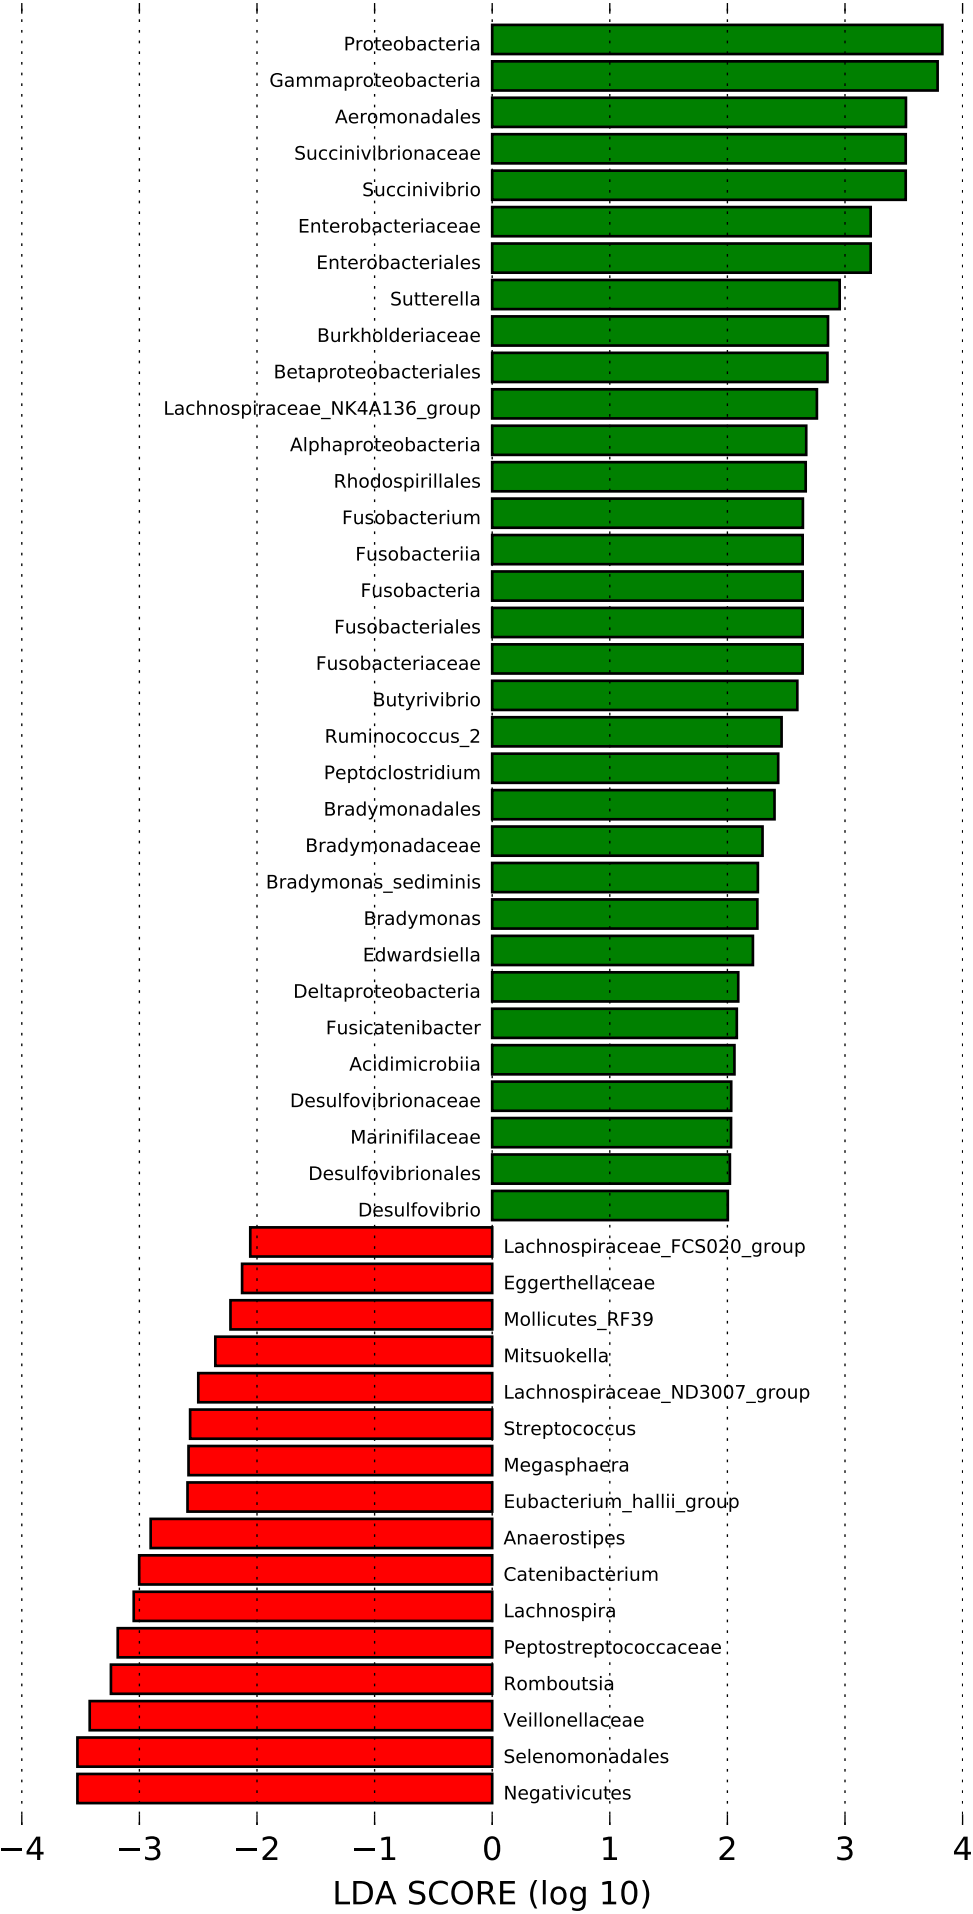

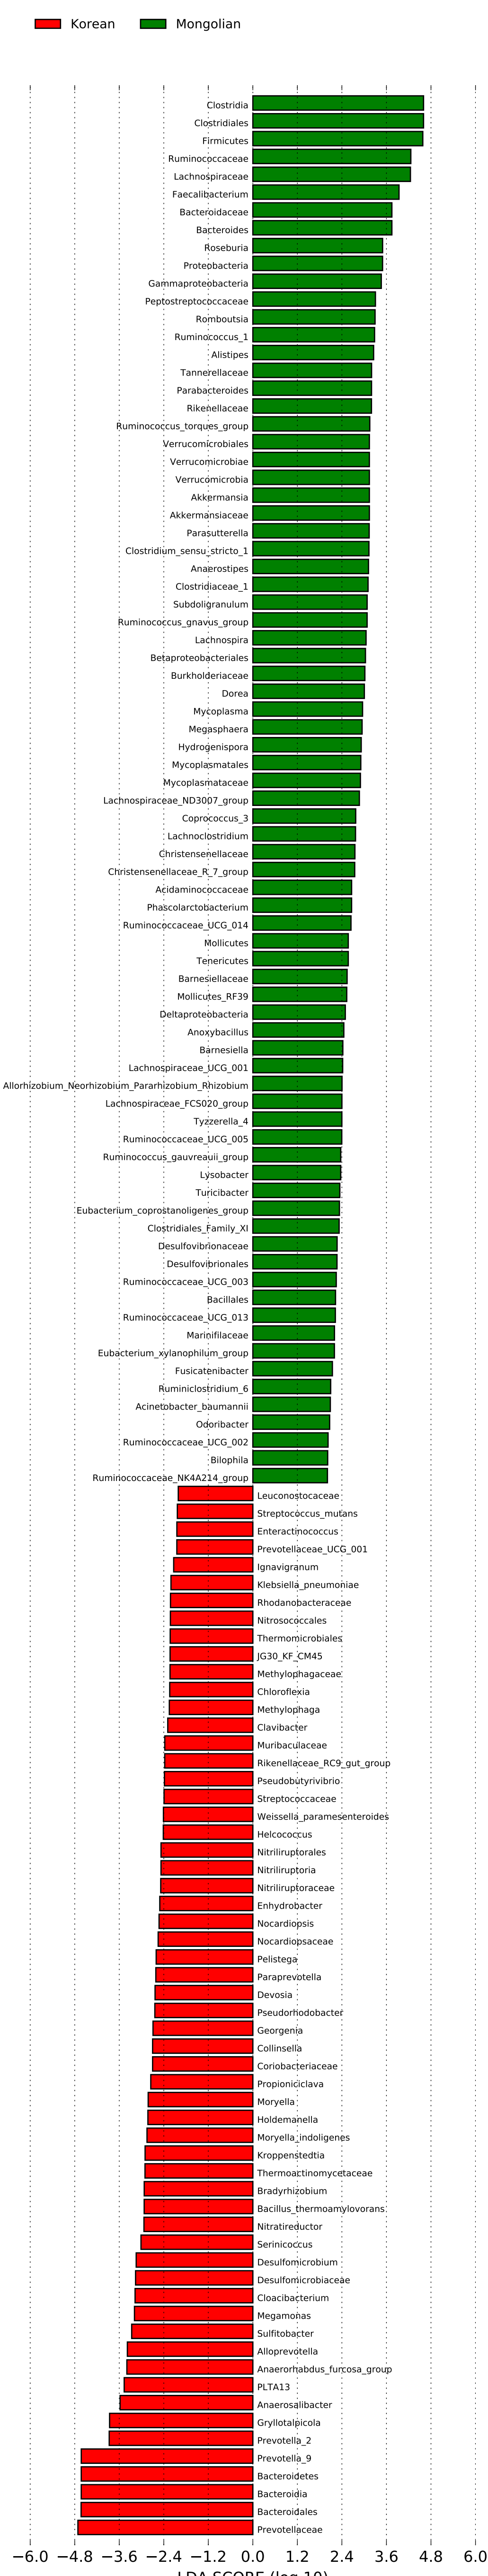

Mongolian Tibetan

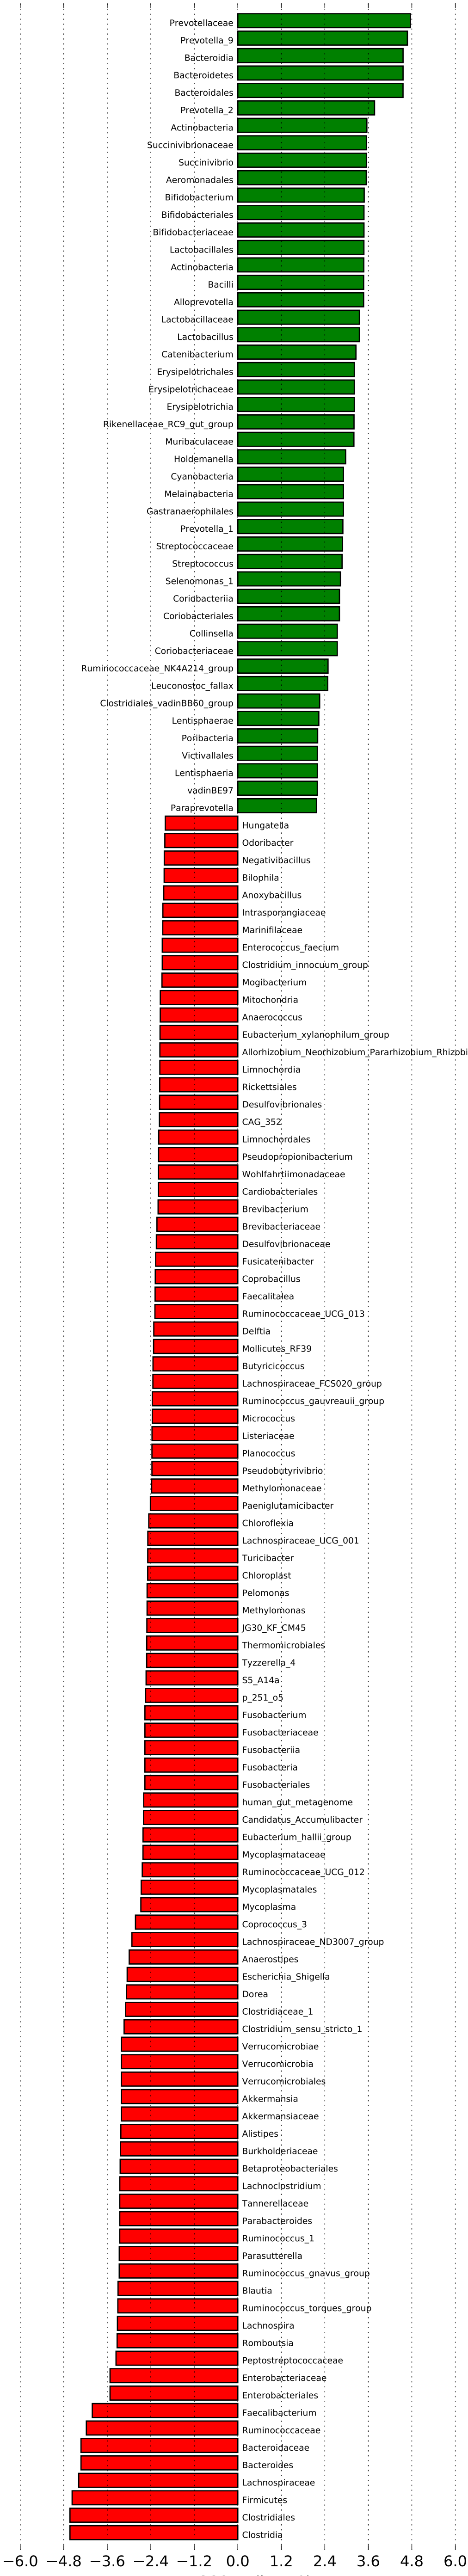

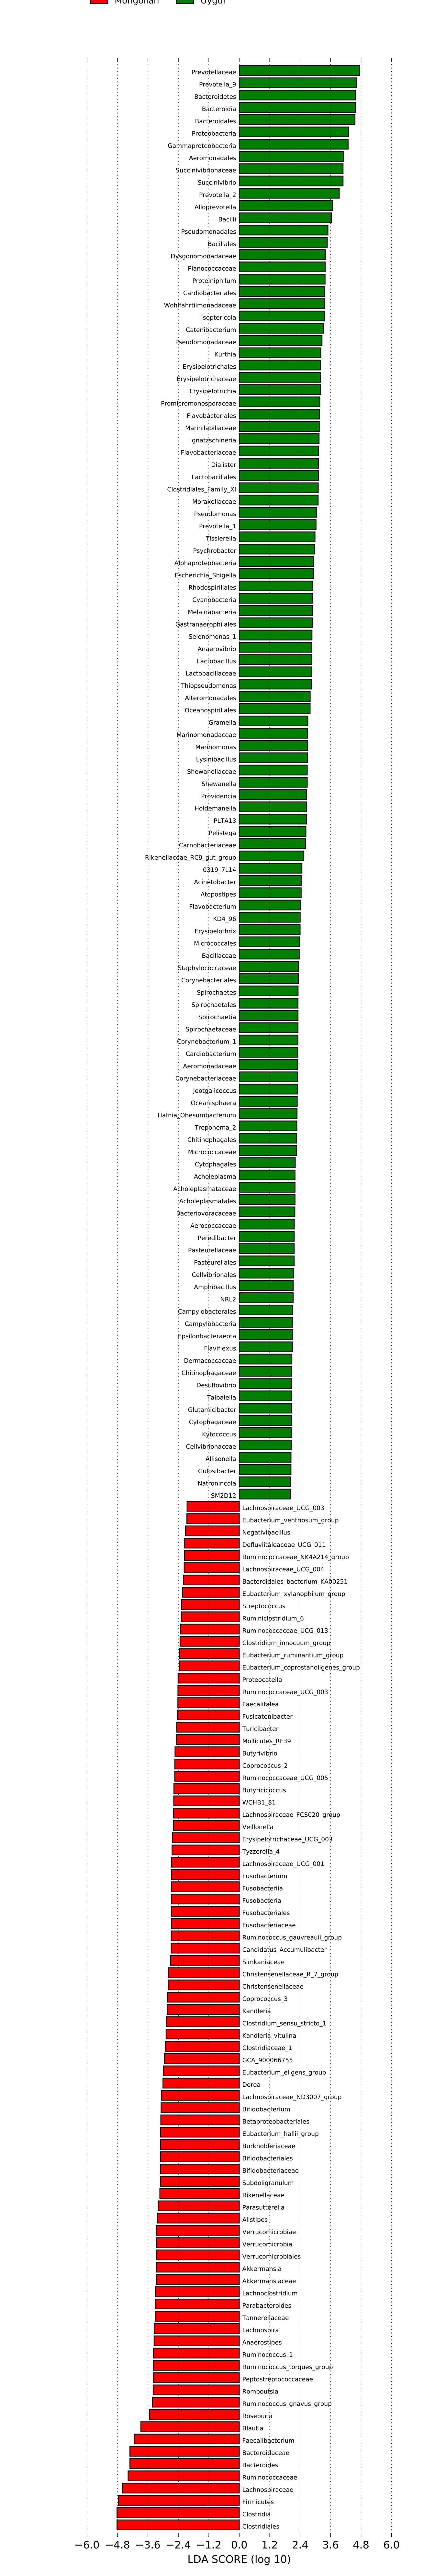

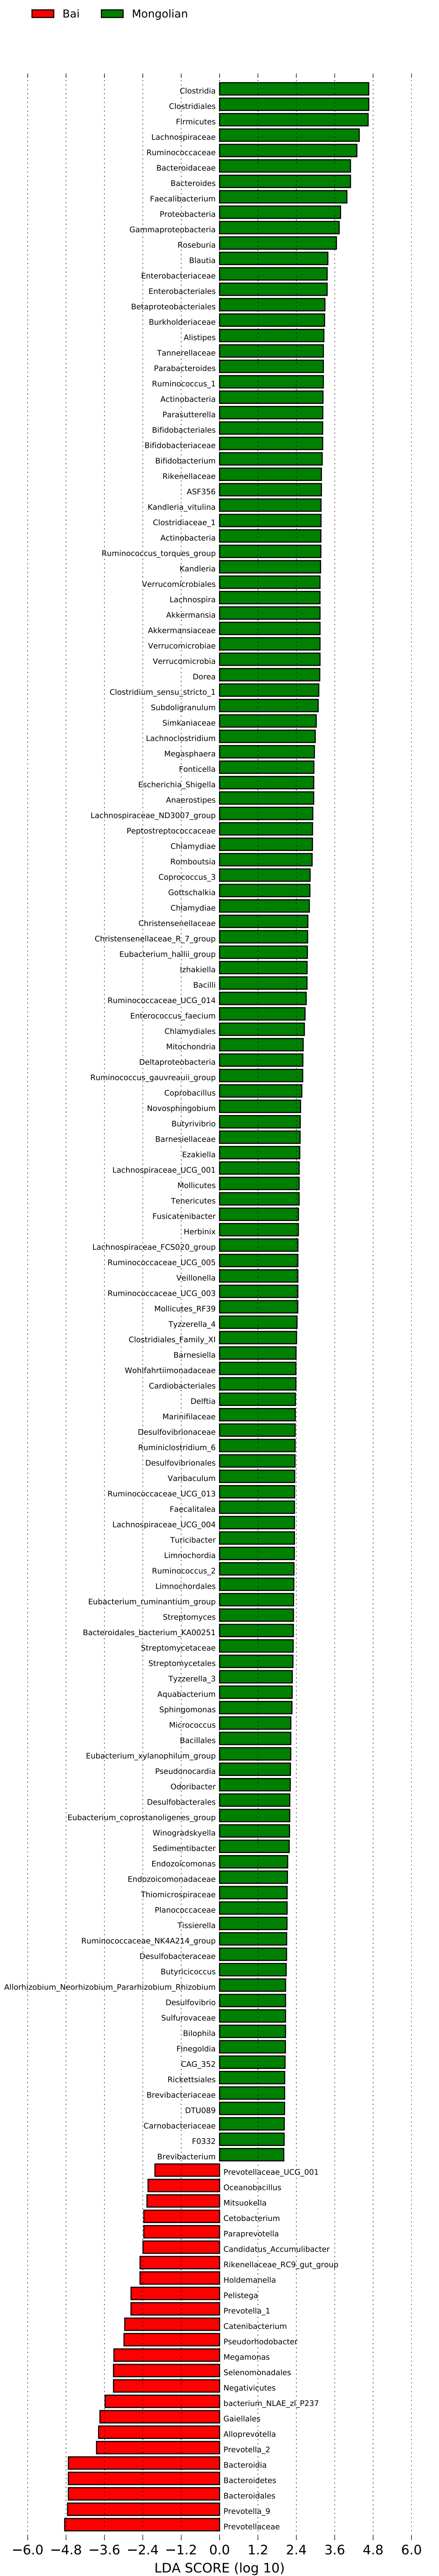



■ Korean■ Tibetan

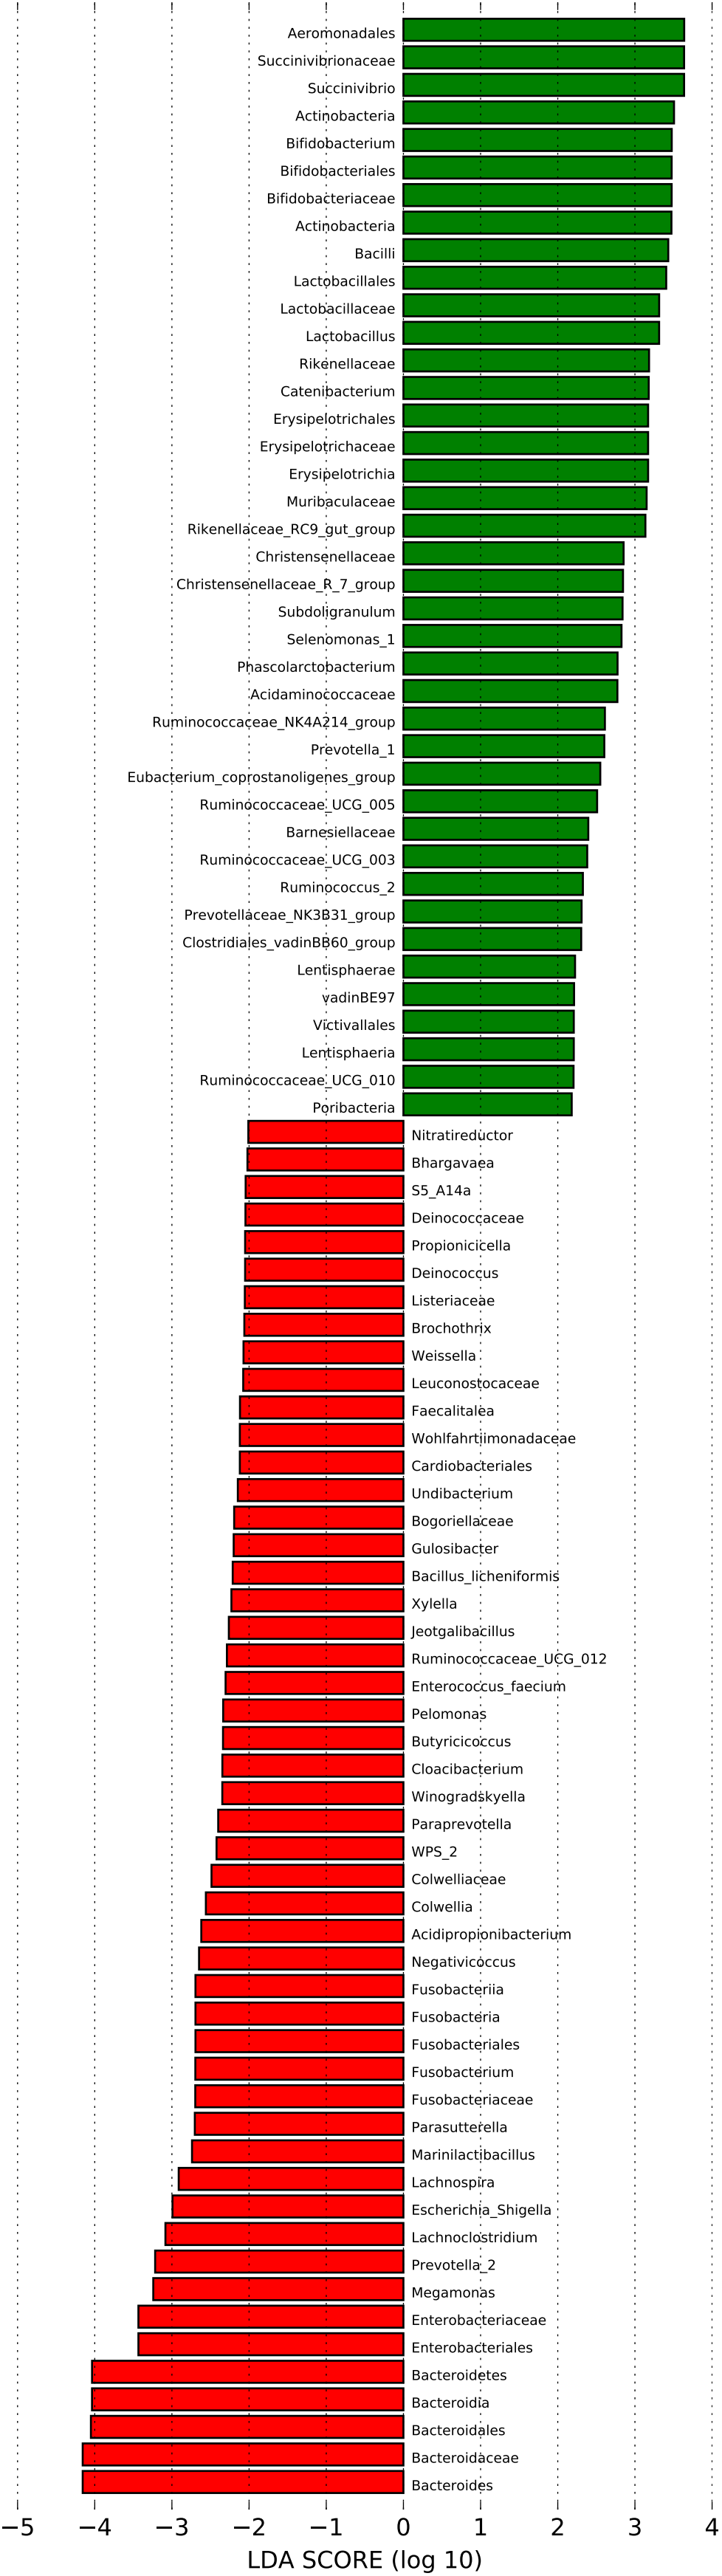

Korean

Uygur

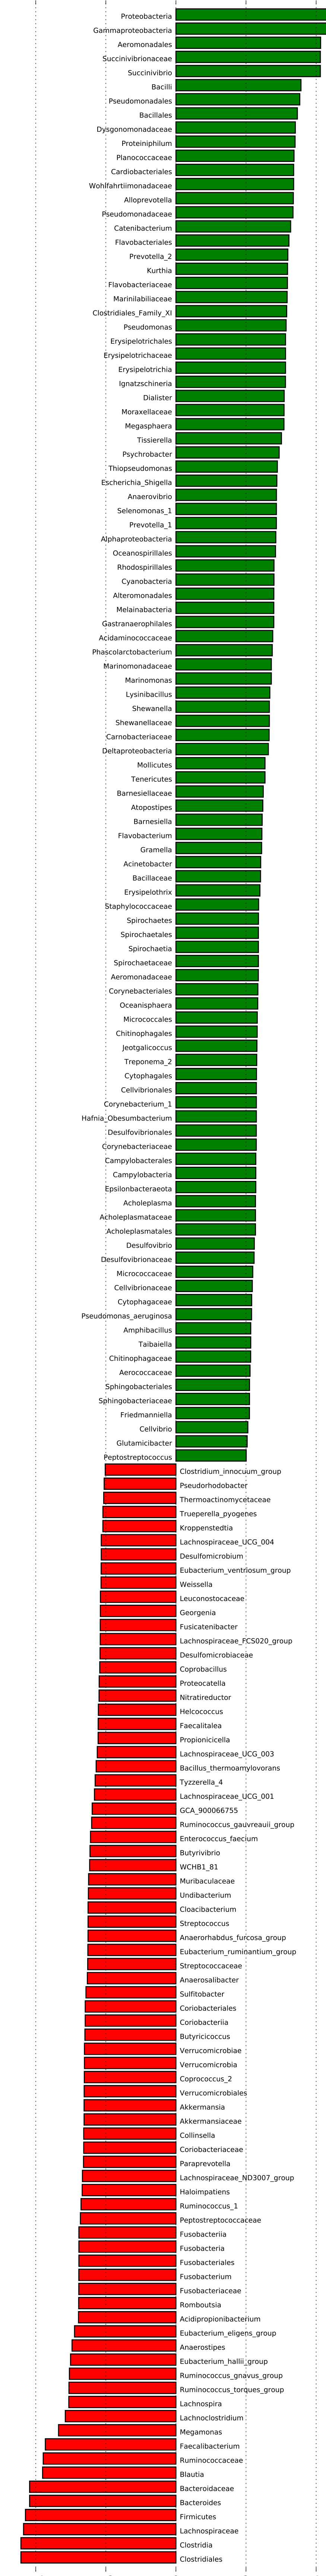

LDA SCORE (log 10)



Bai Korean

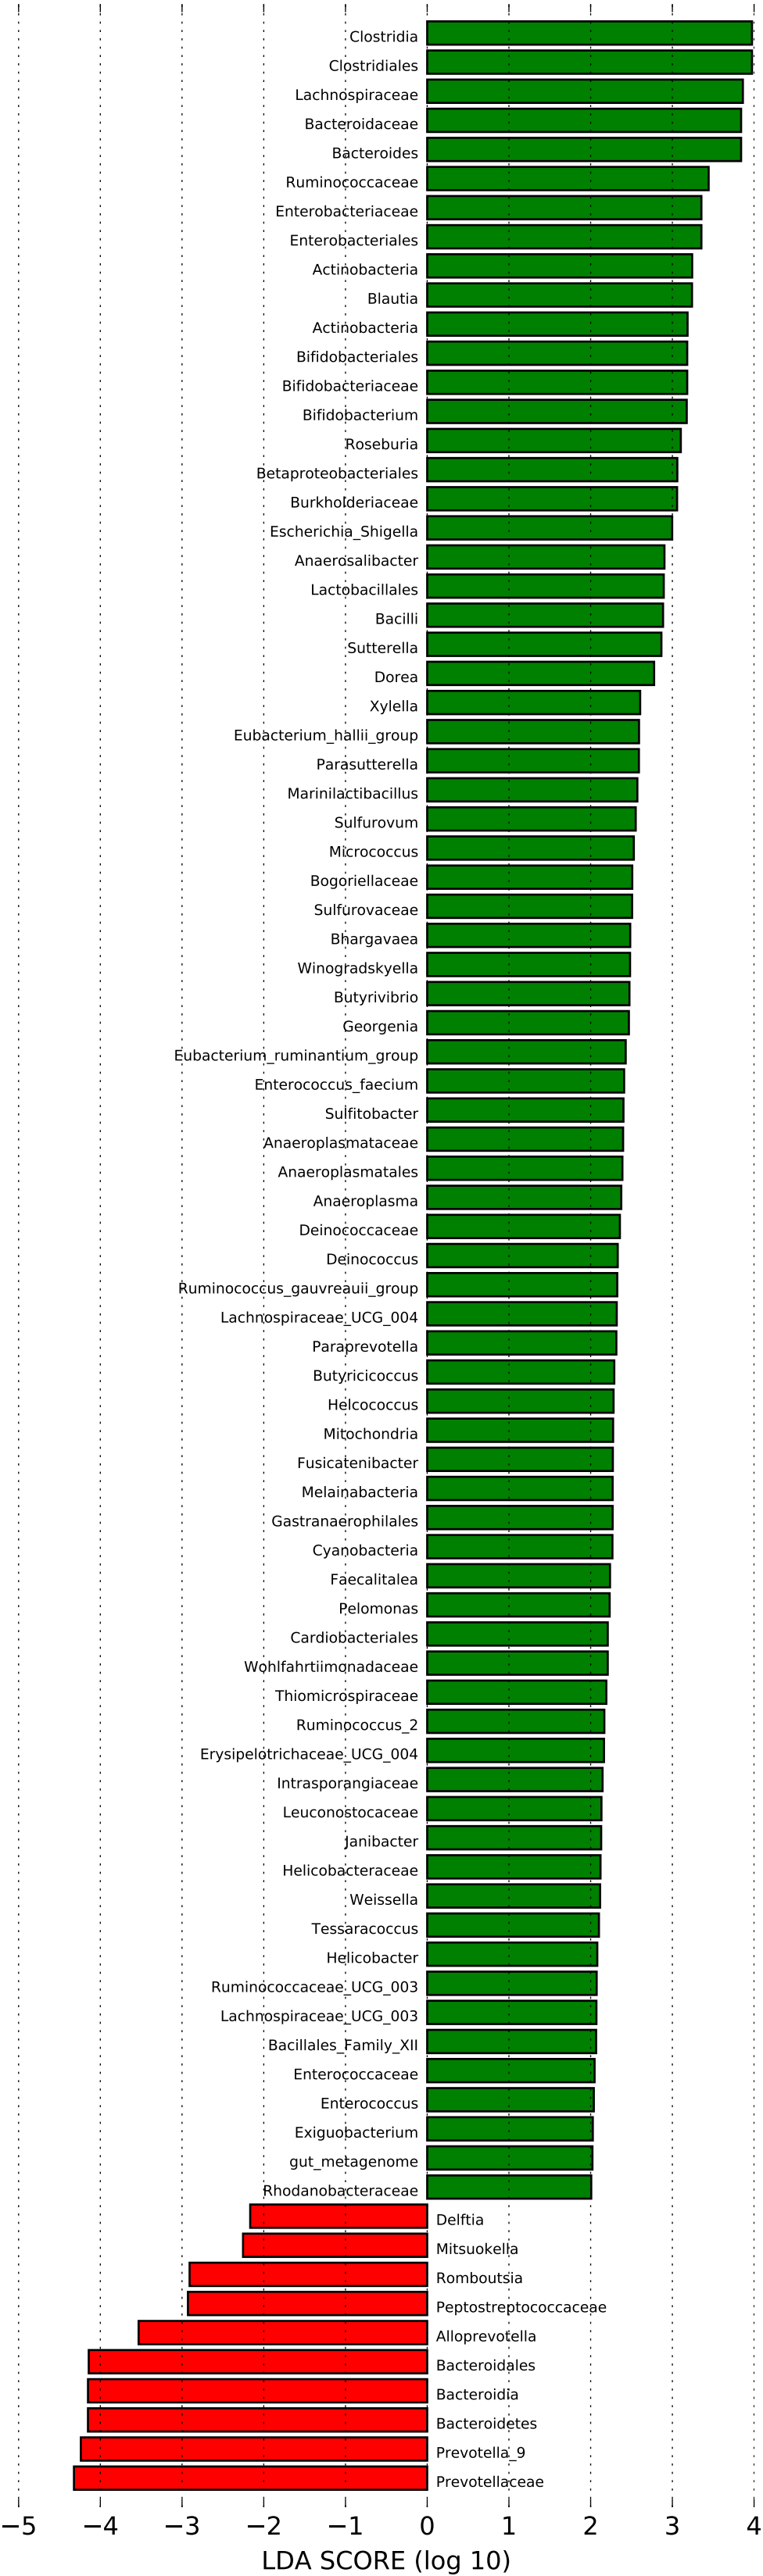

Tibetan Uygur

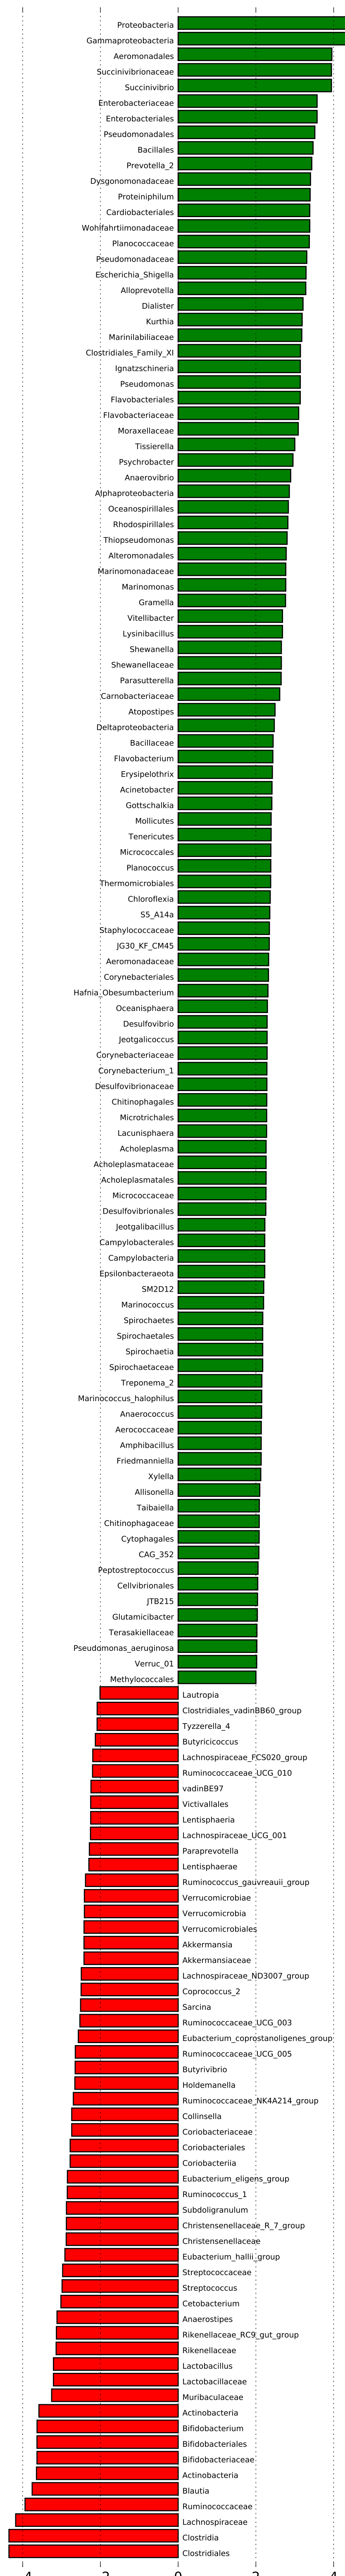

LDA SCORE (log 10)

Bai Tibetan

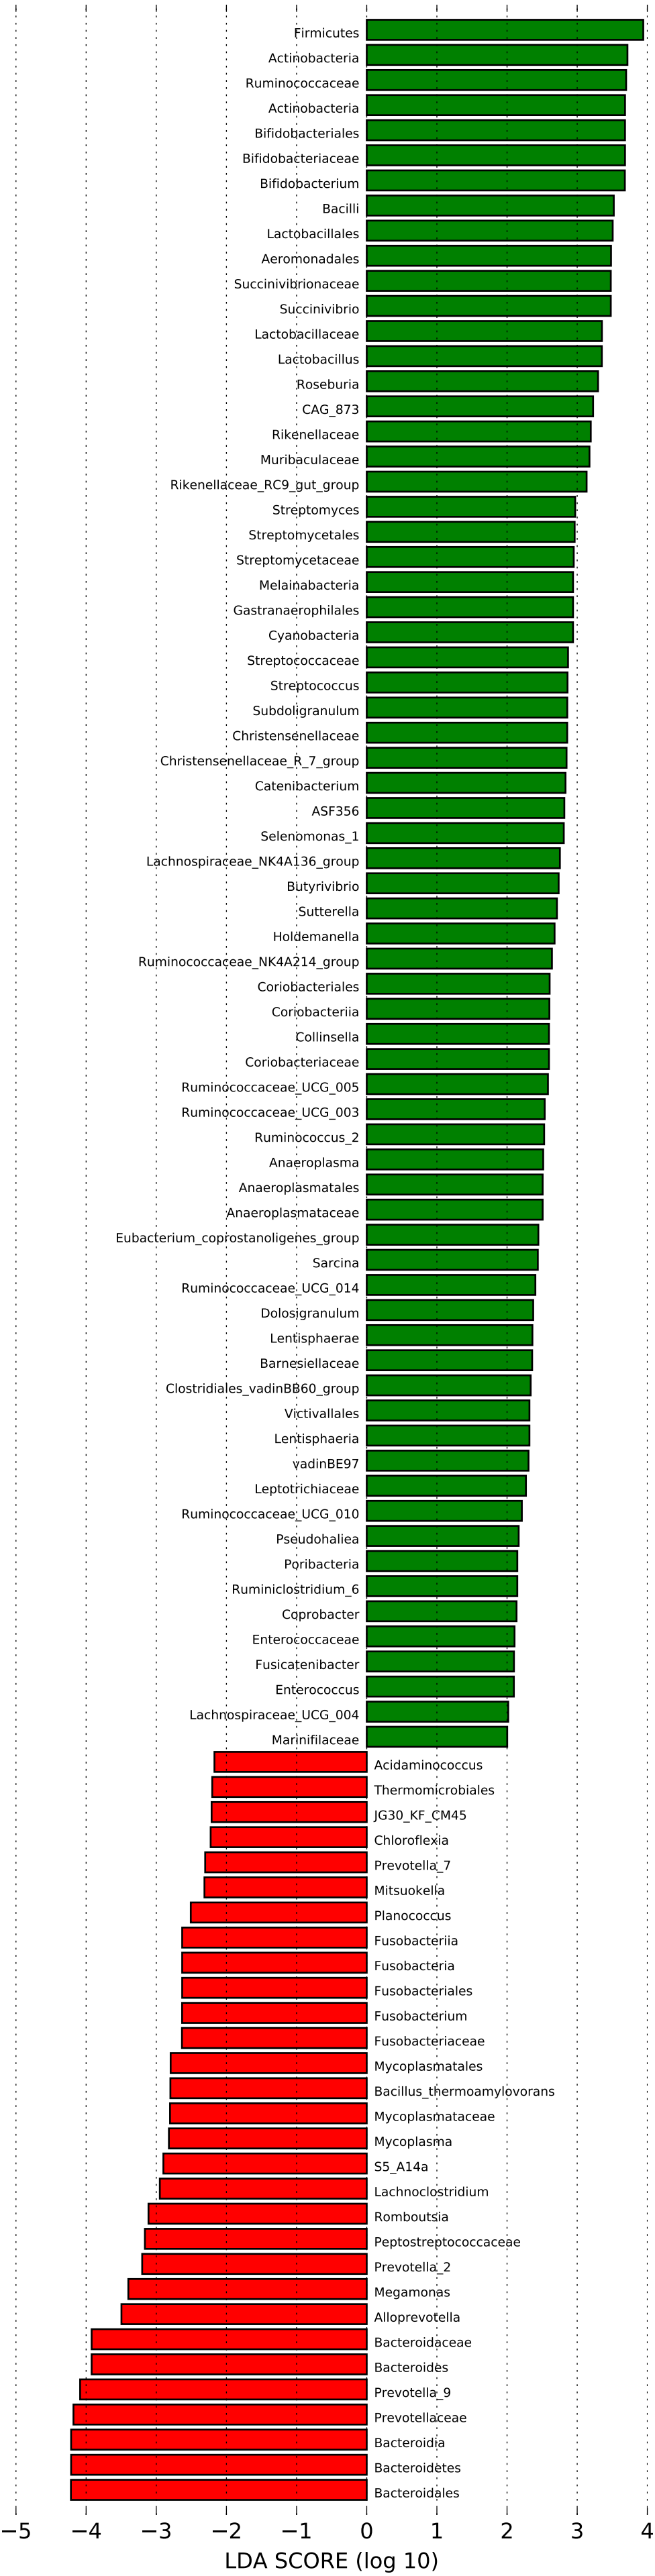

Bai

Uygur

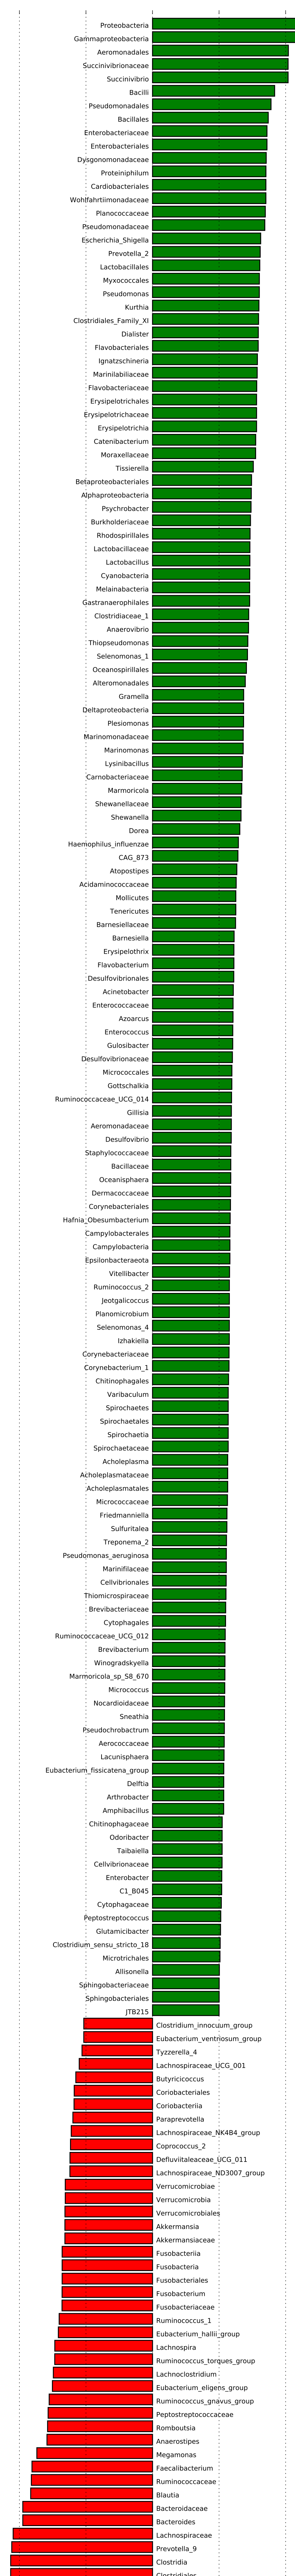

Hui

Miao

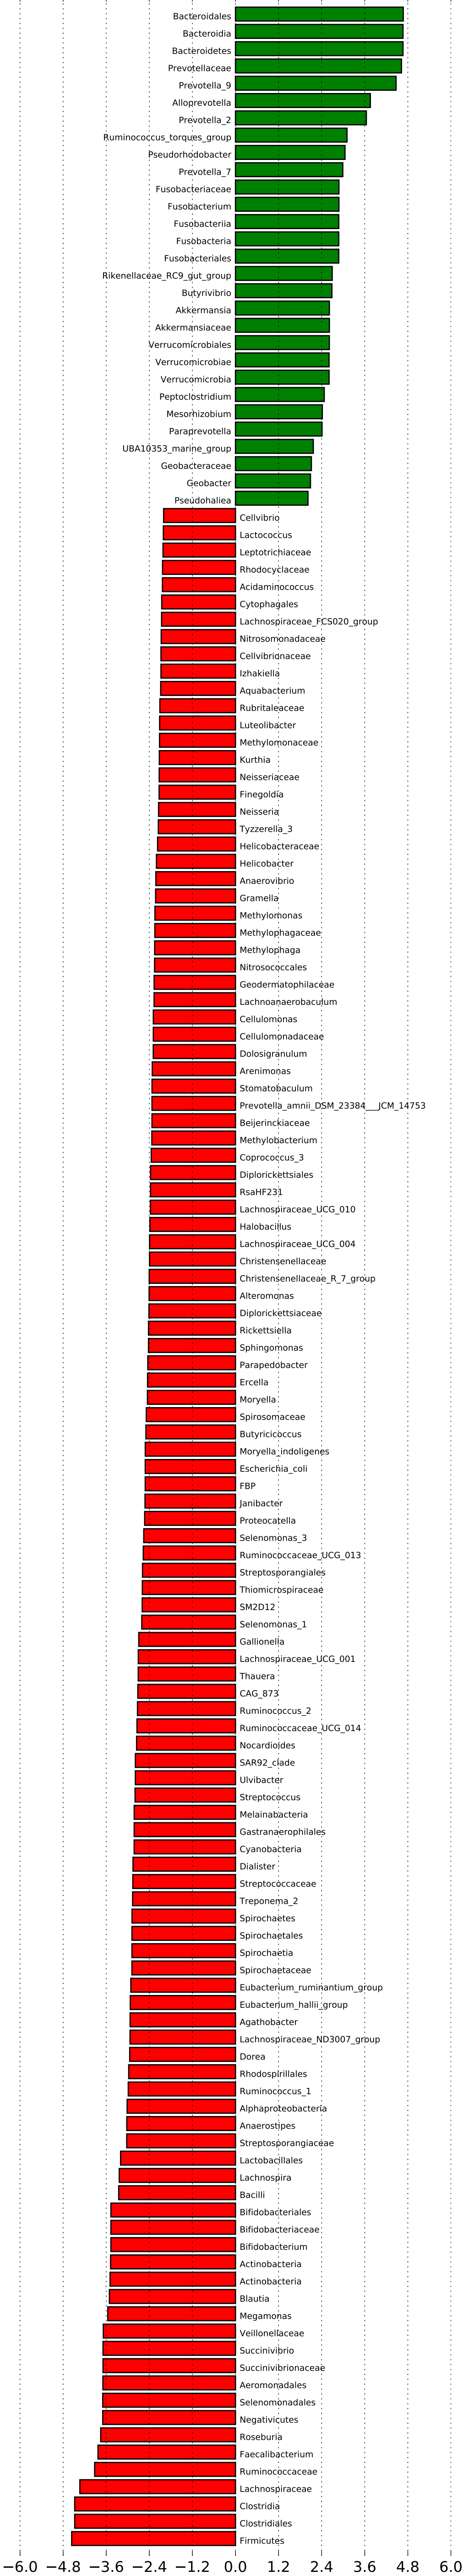

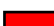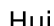

Hui Mongolian

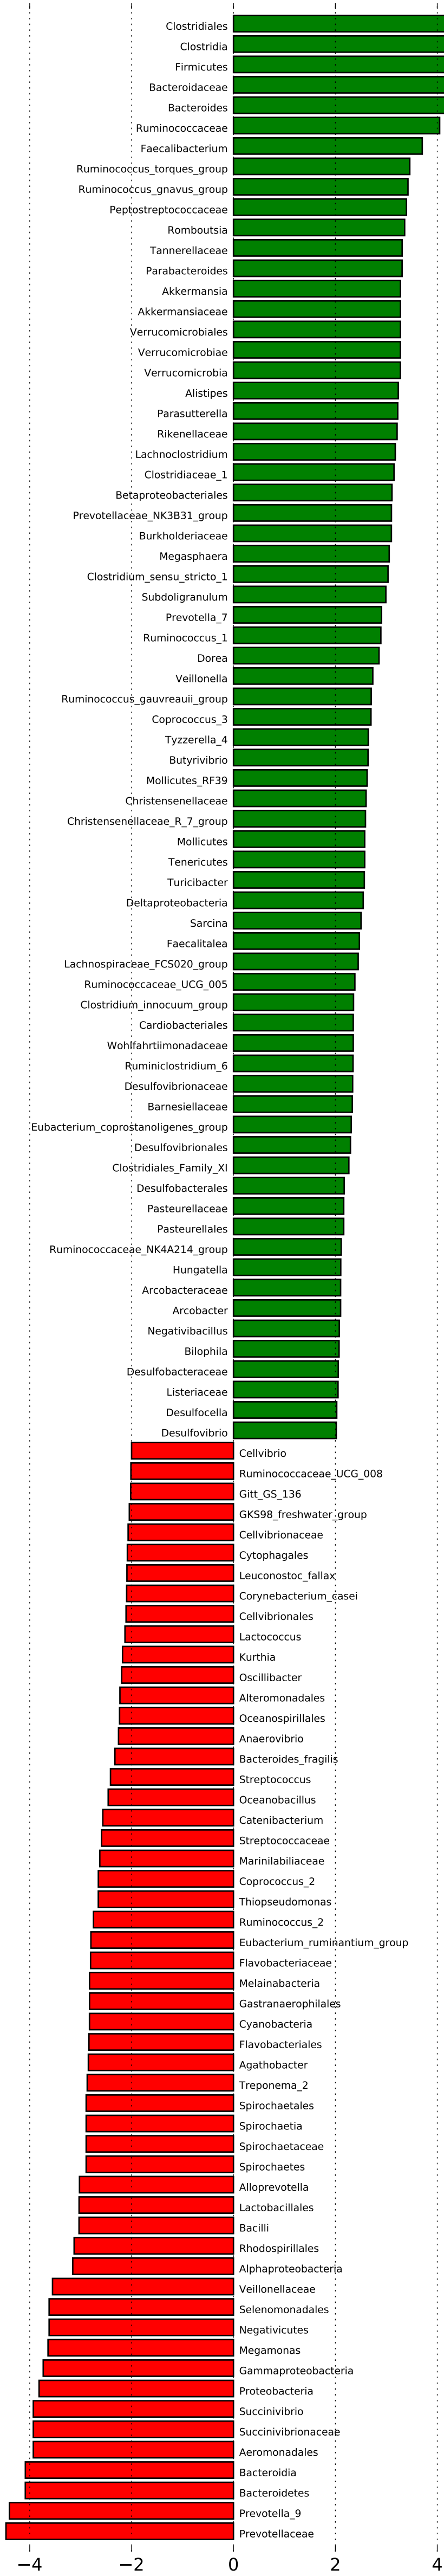

Hui Korean

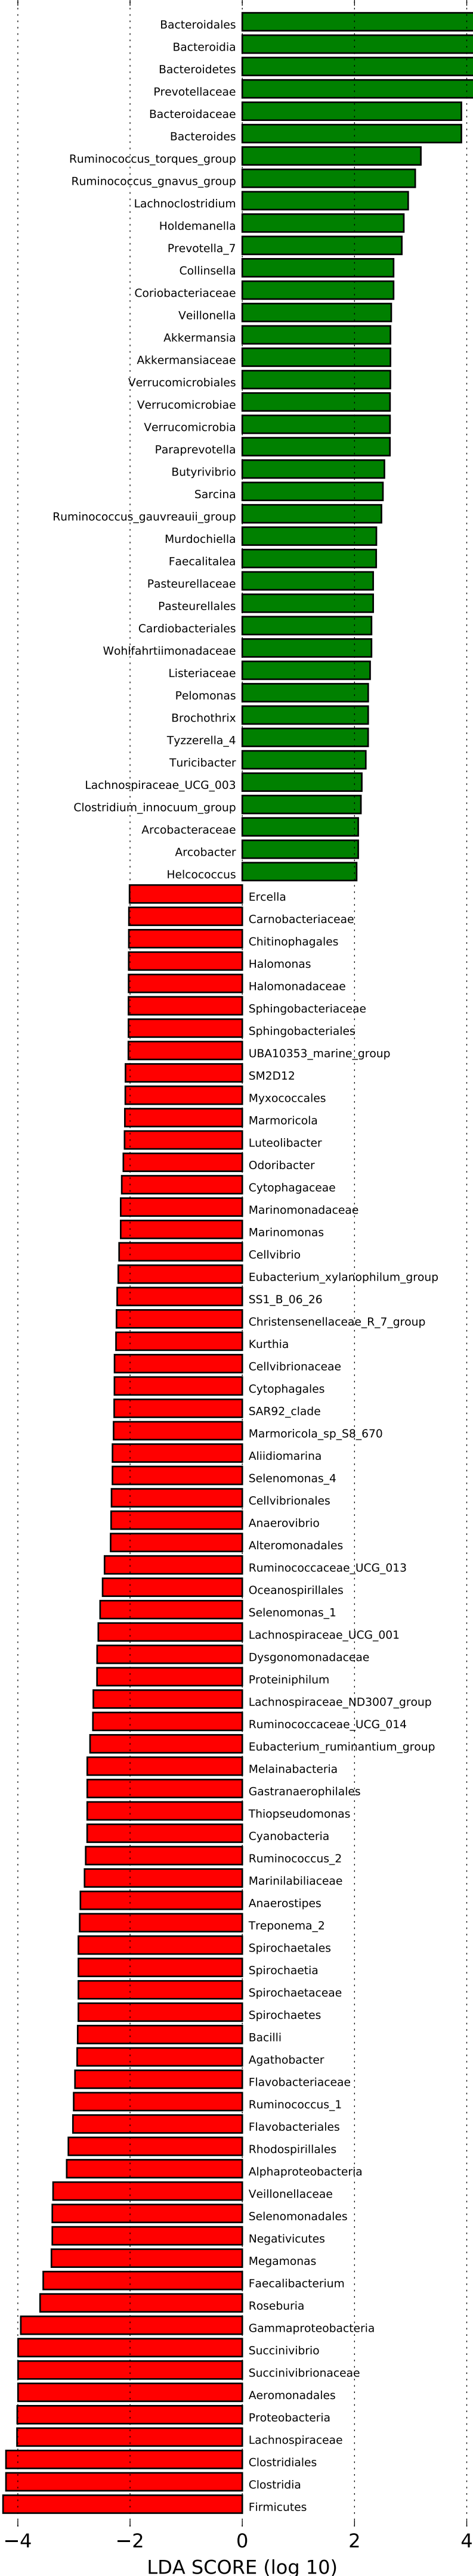



Hui Tibetan

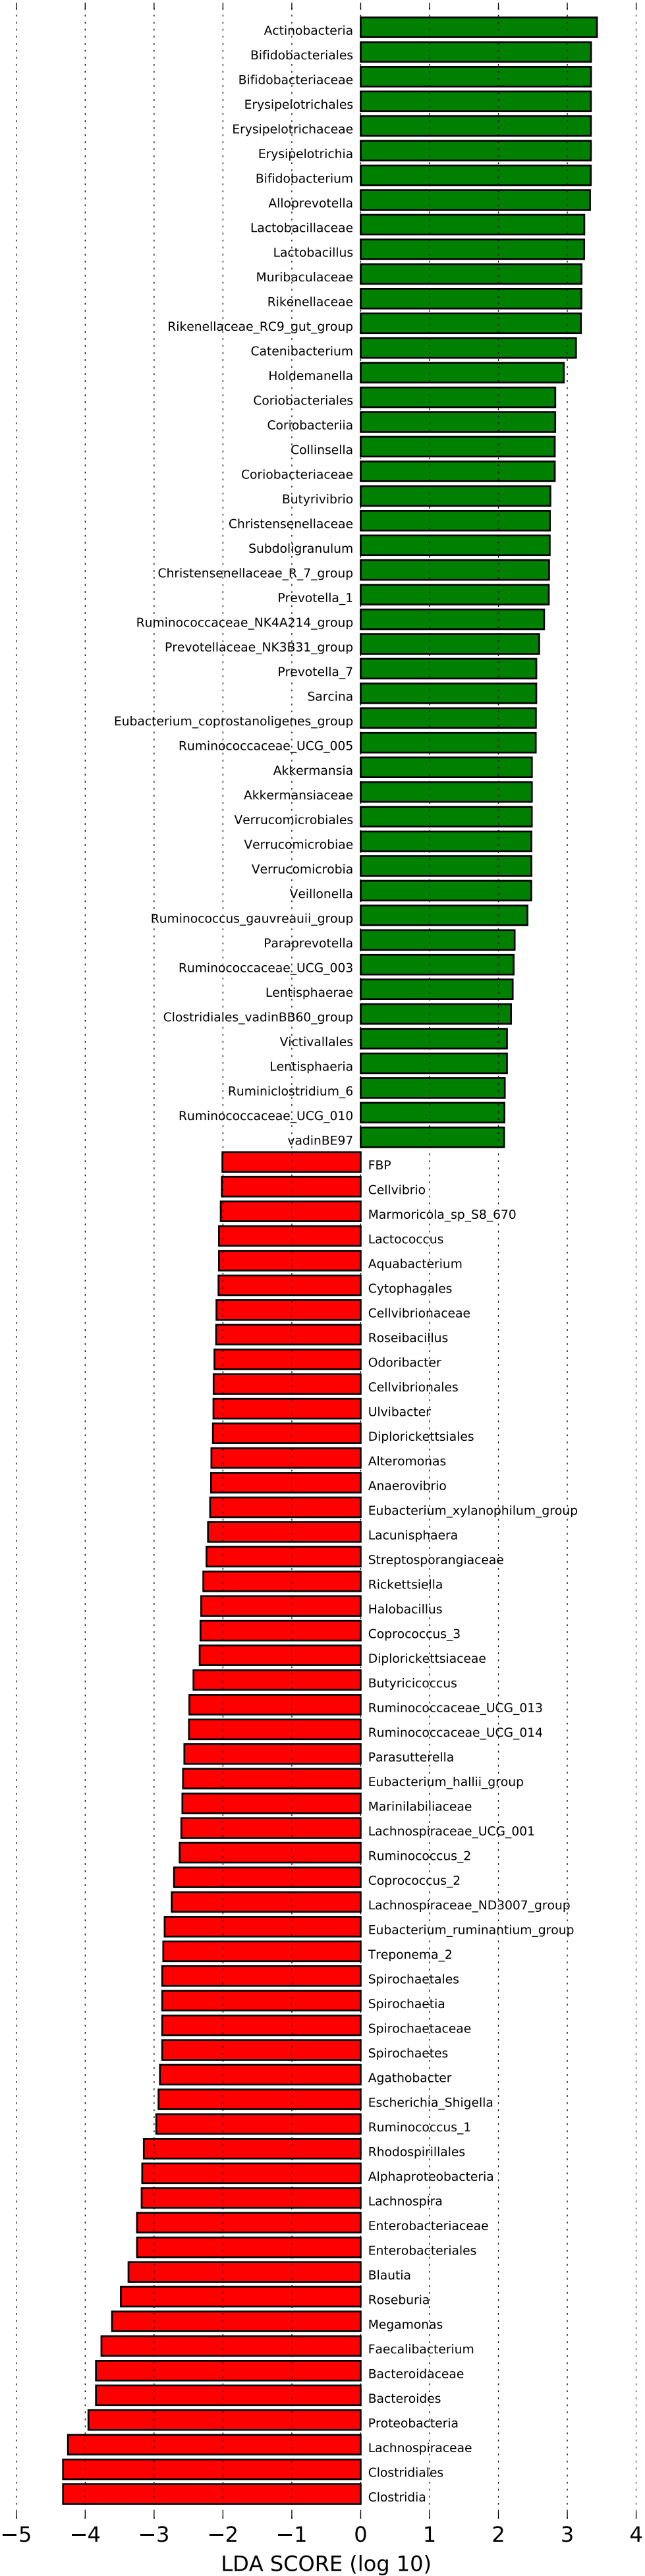



Hui

Uygur

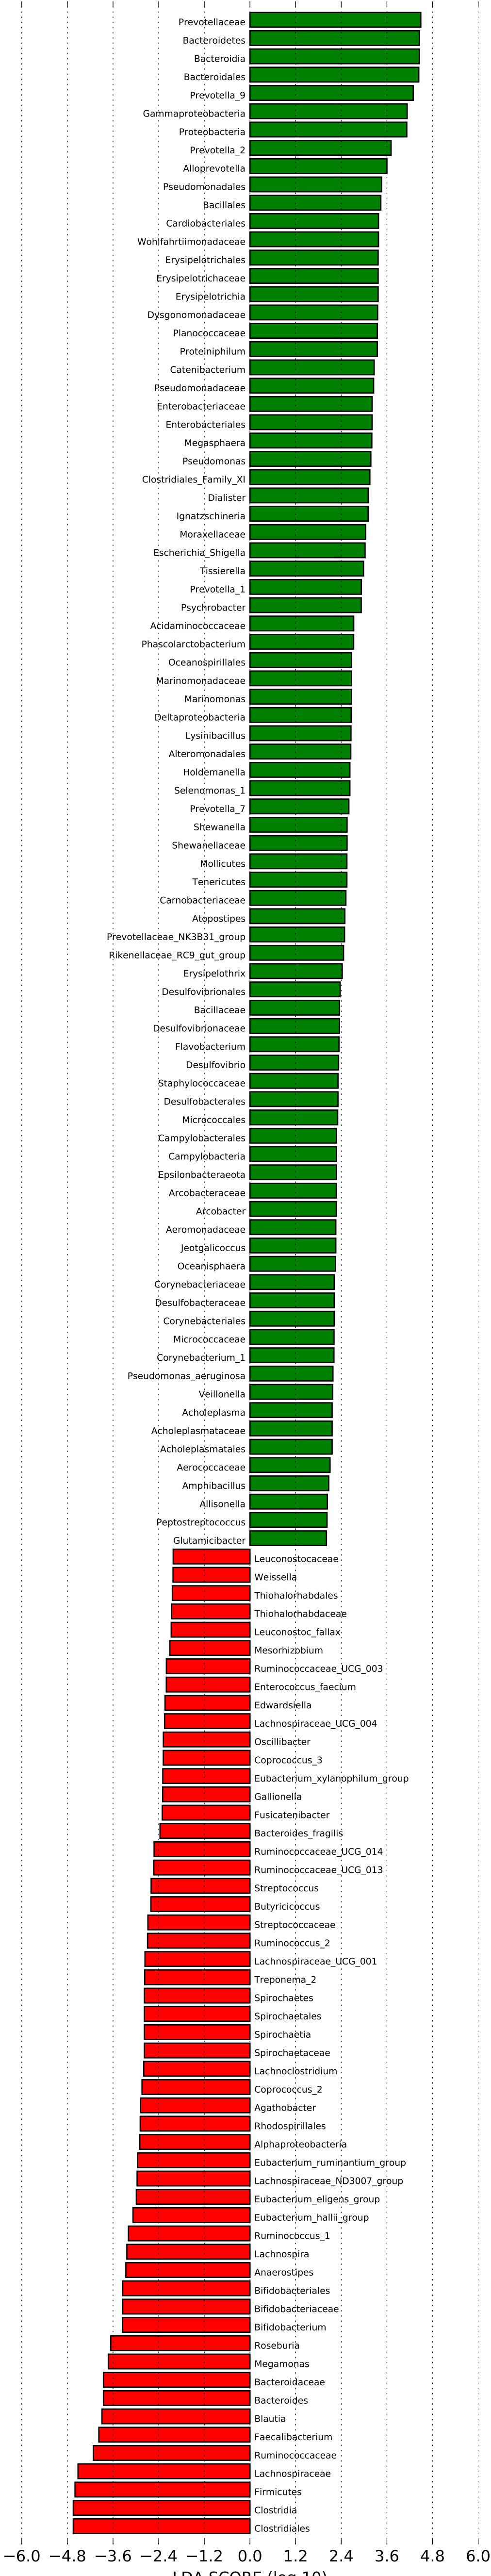

Bai Hui

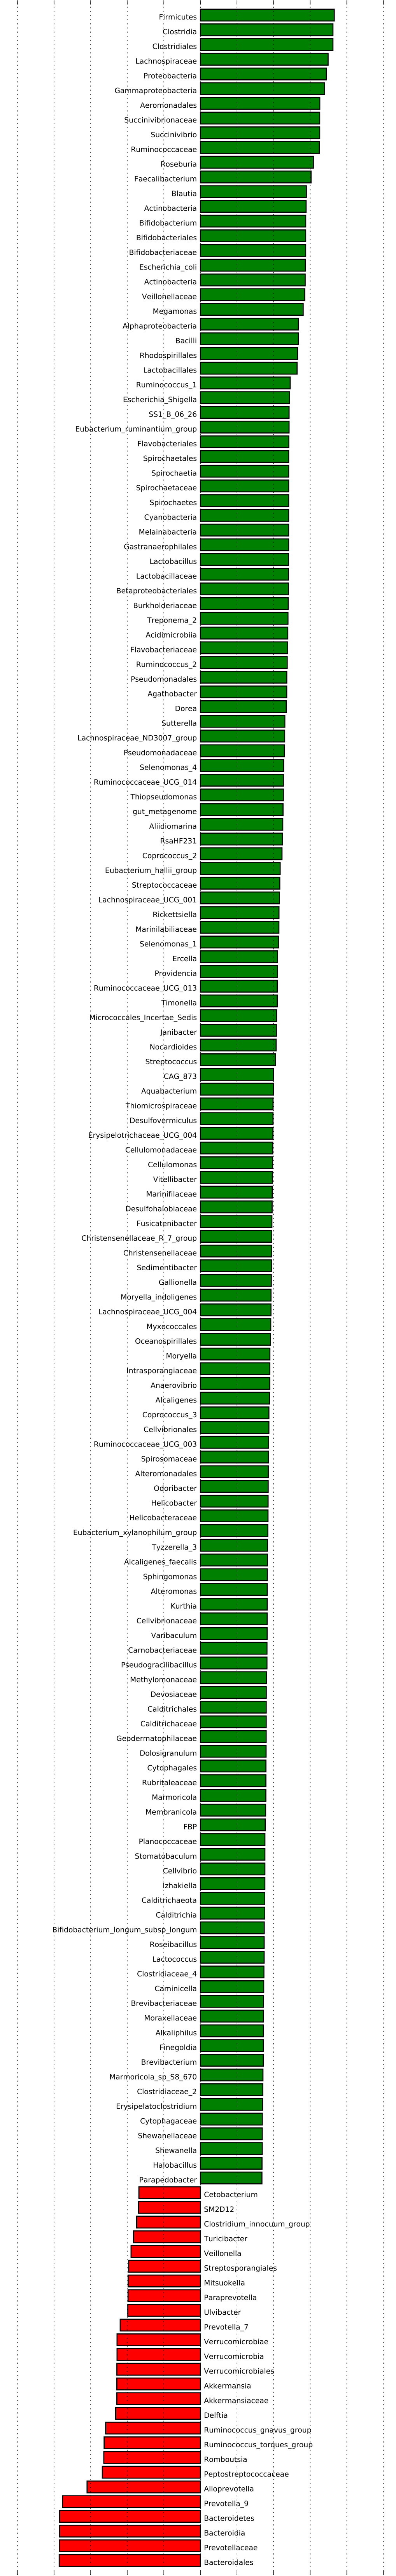

Miao Mongolian

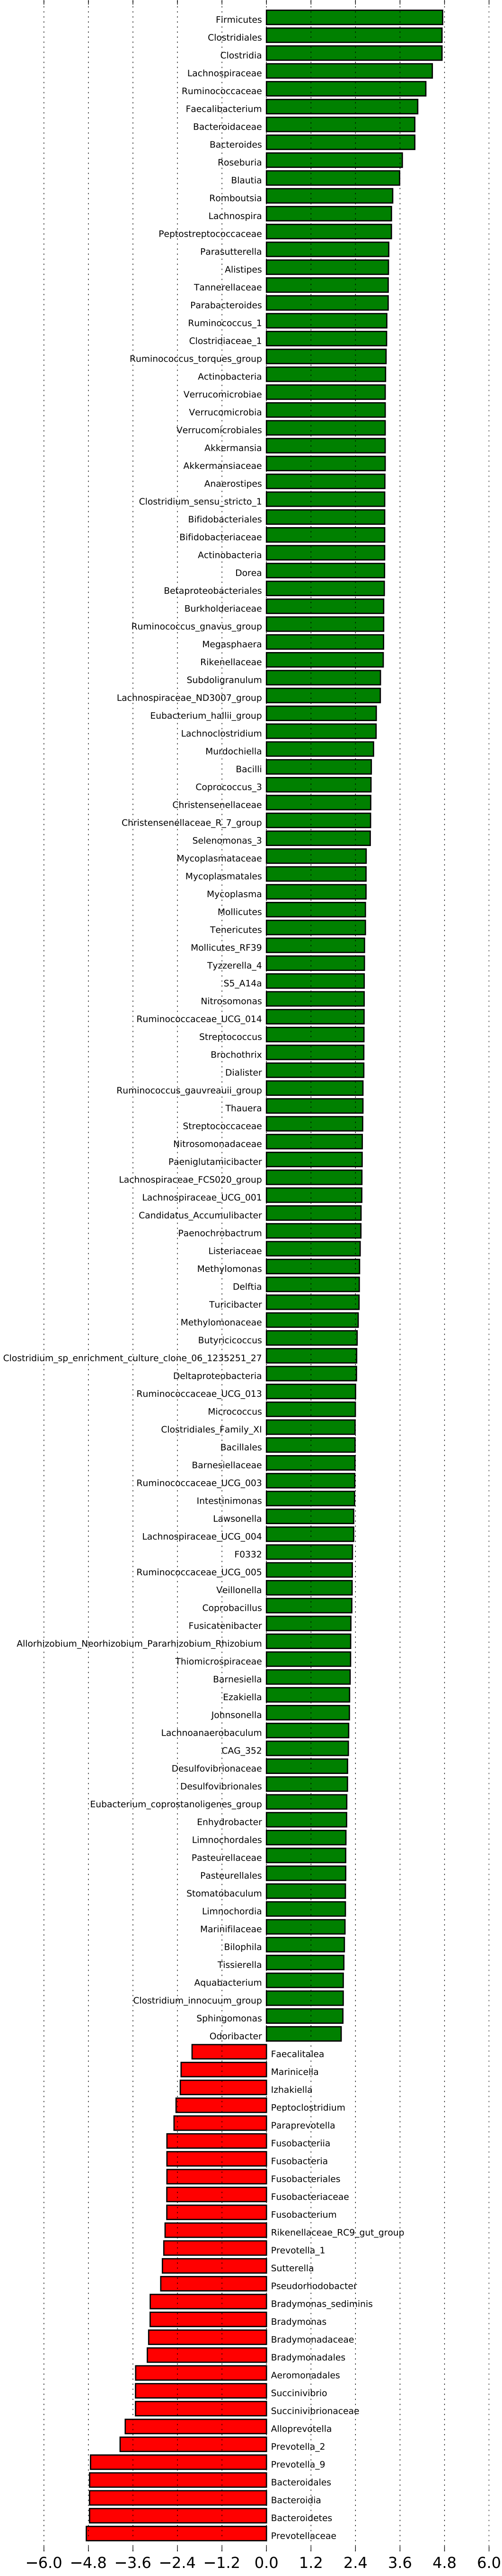

■ Han ■ Hui

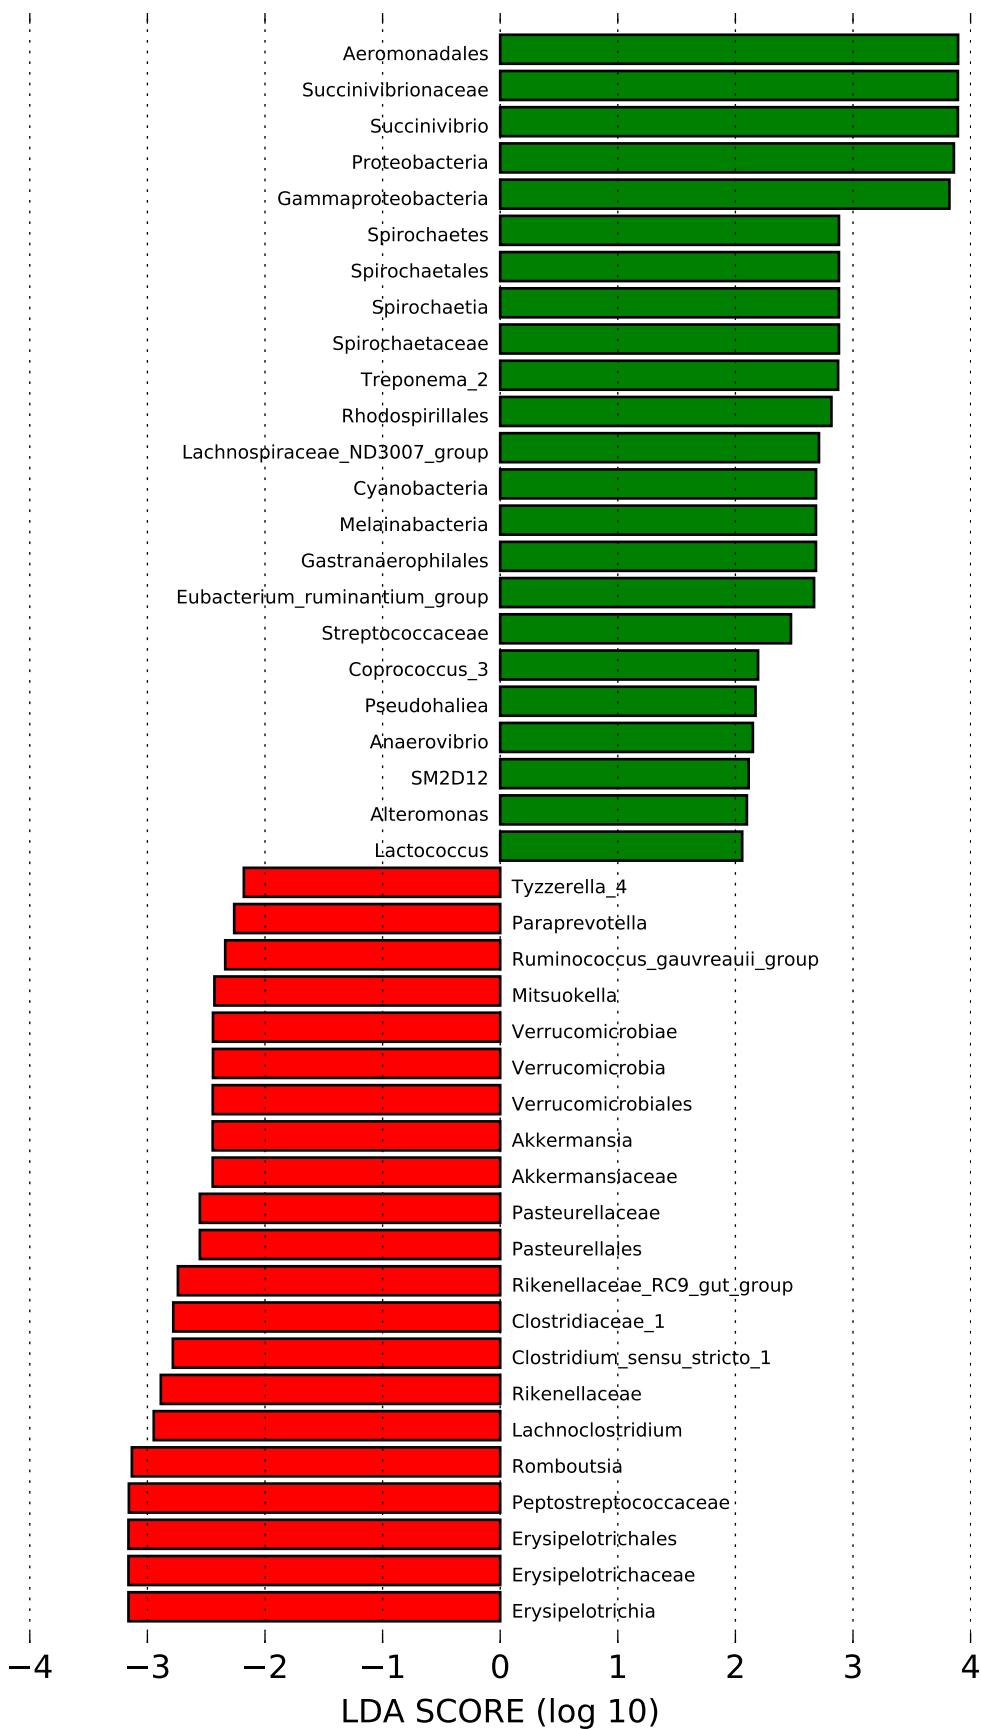

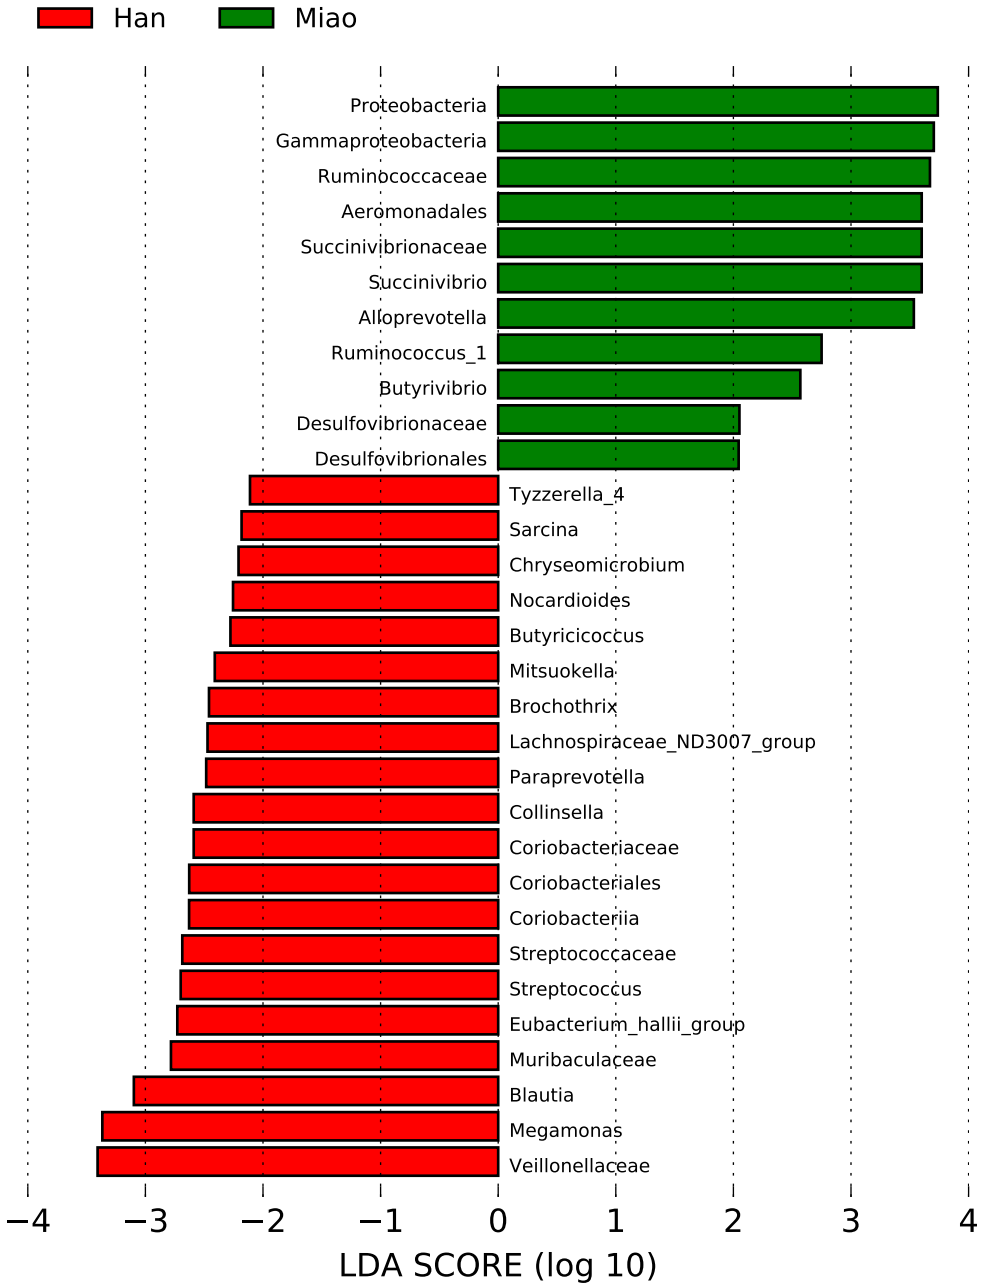

■ Han
■ Tibetan

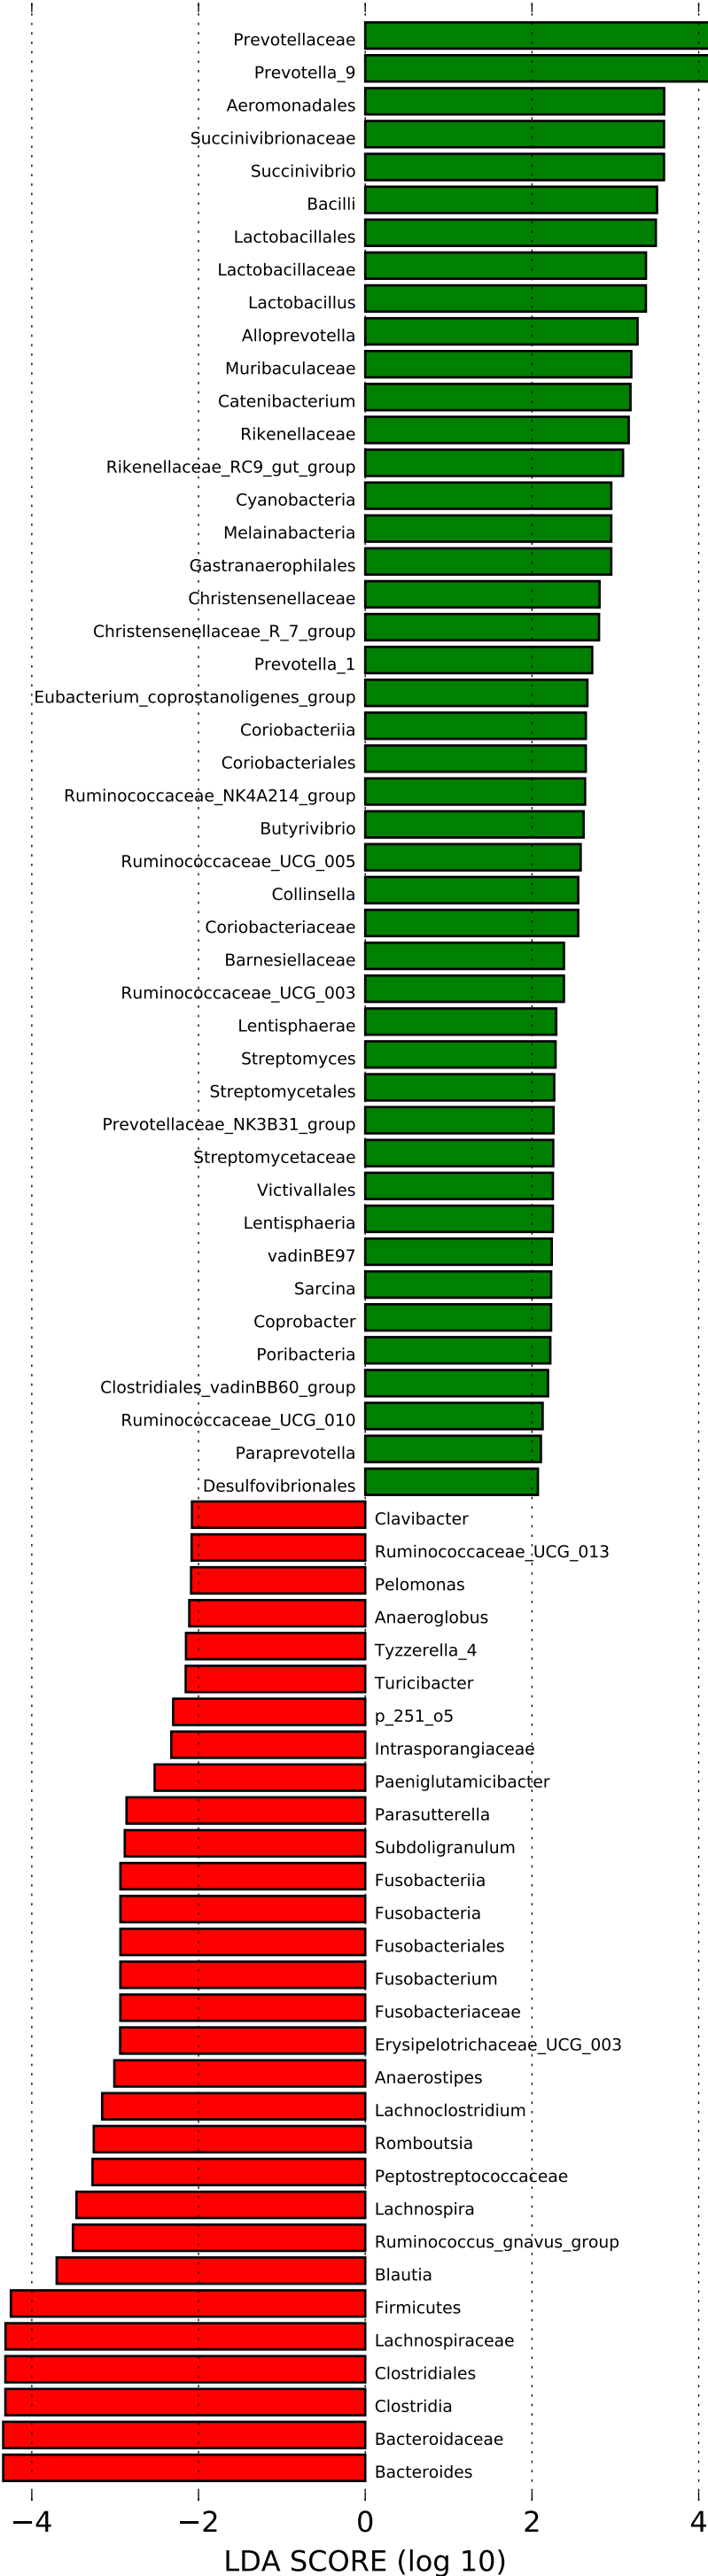

■ Han ■ Uygur

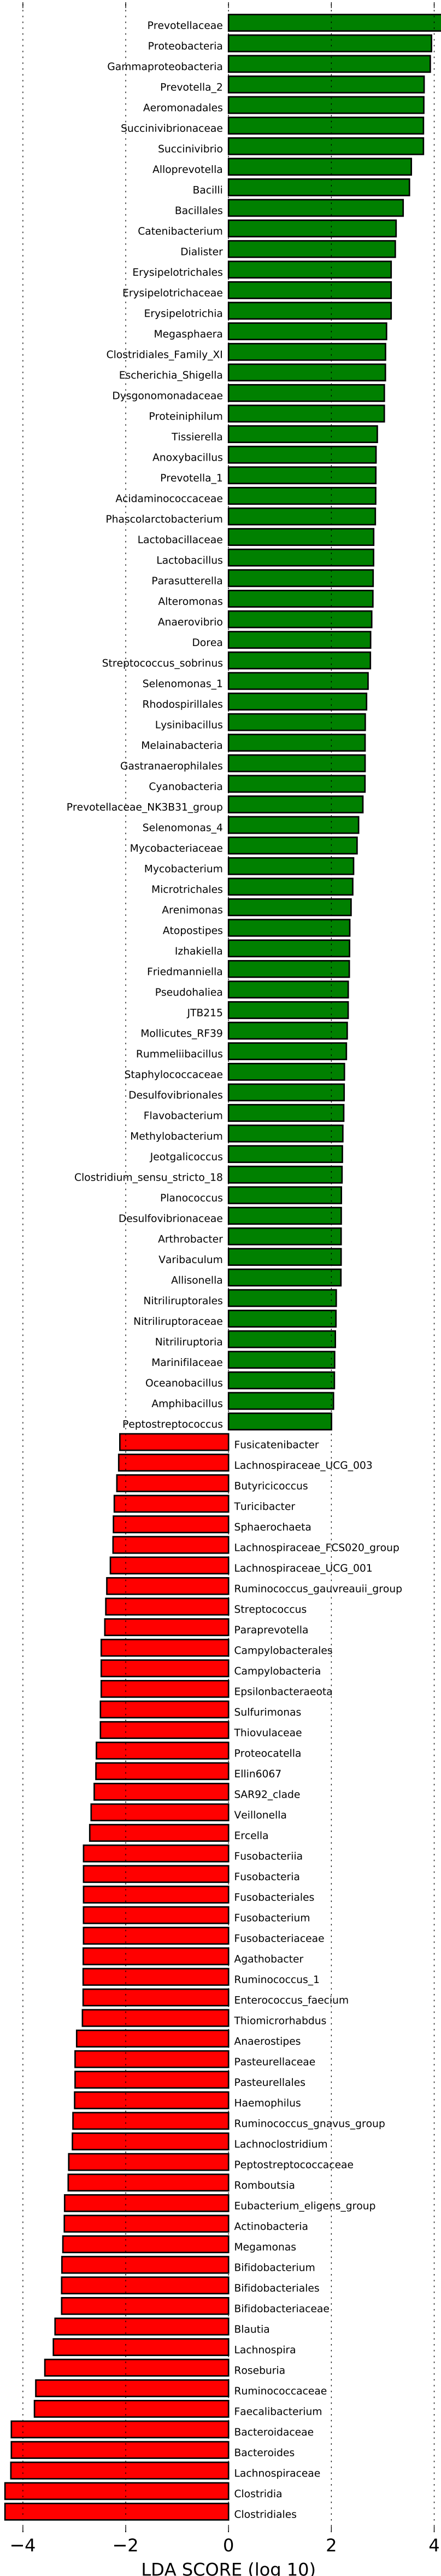

Bai Han

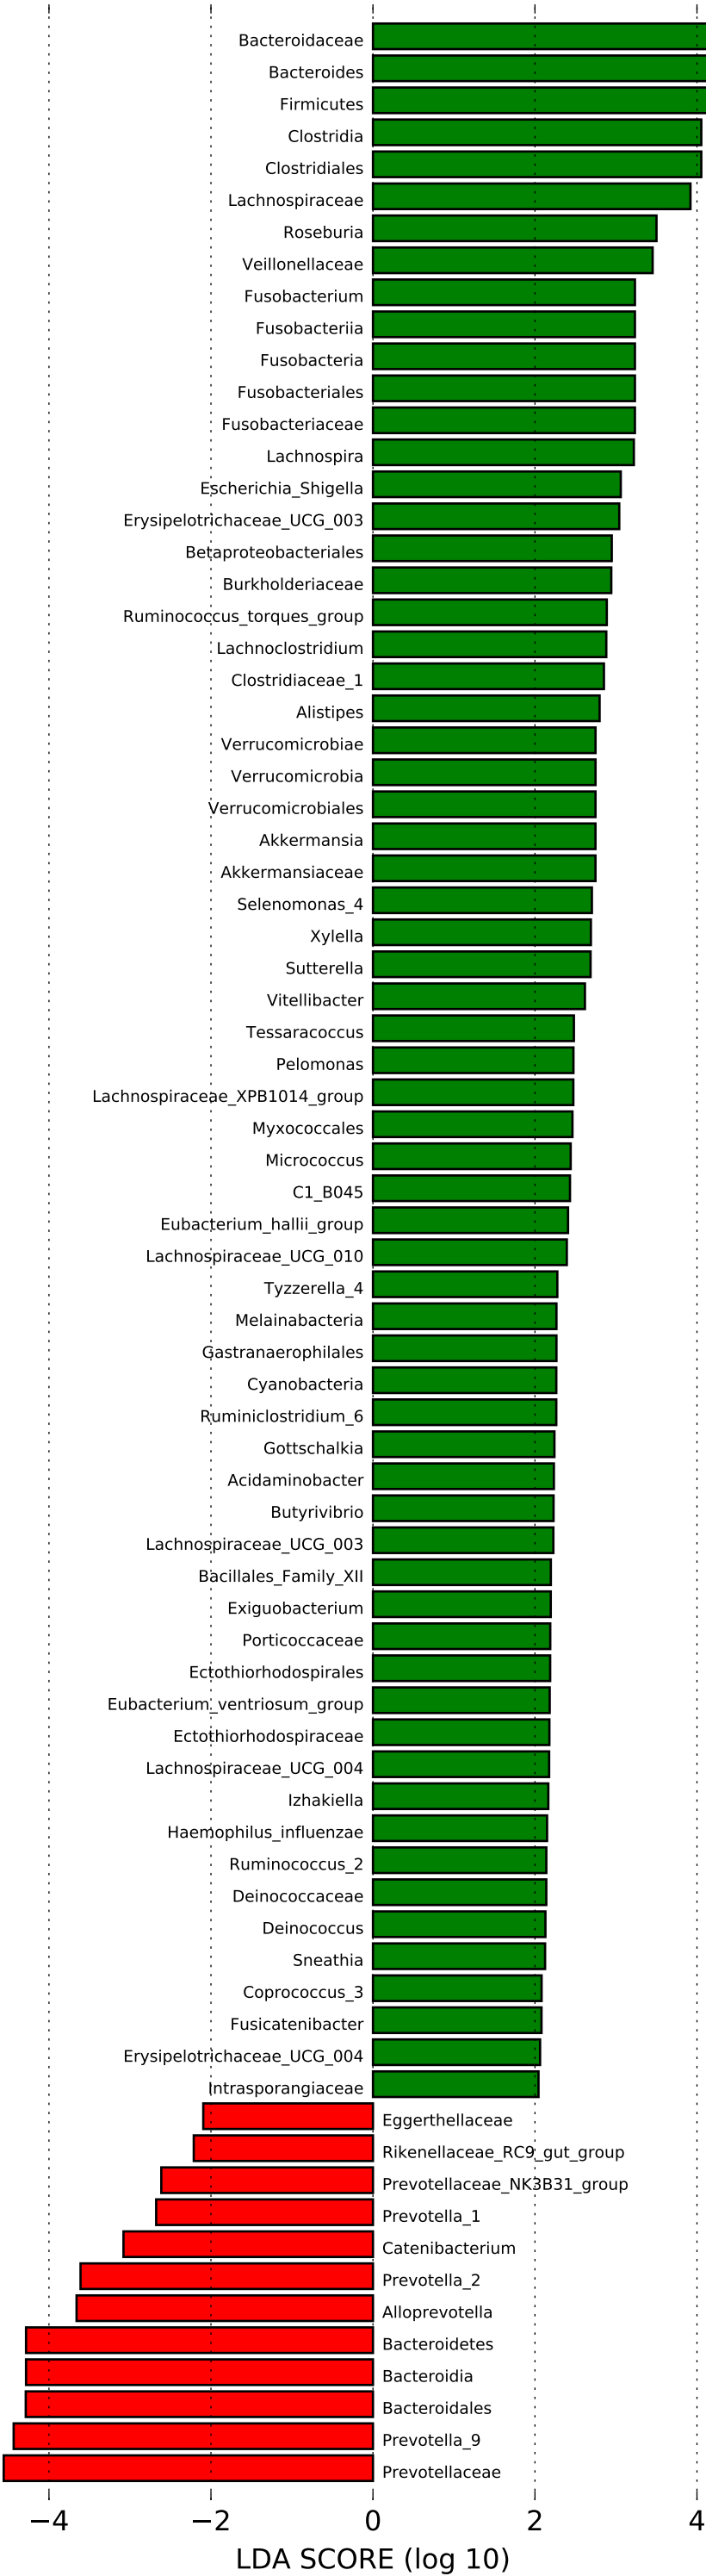

LDA SCORE (log 10)



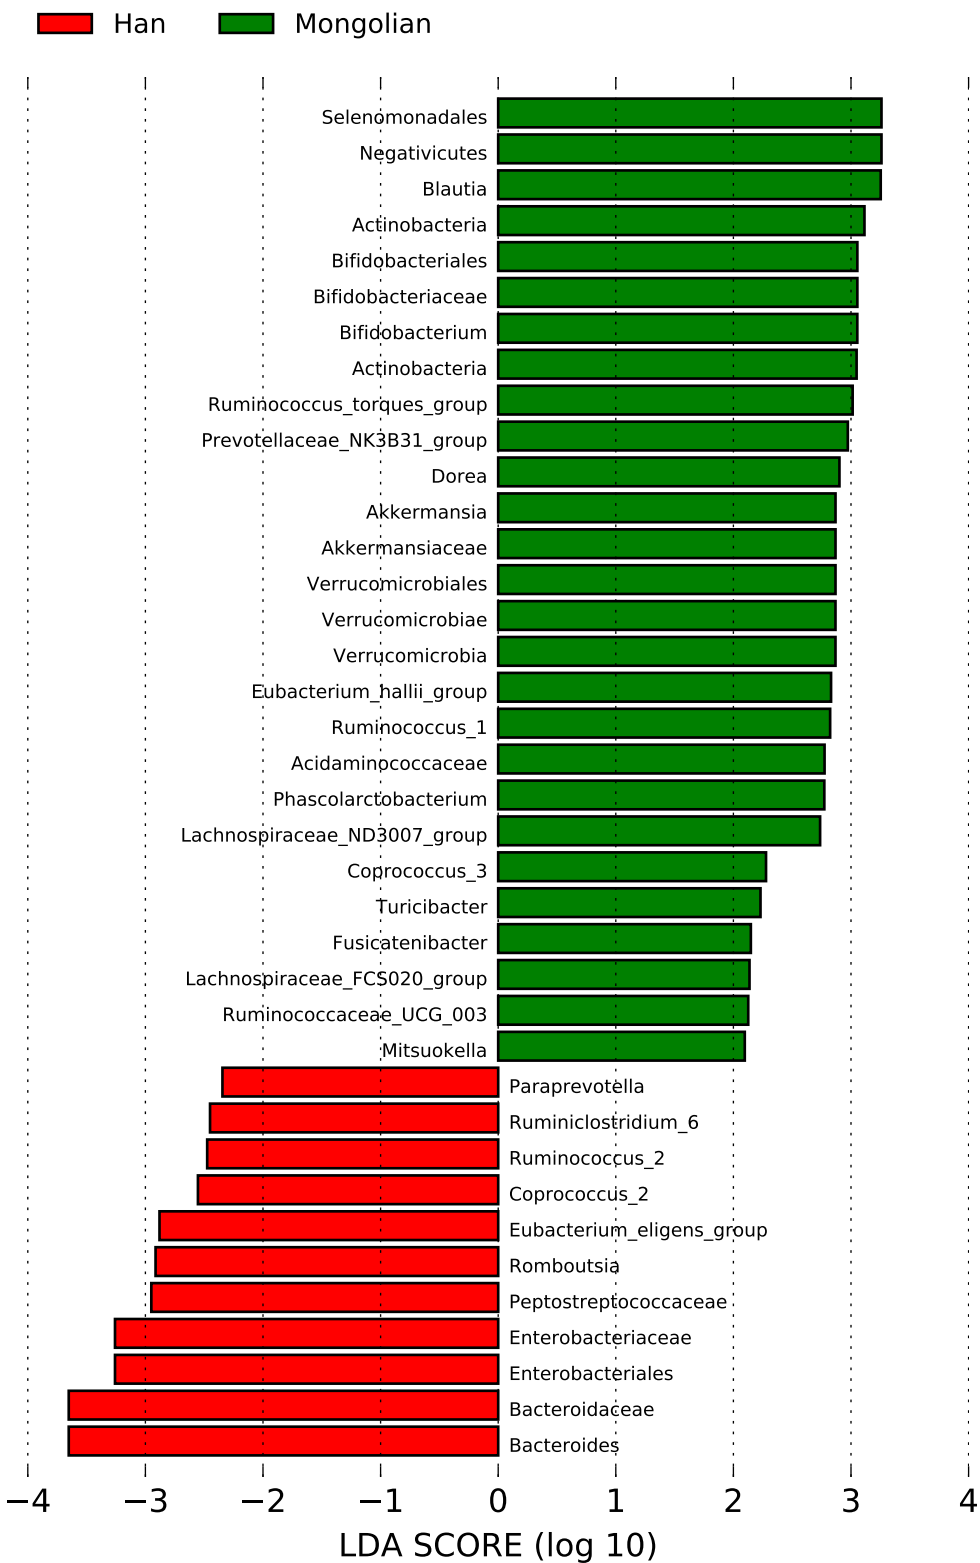

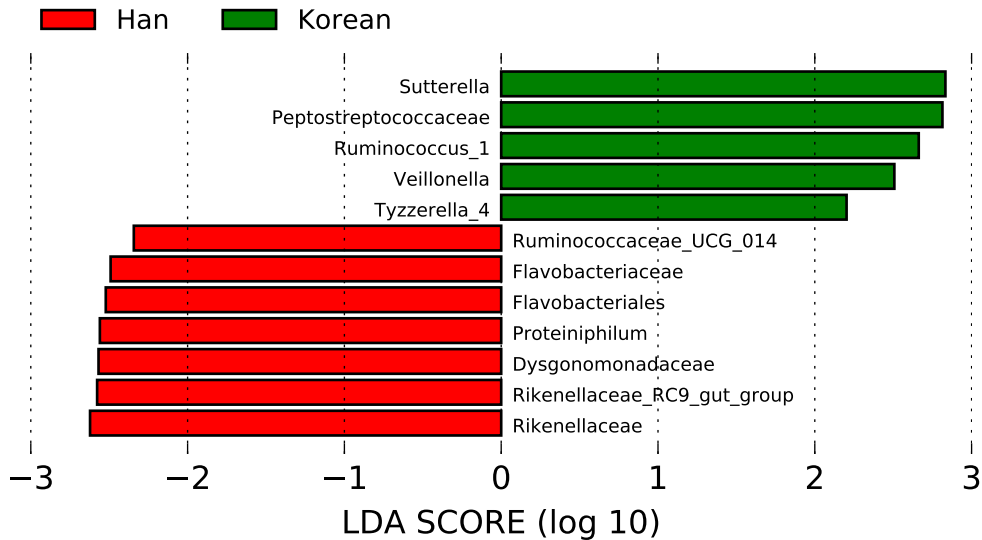

Supplement: s1 [file s1]
