# Supplementary material for: The Core and Distinction of the Gut Microbiota in Chinese Populations across Geography and Ethnicity
Source: MDPI journal article supplement (doi:10.3390/microorganisms8101579), 2020-10-14

A

Venn diagram of Core OTUs

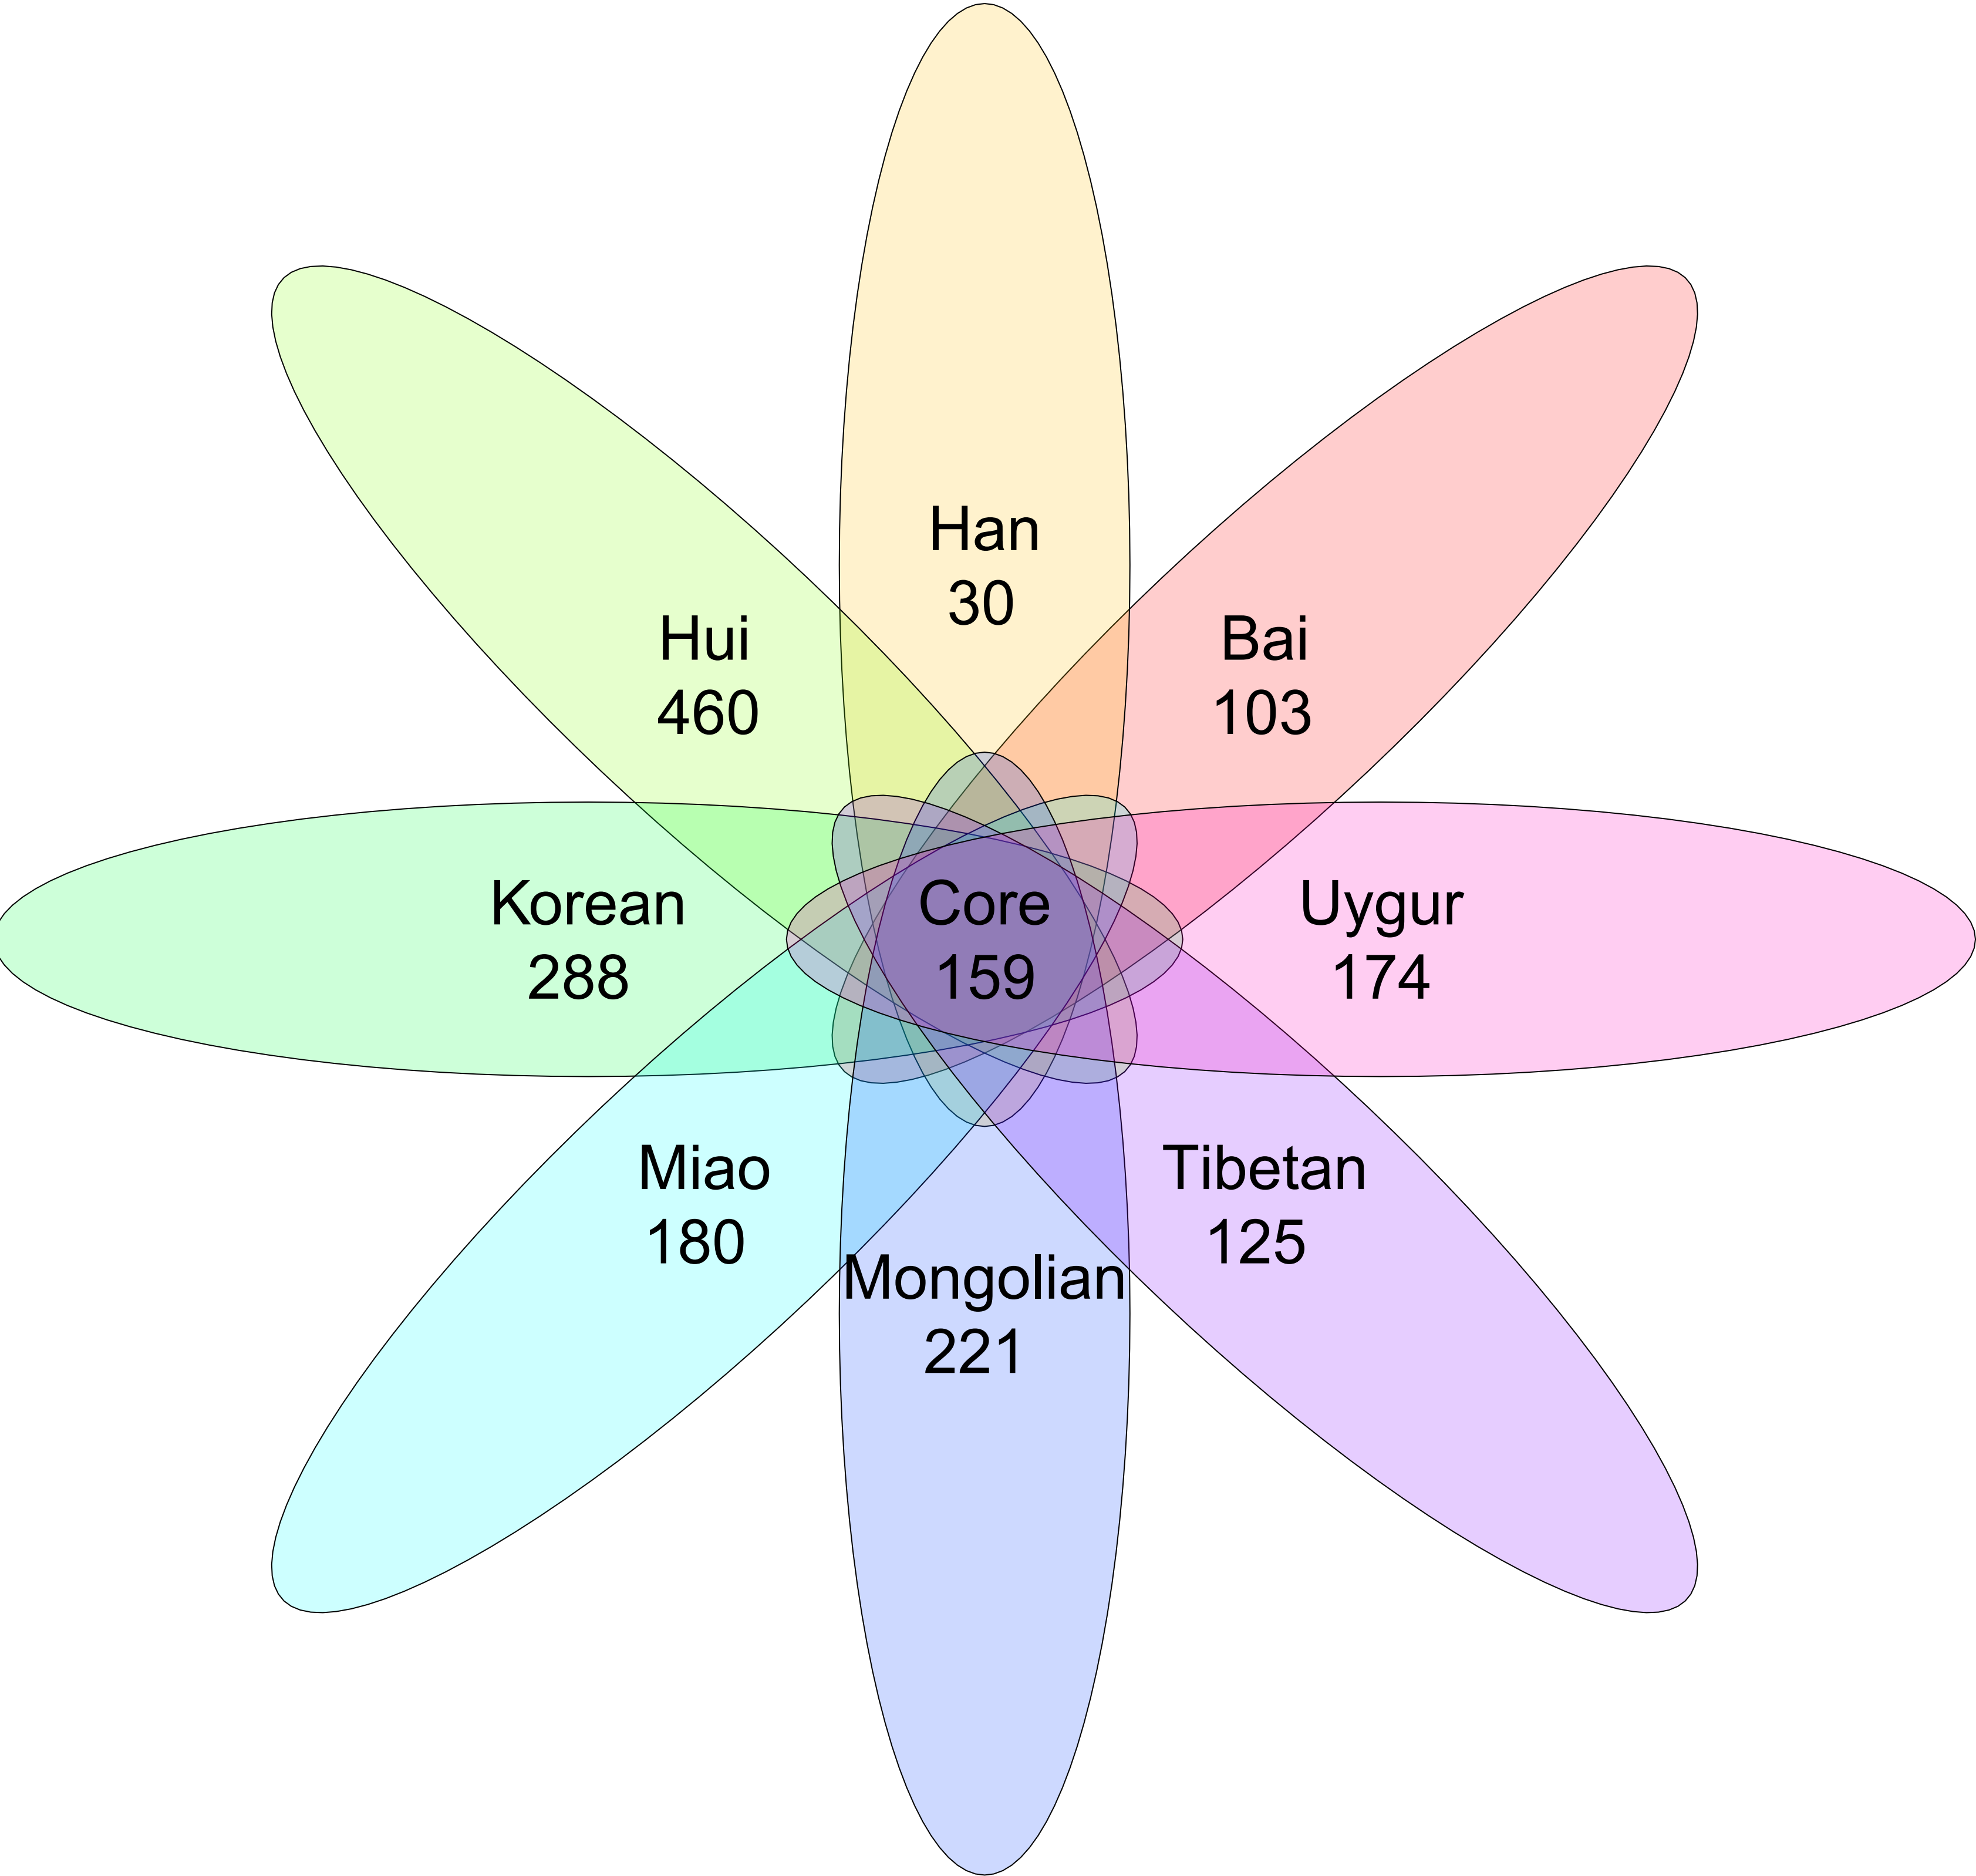

B

Venn diagram of Core genera

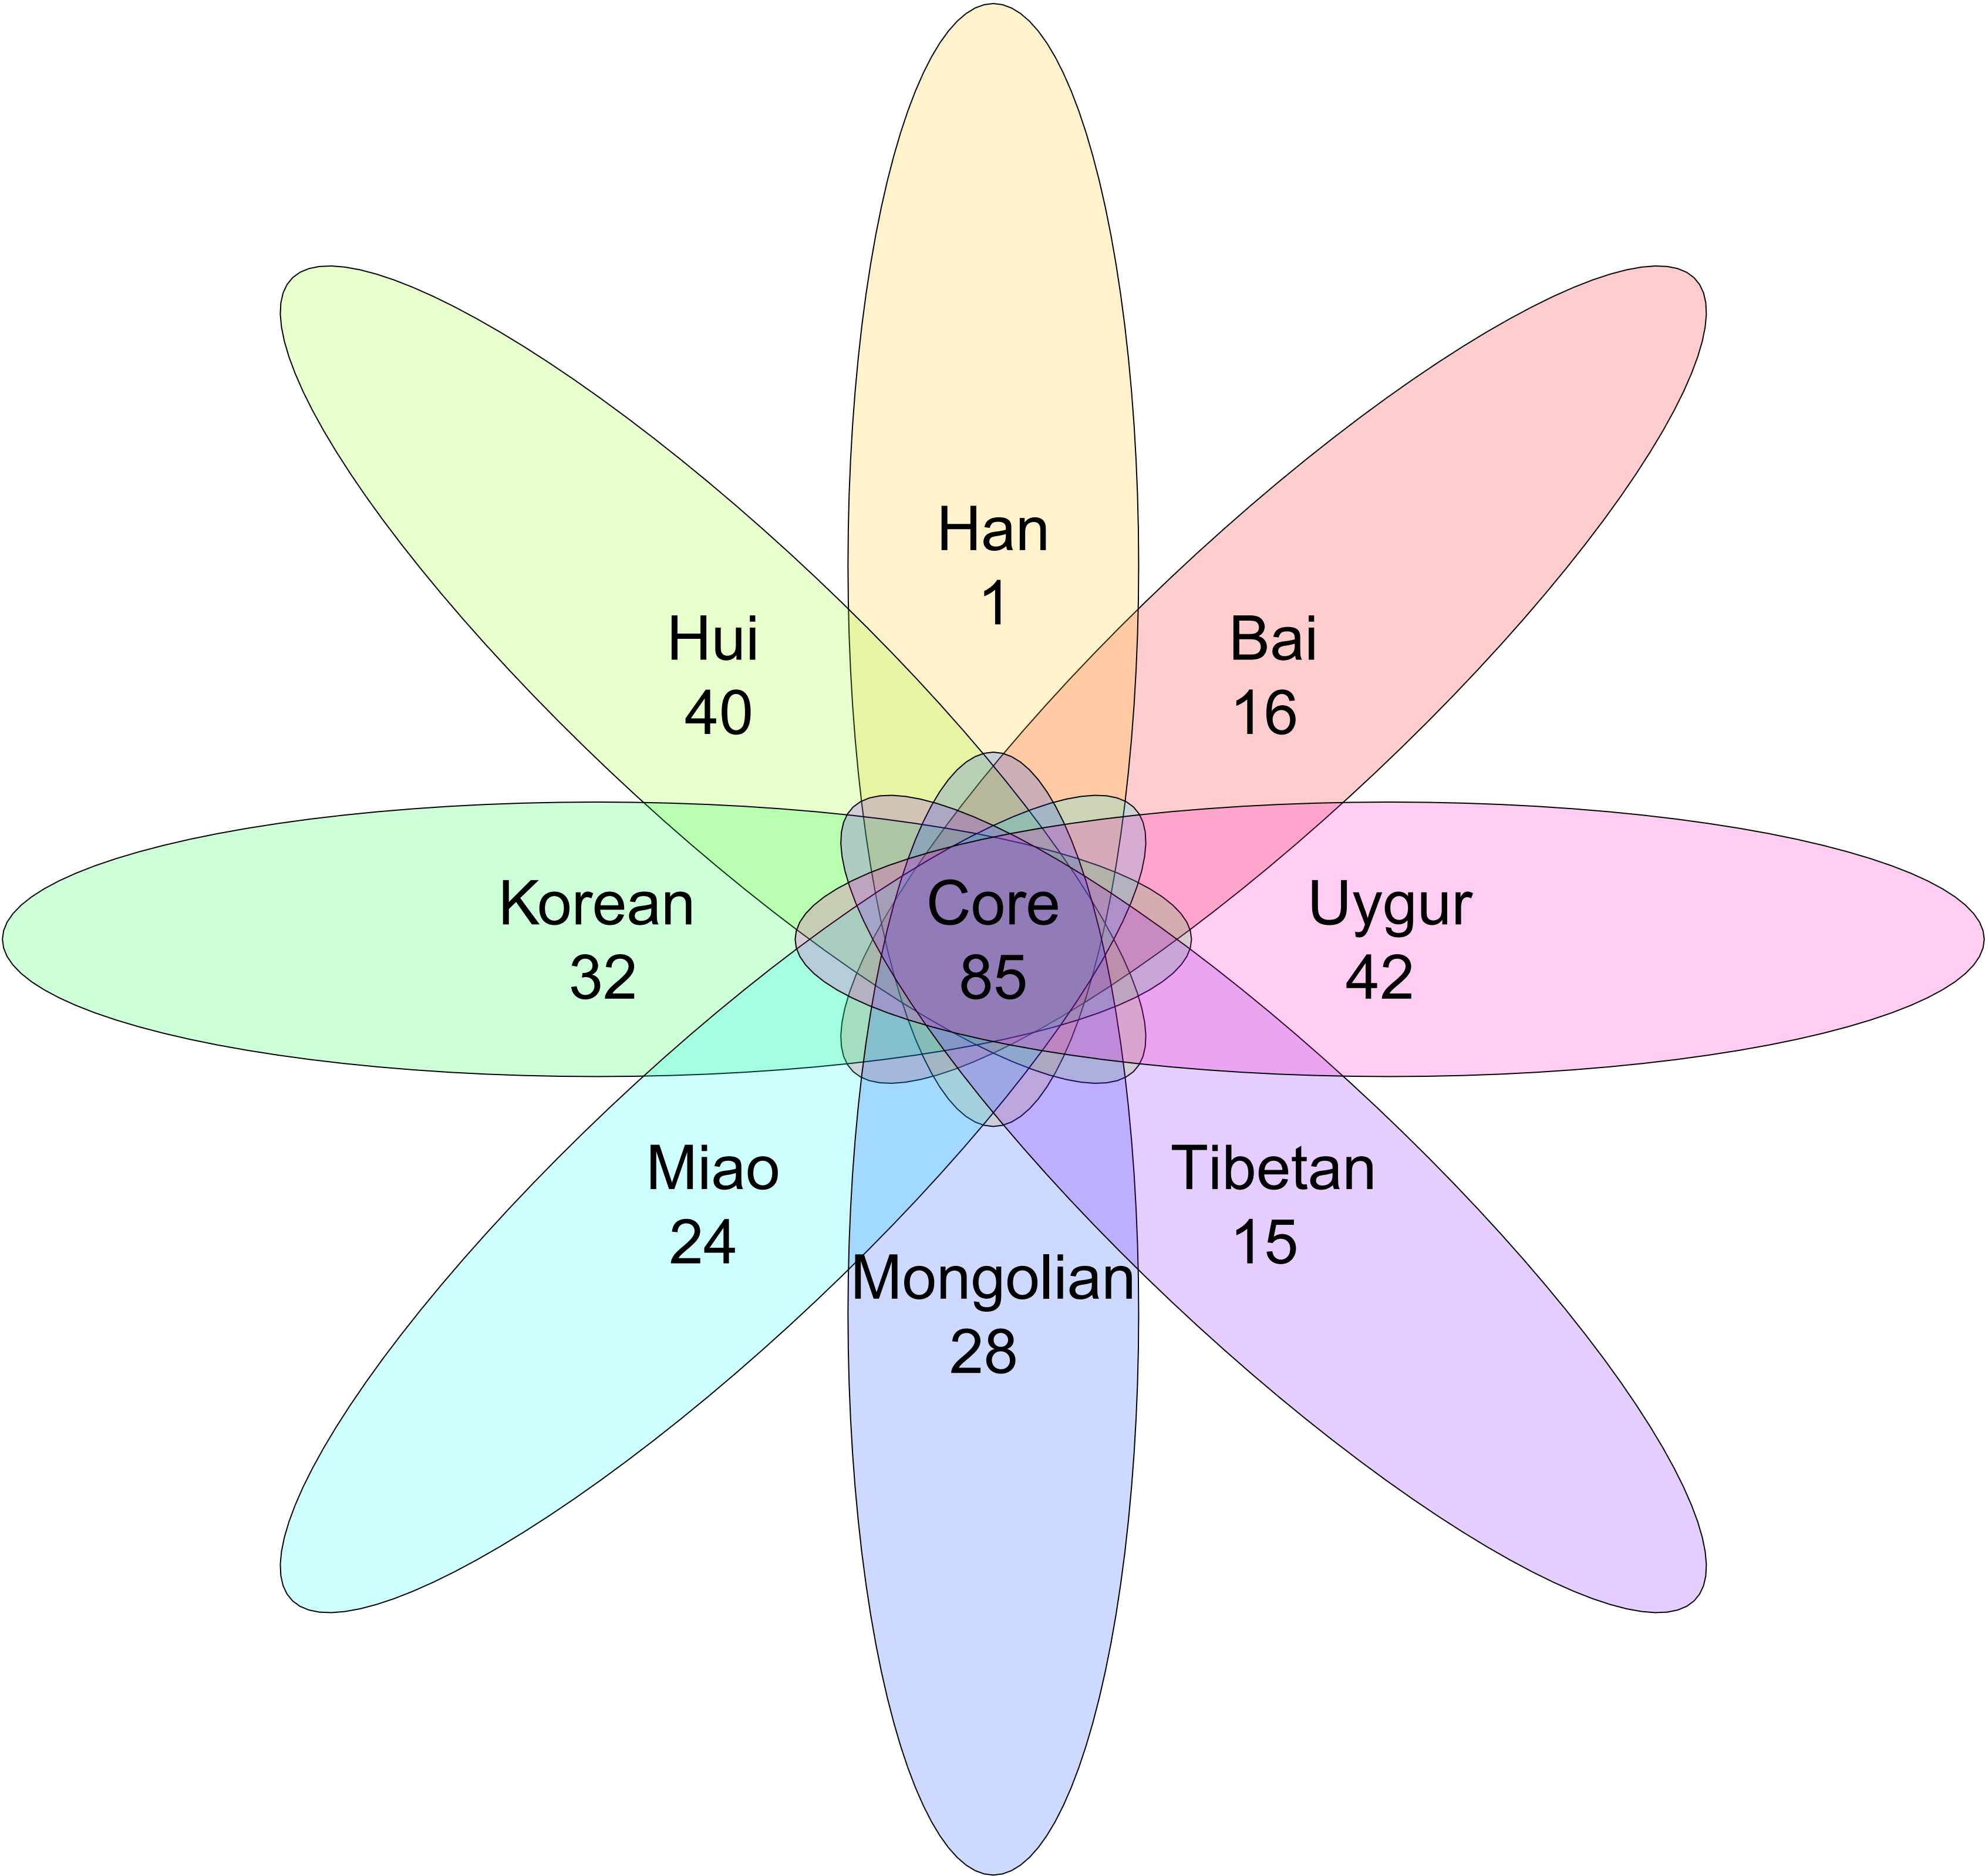

C

Venn diagram of different divisions in genera

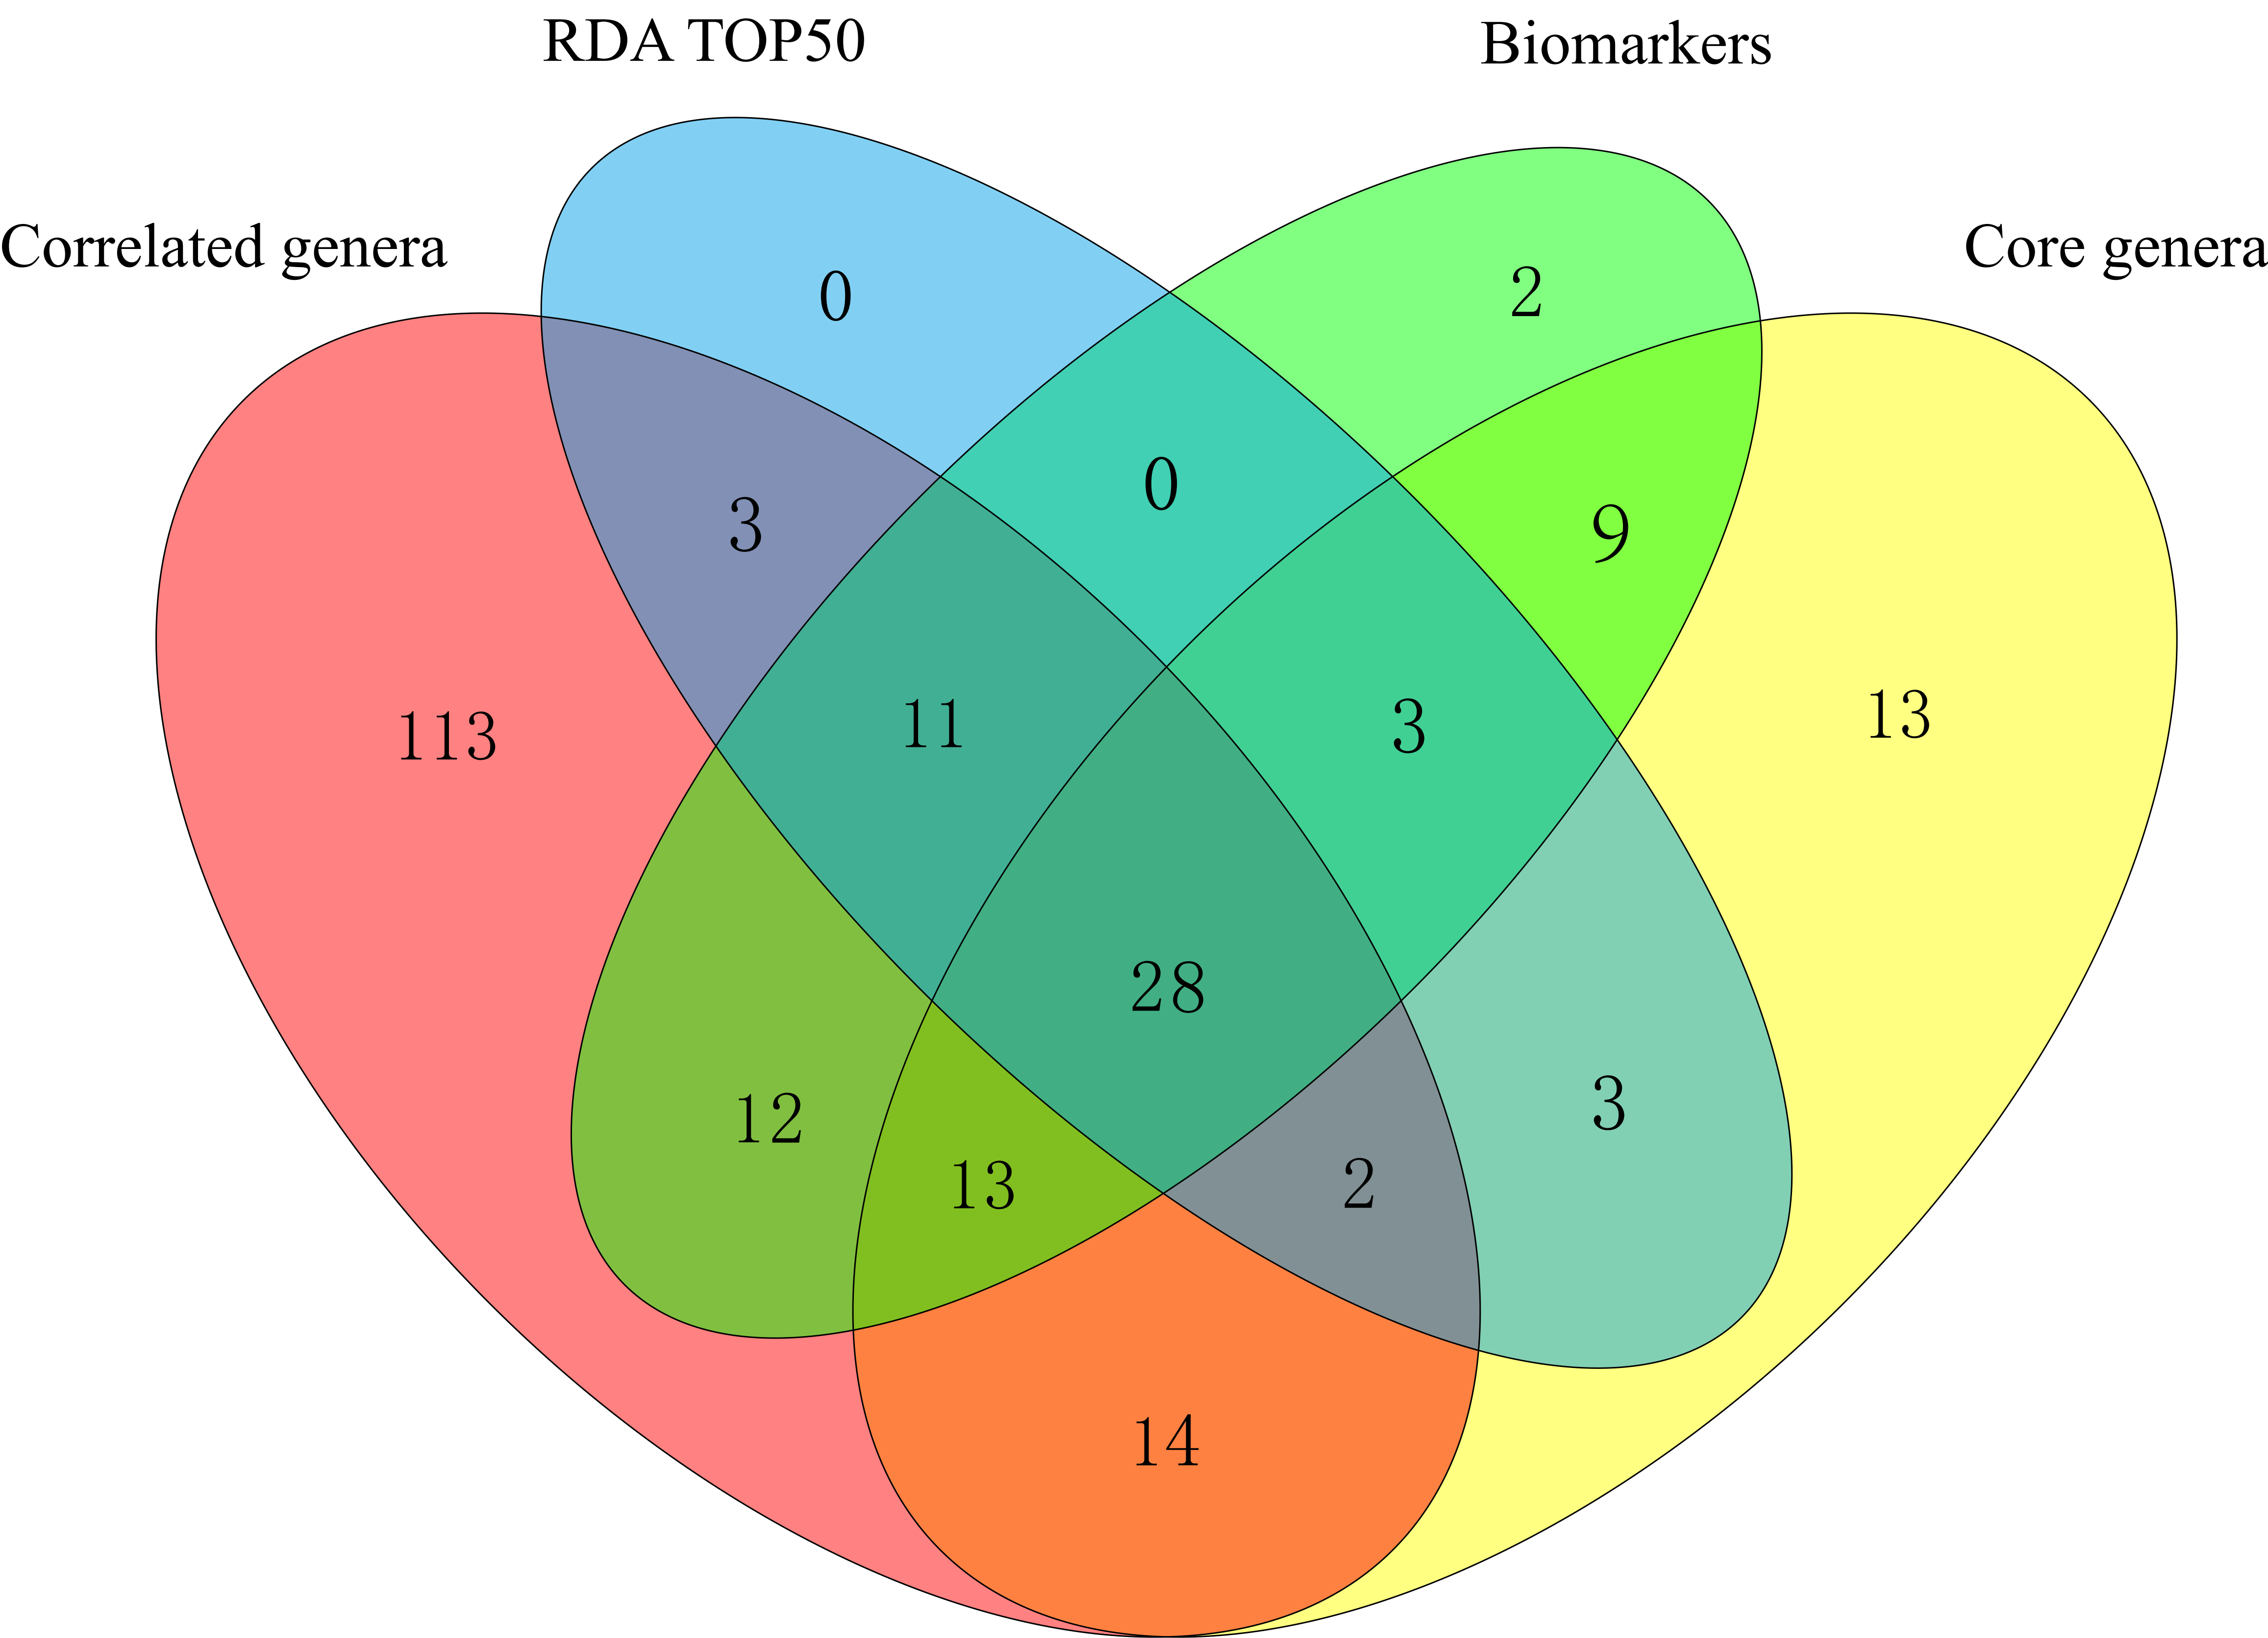

Supplement: s1 [file s1]
