# Supplementary material for: The Core and Distinction of the Gut Microbiota in Chinese Populations across Geography and Ethnicity
Source: MDPI journal article supplement (doi:10.3390/microorganisms8101579), 2020-10-14

Fig.S3 Pvalue of of all bacterium at each taxonomic level and KOs between geographic location and ethnicity by two-ways ANOCOV ; According to Tablle S4, Y-axis : Pvalue of geography (p1); X-axis : Pvalue of ethnicity (p2); Pvalue of comparison in geography (p3); Pvalue of comparison in ethnicity (p4) .●: p3 < 0.05 and p4 < 0.05; ▲: p3 ≥ 0.05 and p4 < 0.05; \* : p3 < 0.05 and p4 ≥ 0.05; ⊗ : p3 ≥ 0.05 and p4 ≥ 0.05.

# Pvalue of two-factor covariance in Core\_OTUs

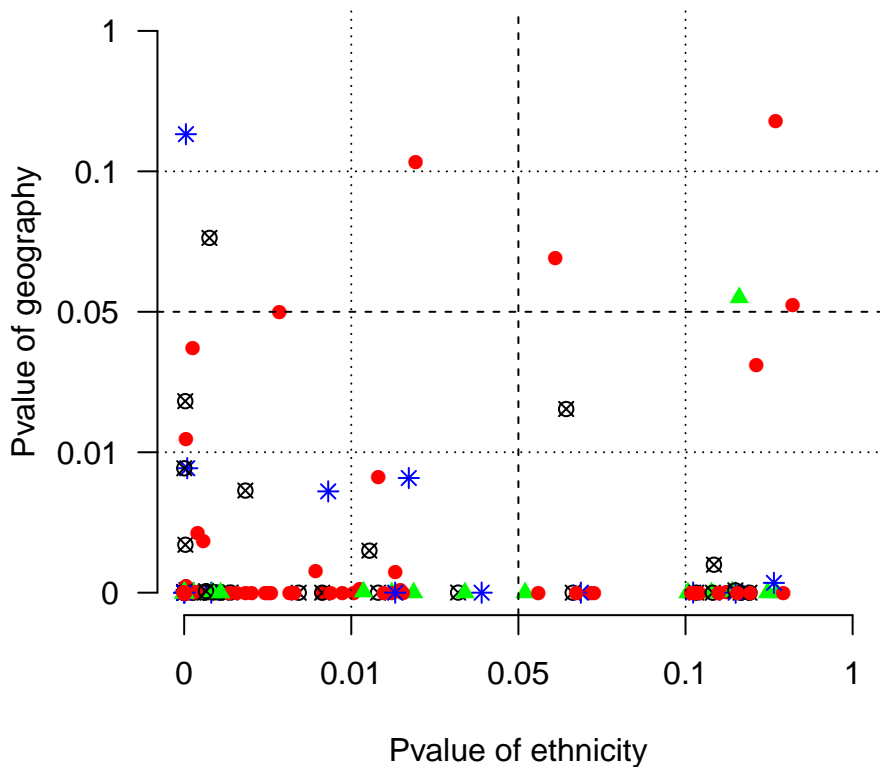

# Pvalue of two-factor covariance in Core\_genera

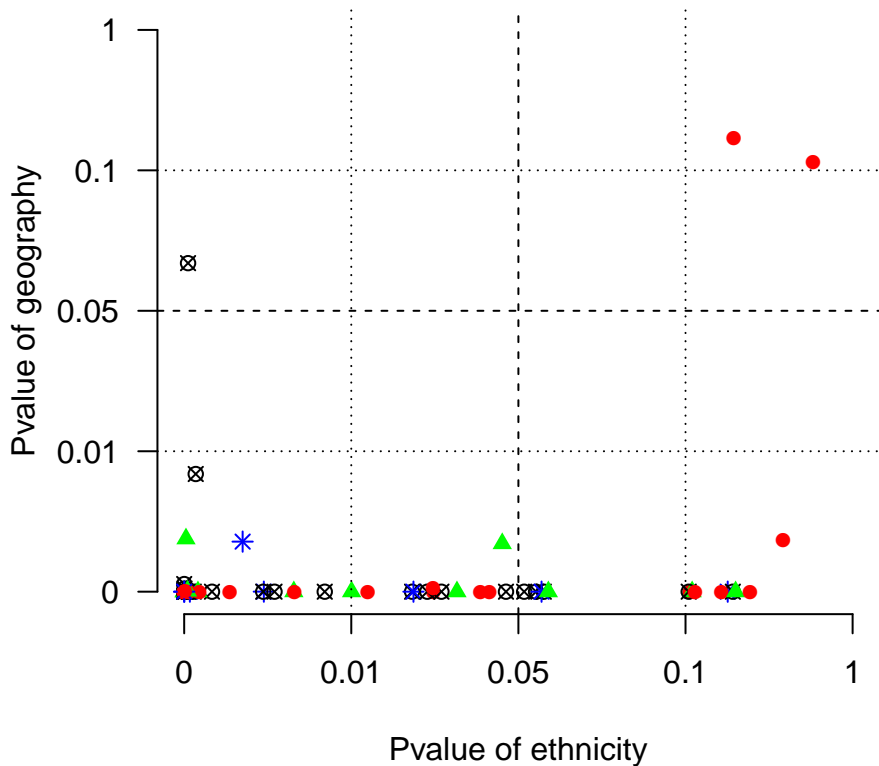

# Pvalue of two-factor covariance in genera

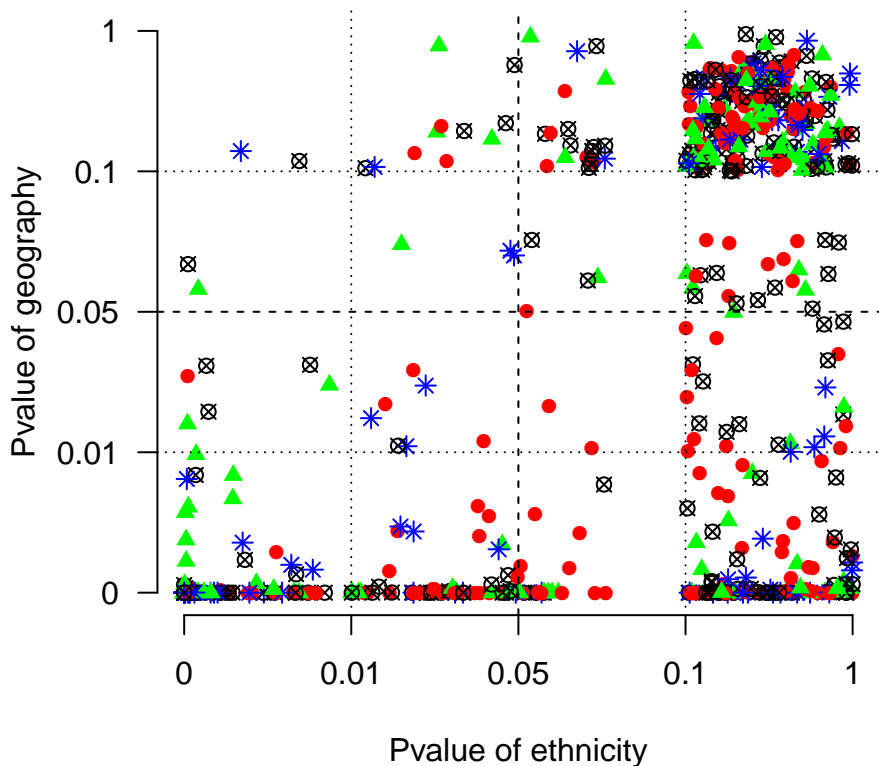

# Pvalue of two-factor covariance in families

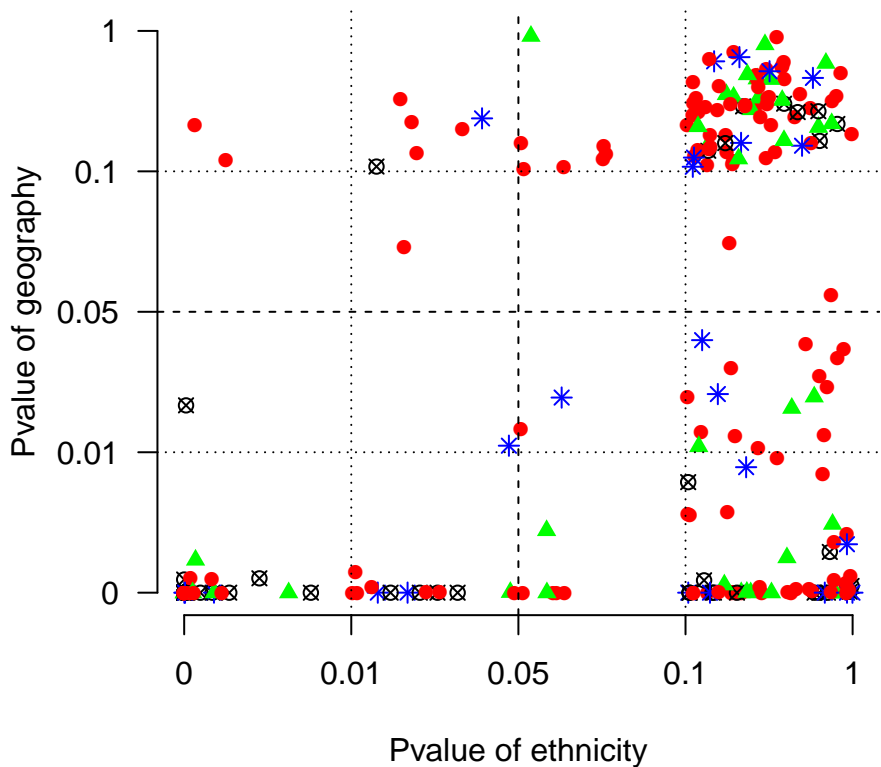

## Pvalue of two-factor covariance in orders

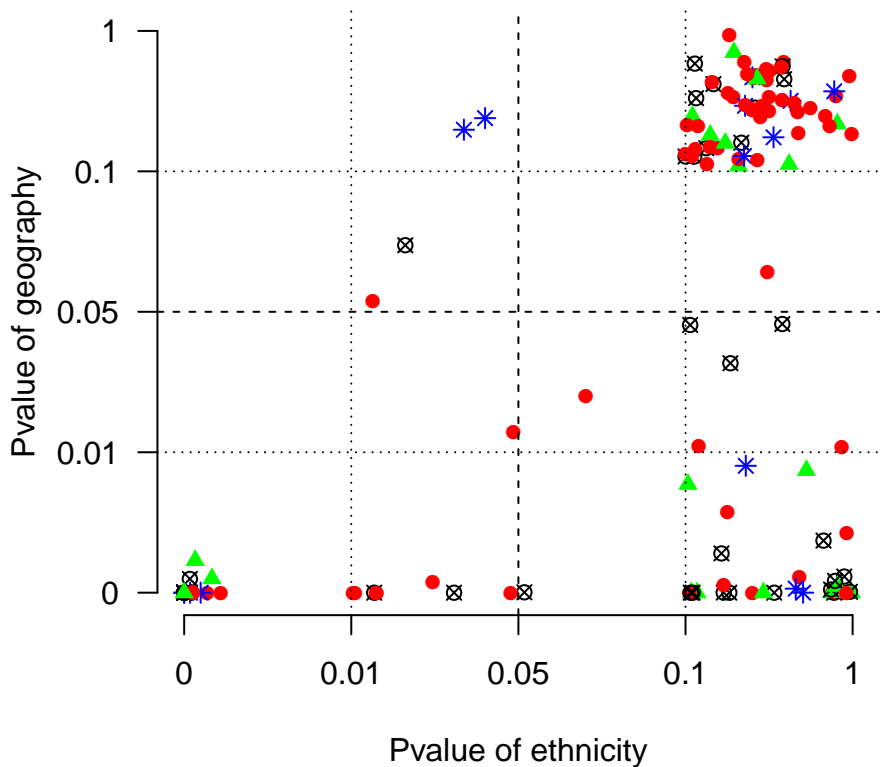

## Pvalue of two-factor covariance in classes

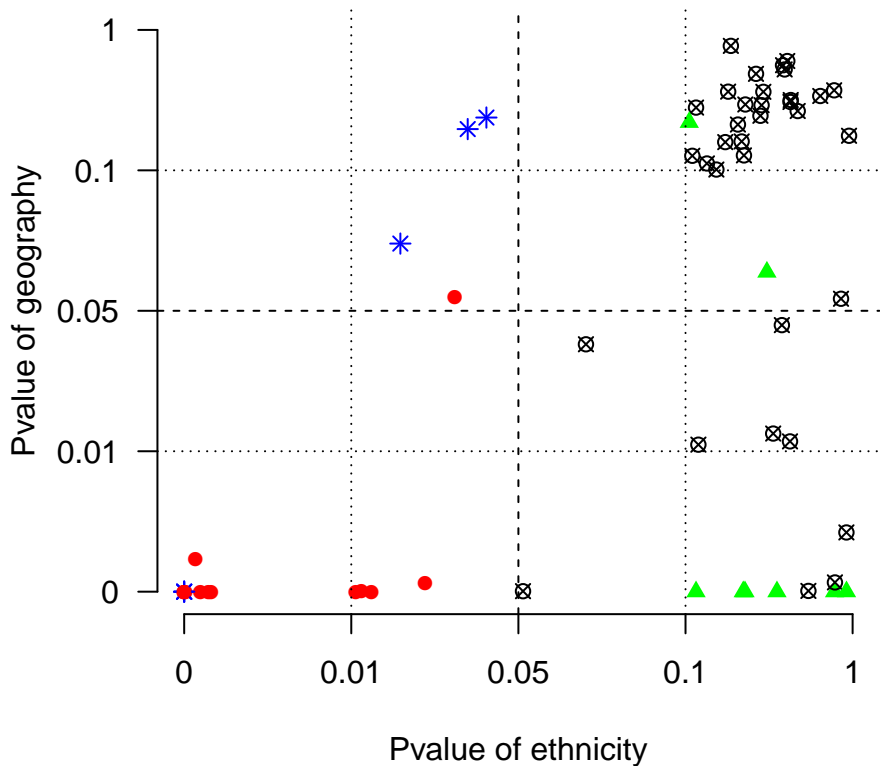

## Pvalue of two-factor covariance in phyla

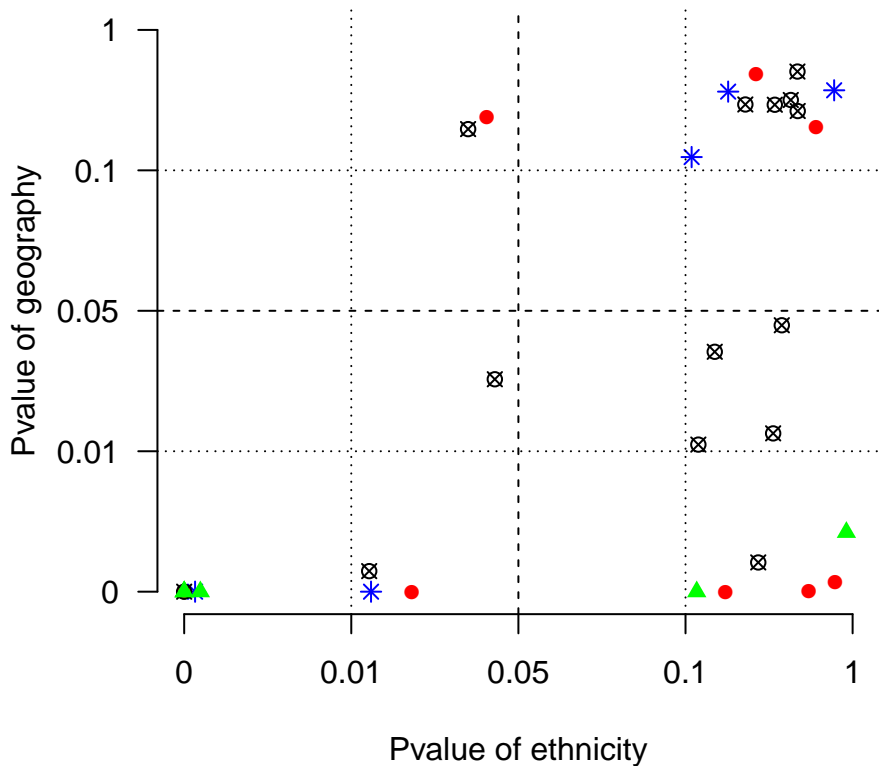



## Pvalue of two-factor covariance in KOs

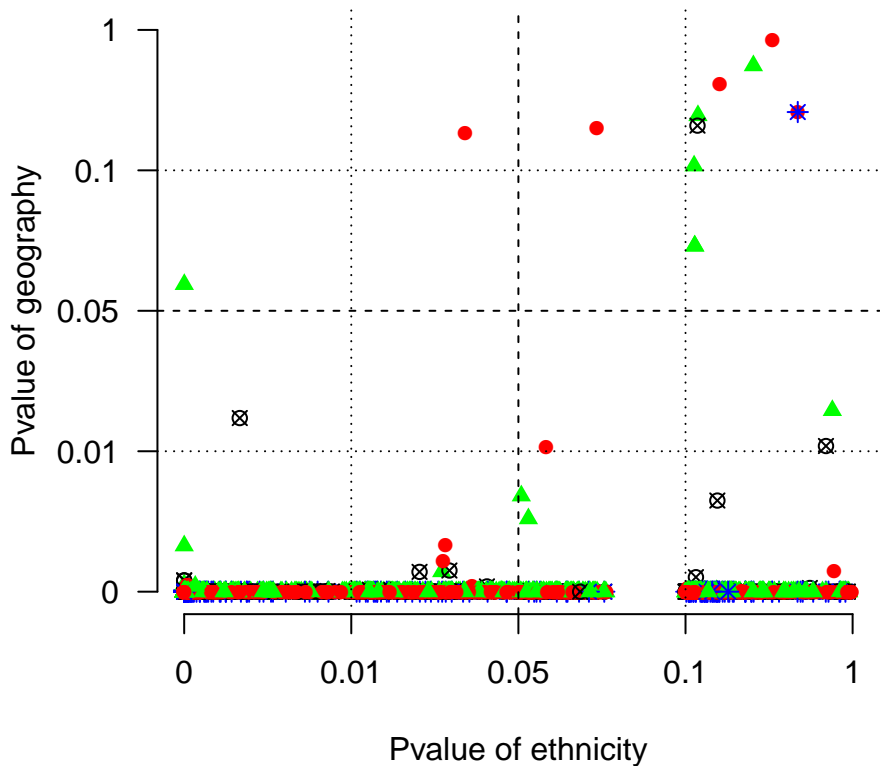

Supplement: s1 [file s1]
