# Supplementary material for: The Core and Distinction of the Gut Microbiota in Chinese Populations across Geography and Ethnicity
Source: MDPI journal article supplement (doi:10.3390/microorganisms8101579), 2020-10-14
Supplement: s1 [file s1]

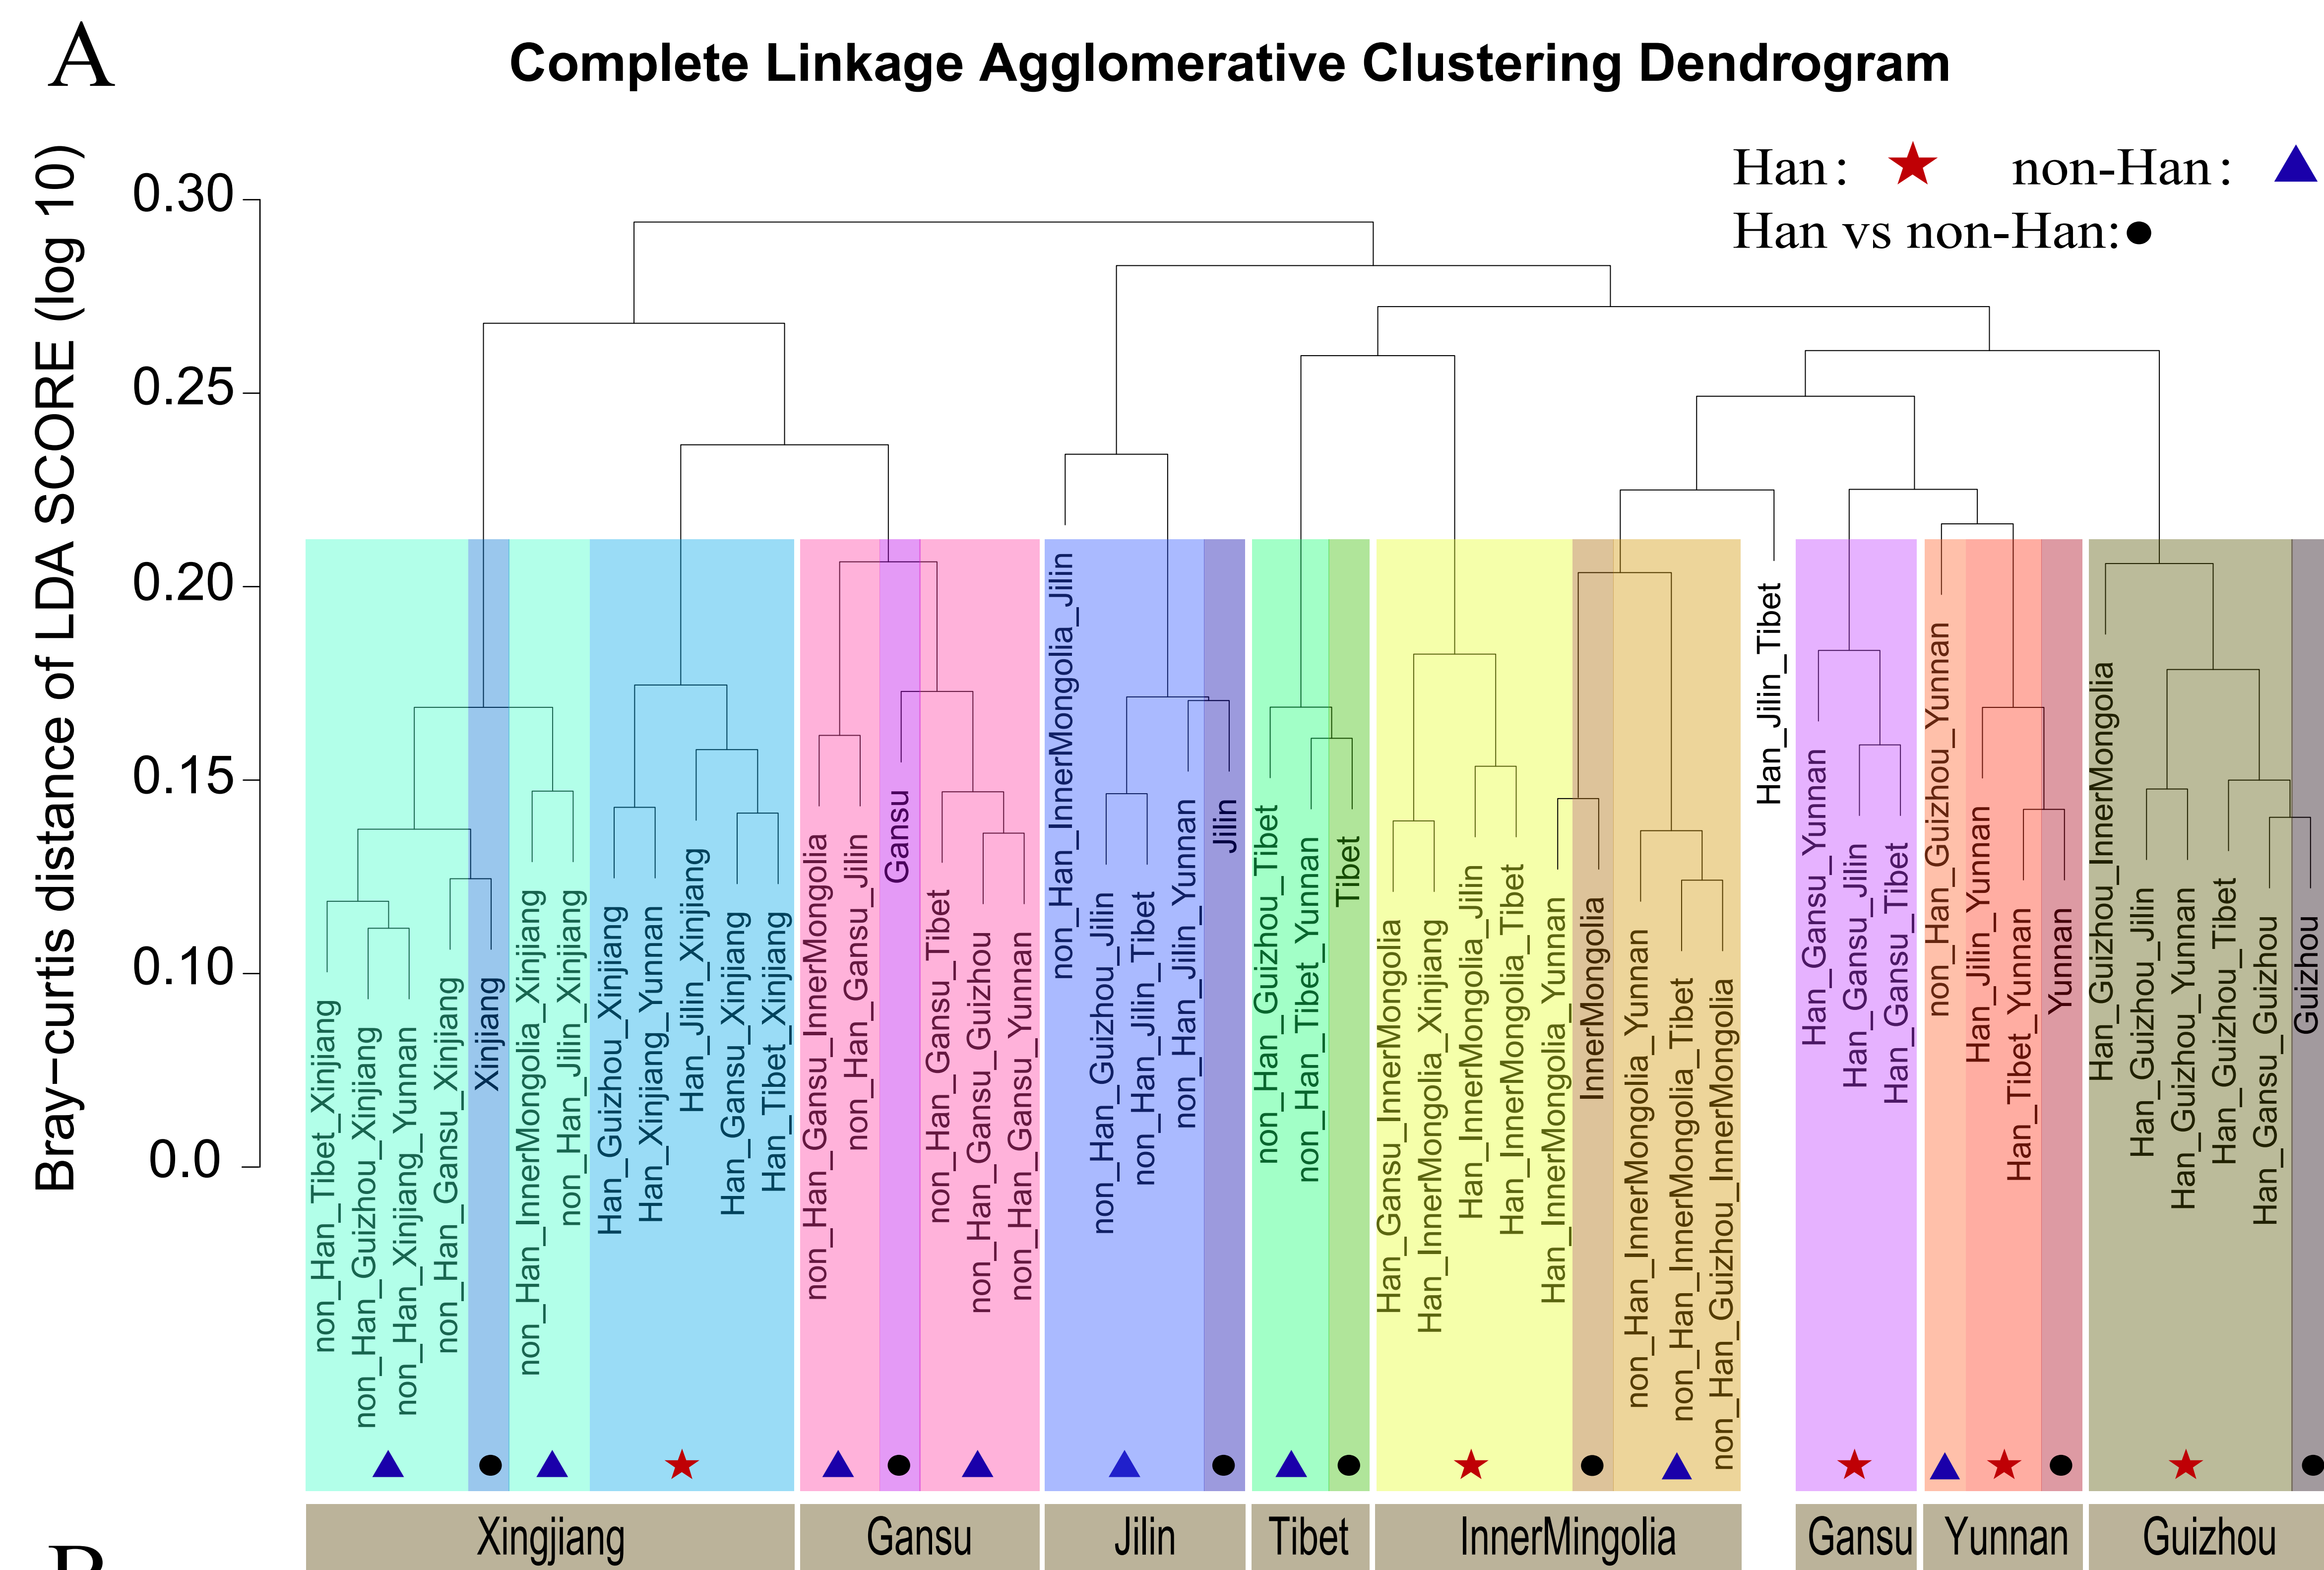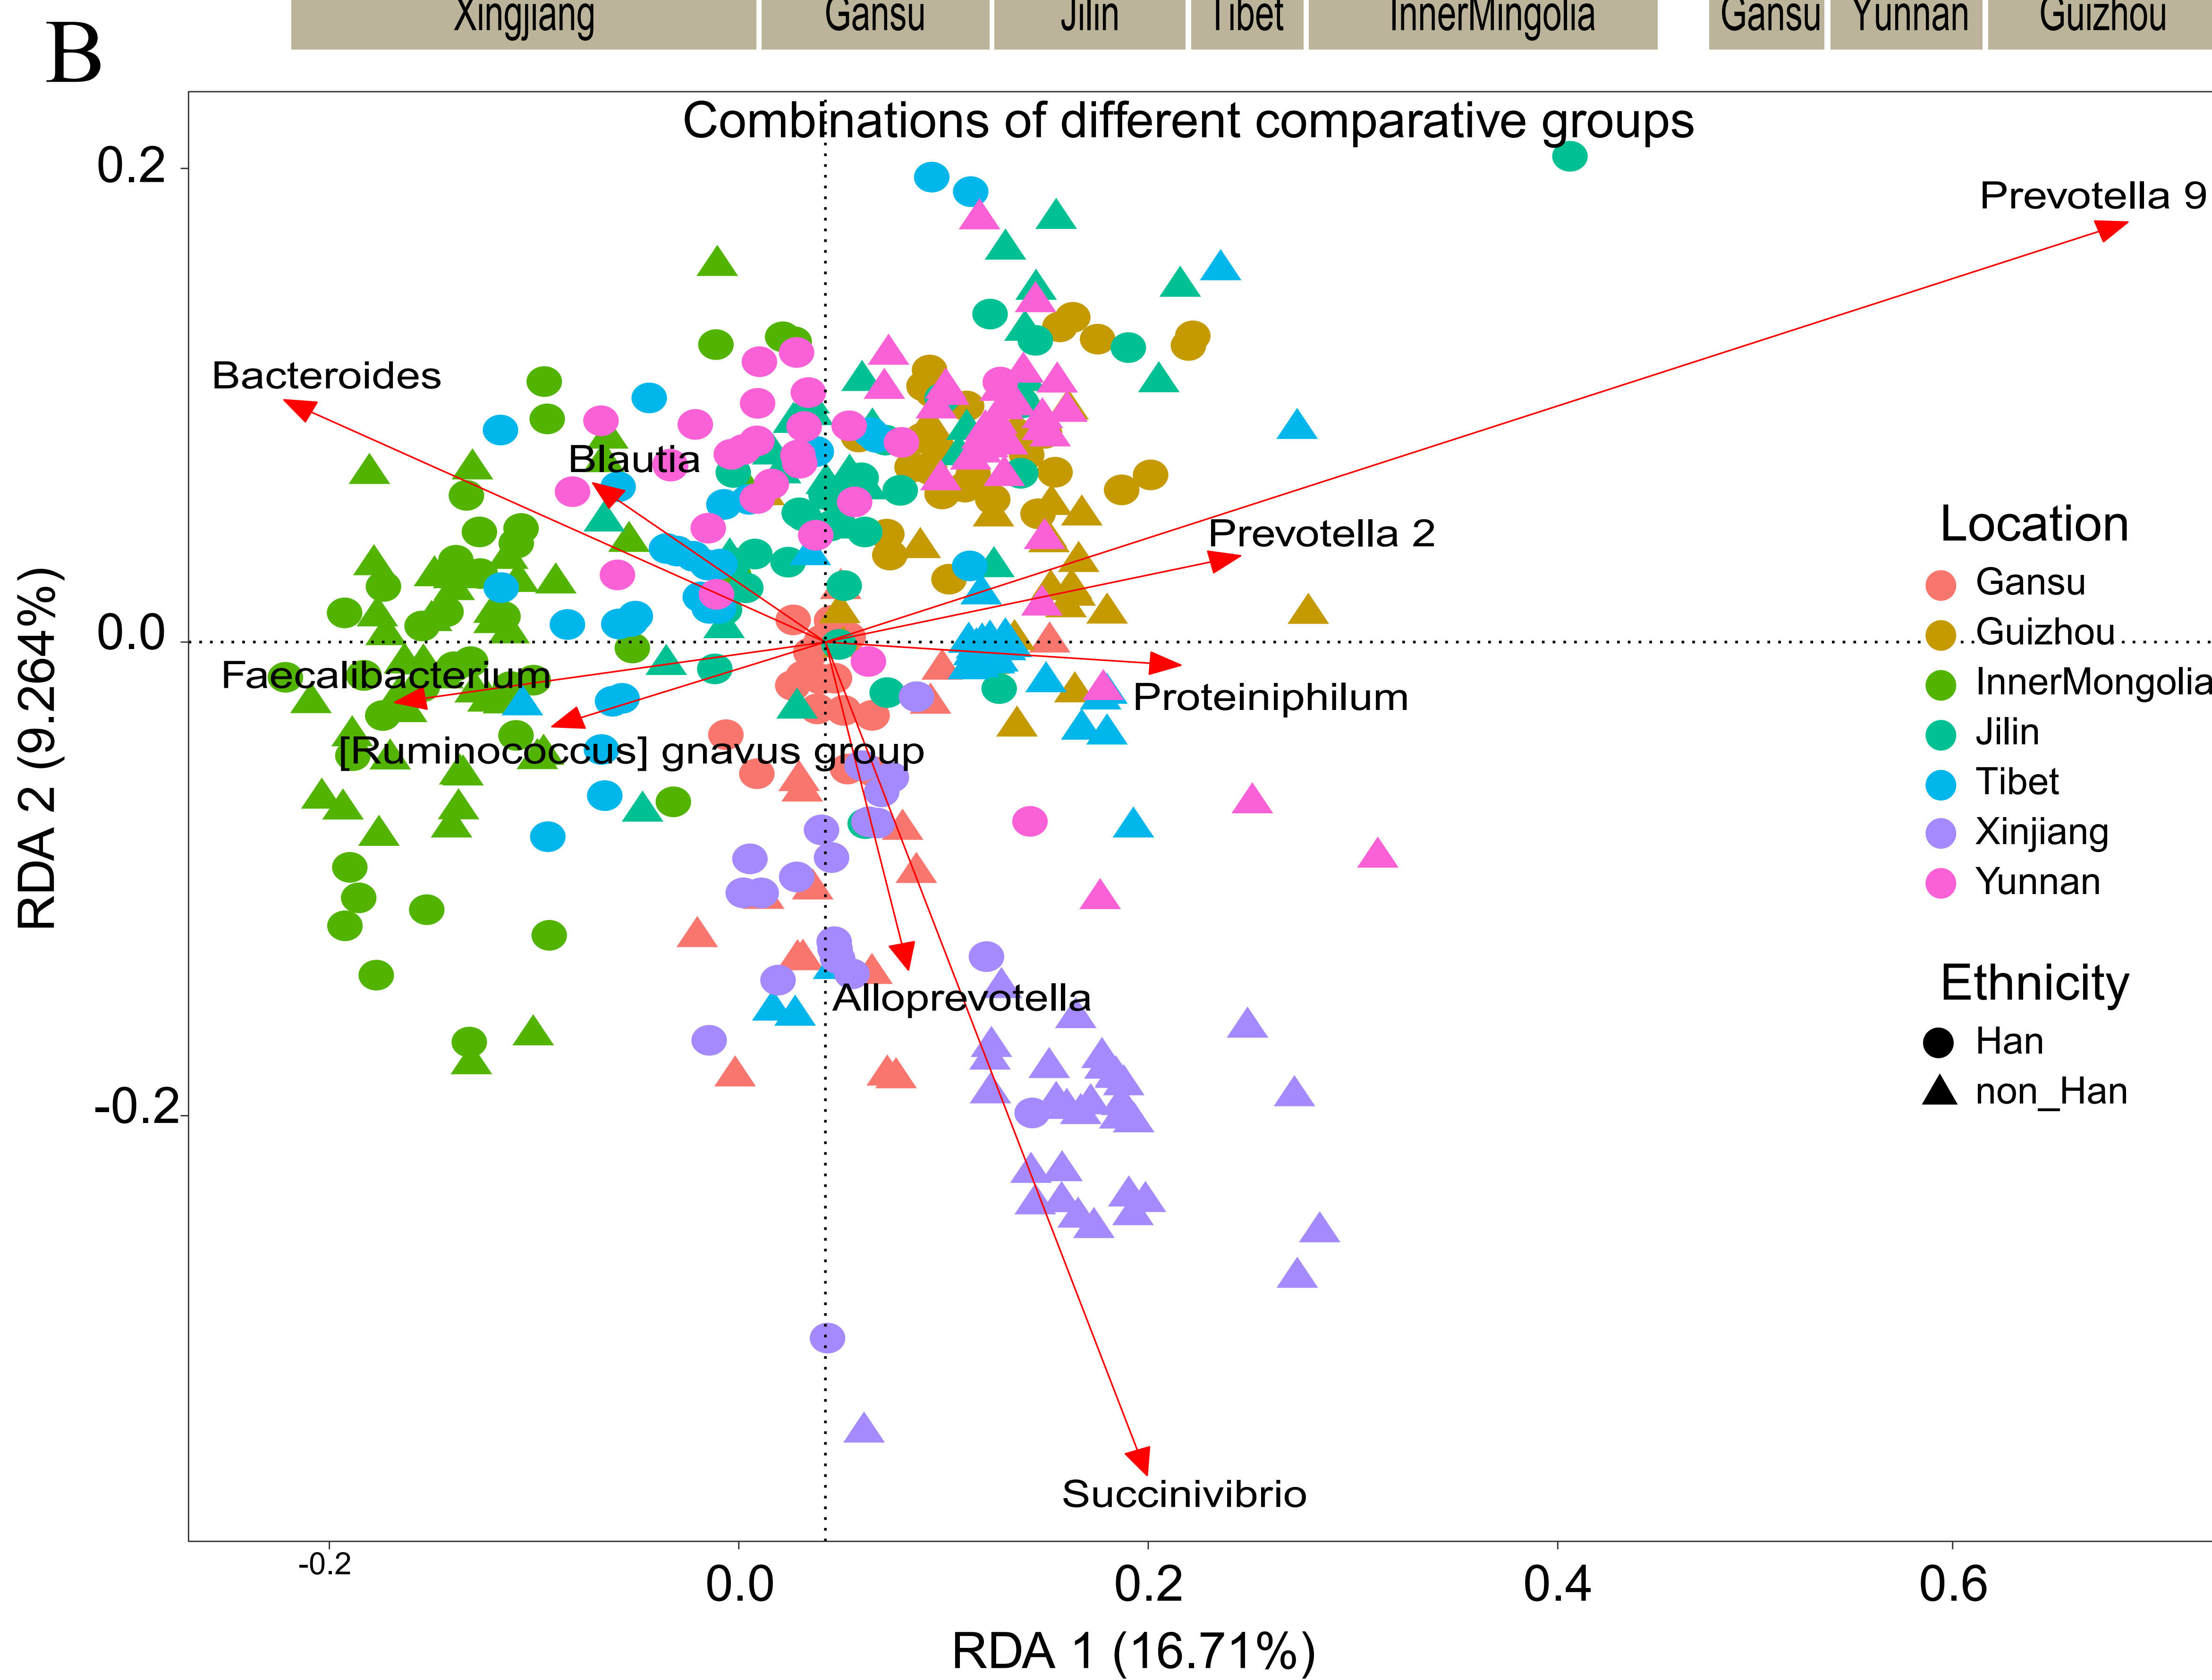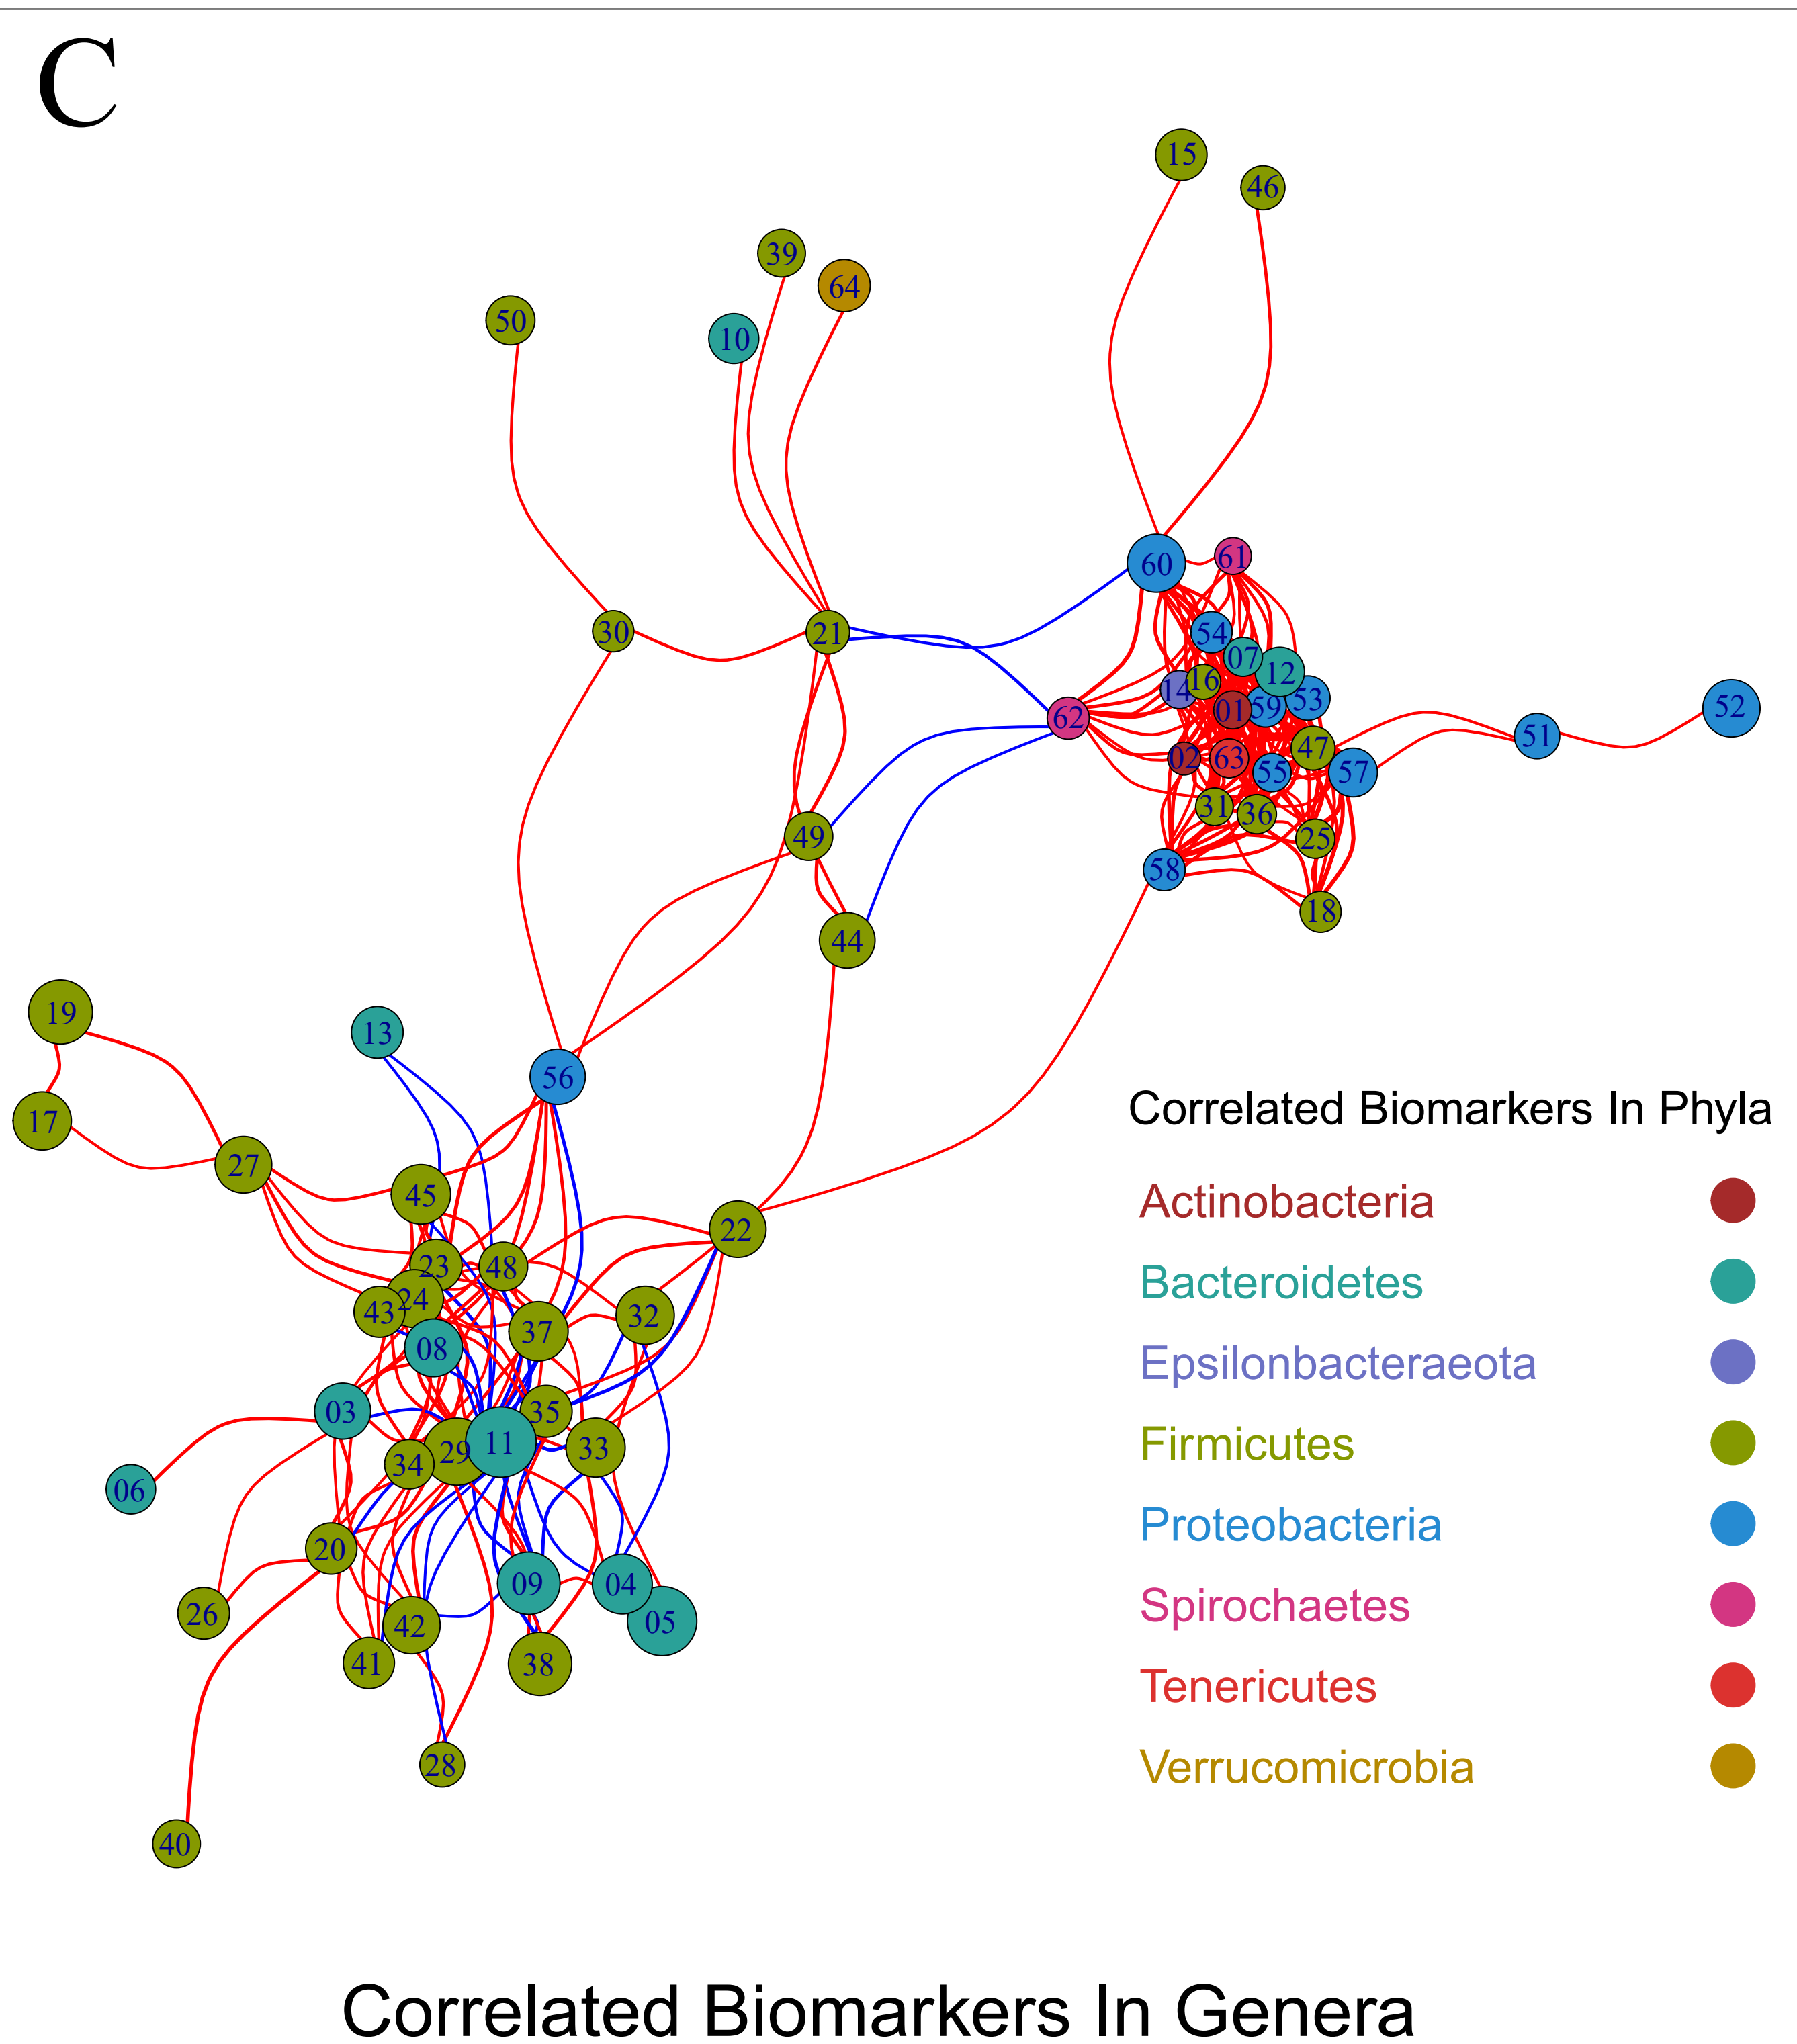

01. *Corynebacterium\_1*  
02. *Glutamicibacter*  
03. *Alistipes*  
04. *Alloprevotella*  
05. *Bacteroides*  
06. *Barnesiella*  
07. *Flavobacterium*  
08. *Parabacteroides*  
09. *Prevotella\_2*  
10. *Prevotella\_7*  
11. *Prevotella\_9*  
12. *Proteiniphilum*  
13. *Rikenellaceae\_RC9\_gut\_group*  
14. *Sulfurimonas*  
15. *Agathobacter*  
16. *Amphibacillus*  
17. *Anaerostipes*  
18. *Atopostipes*  
19. *Blautia*  
20. *Christensenellaceae\_R\_7\_group*  
21. *Clostridium\_innocuum\_group*  
22. *Clostridium\_sensu\_stricto\_1*  
23. *Coprococcus\_3*  
24. *Dorea*  
25. *Erysipelothrix*  
26. *Eubacterium\_coprostanoligenes\_group*  
27. *Eubacterium\_hallii\_group*  
28. *Eubacterium\_xylanophilum\_group*  
29. *Faecalibacterium*  
30. *Hungatella*  
31. *Jeotgalicoccus*  
32. *Lachnoclostridium*  
33. *Lachnospira*  
34. *Lachnospiraceae\_FCS020\_group*  
35. *Lachnospiraceae\_UCG\_004*  
36. *Lysinibacillus*  
37. *Romboutsia*  
38. *Roseburia*  
39. *Ruminiclostridium\_6*  
40. *Ruminococcaceae\_NK4A214\_group*  
41. *Ruminococcaceae\_UCG\_014*  
42. *Ruminococcus\_1*  
43. *Ruminococcus\_gauvreauii\_group*  
44. *Ruminococcus\_gnavus\_group*  
45. *Ruminococcus\_torques\_group*  
46. *Selenomonas\_1*  
47. *Tissierella*  
48. *Turicibacter*  
49. *Tyzzereella\_4*  
50. *Veillonella*  
51. *Desulfovibrio*  
52. *Escherichia\_Shigella*  
53. *Ignatzschineria*  
54. *Marinomonas*  
55. *Oceanisphaera*  
56. *Parasutterella*  
57. *Pseudomonas*  
58. *Psychrobacter*  
59. *Shewanella*  
60. *Succinivibrio*  
61. *Sphaerochaeta*  
62. *Treponema\_2*  
63. *Acholeplasma*  
64. *Akkermansia*
