# Supplementary material for: The Core and Distinction of the Gut Microbiota in Chinese Populations across Geography and Ethnicity
Source: MDPI journal article supplement (doi:10.3390/microorganisms8101579), 2020-10-14

Fig.S2 Combined explanation and exclusive explanation of all bacterium at each taxonomic level and KOs between geographic location and ethnicity by Variation decomposition; “Combined explanation”, “Geography exclusive explanation” and “Ethnicity exclusive explanation” was respectively expressed by loess lines (span = 0.5) in black, blue and red; The X-axis represents rank-ordered of the average of bacterium or KOs proportion; The Y-axis represents Adjusted R square.

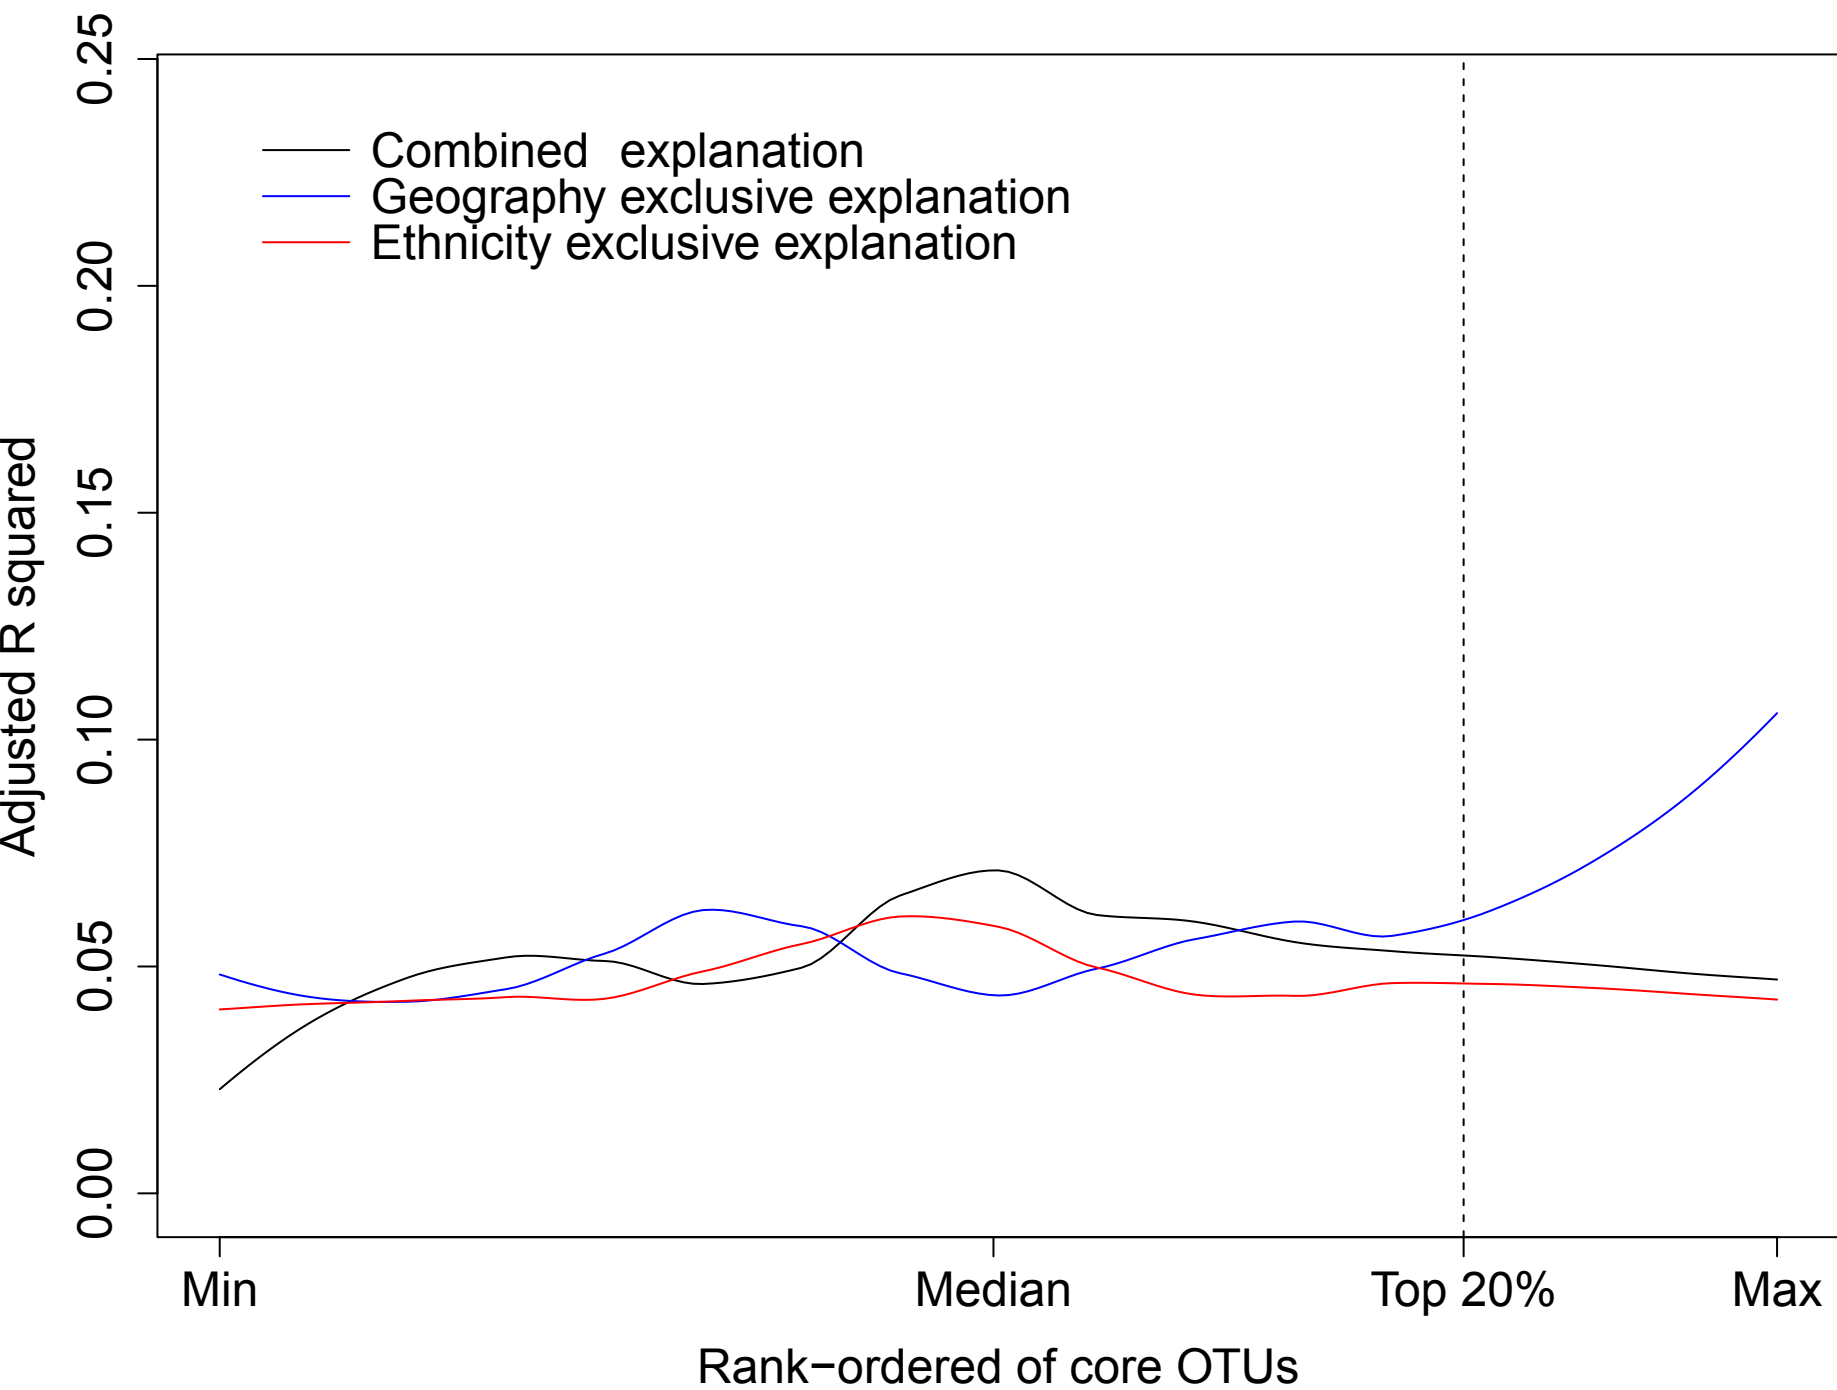

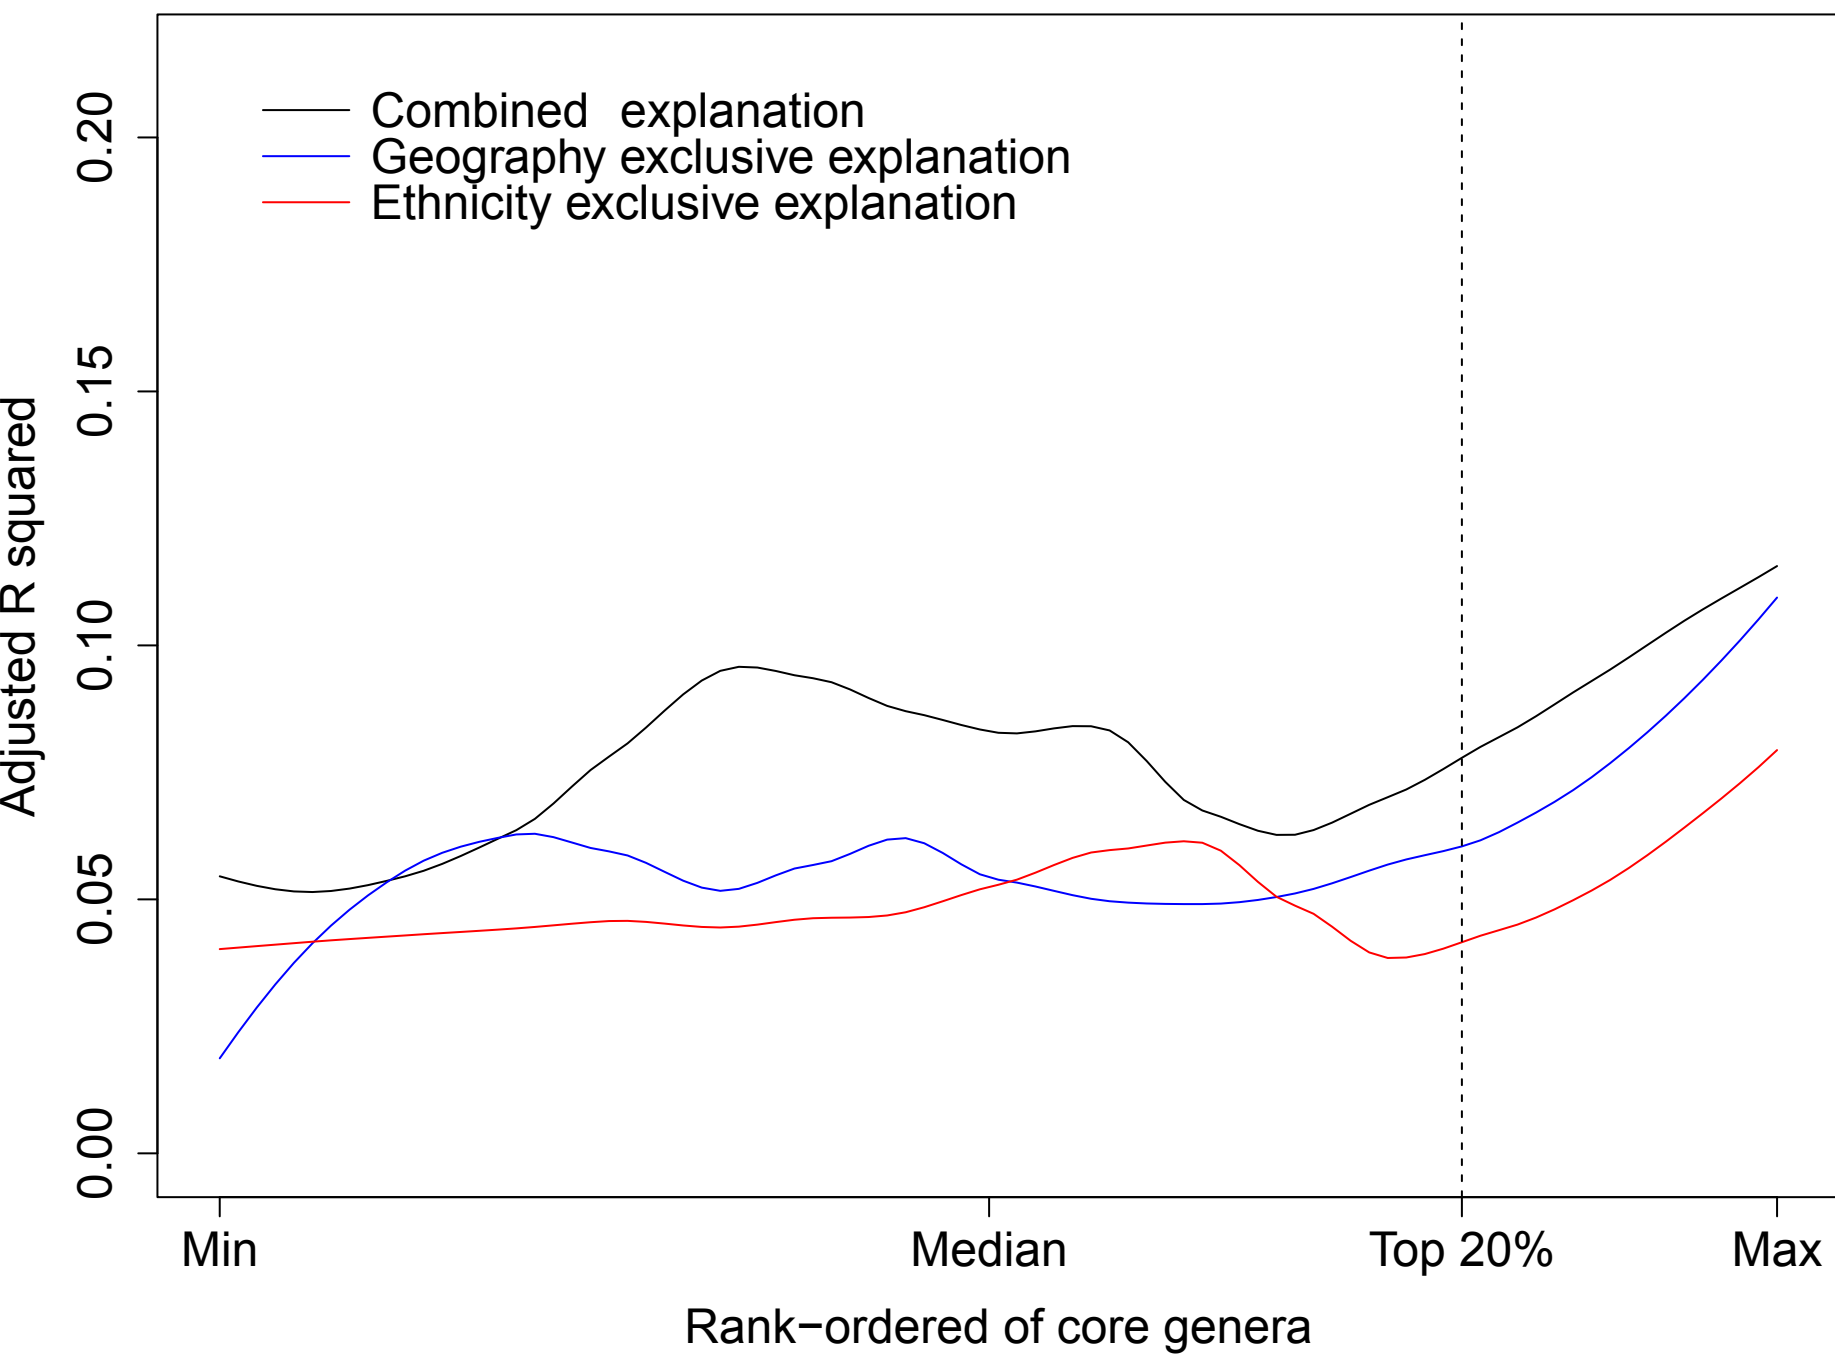

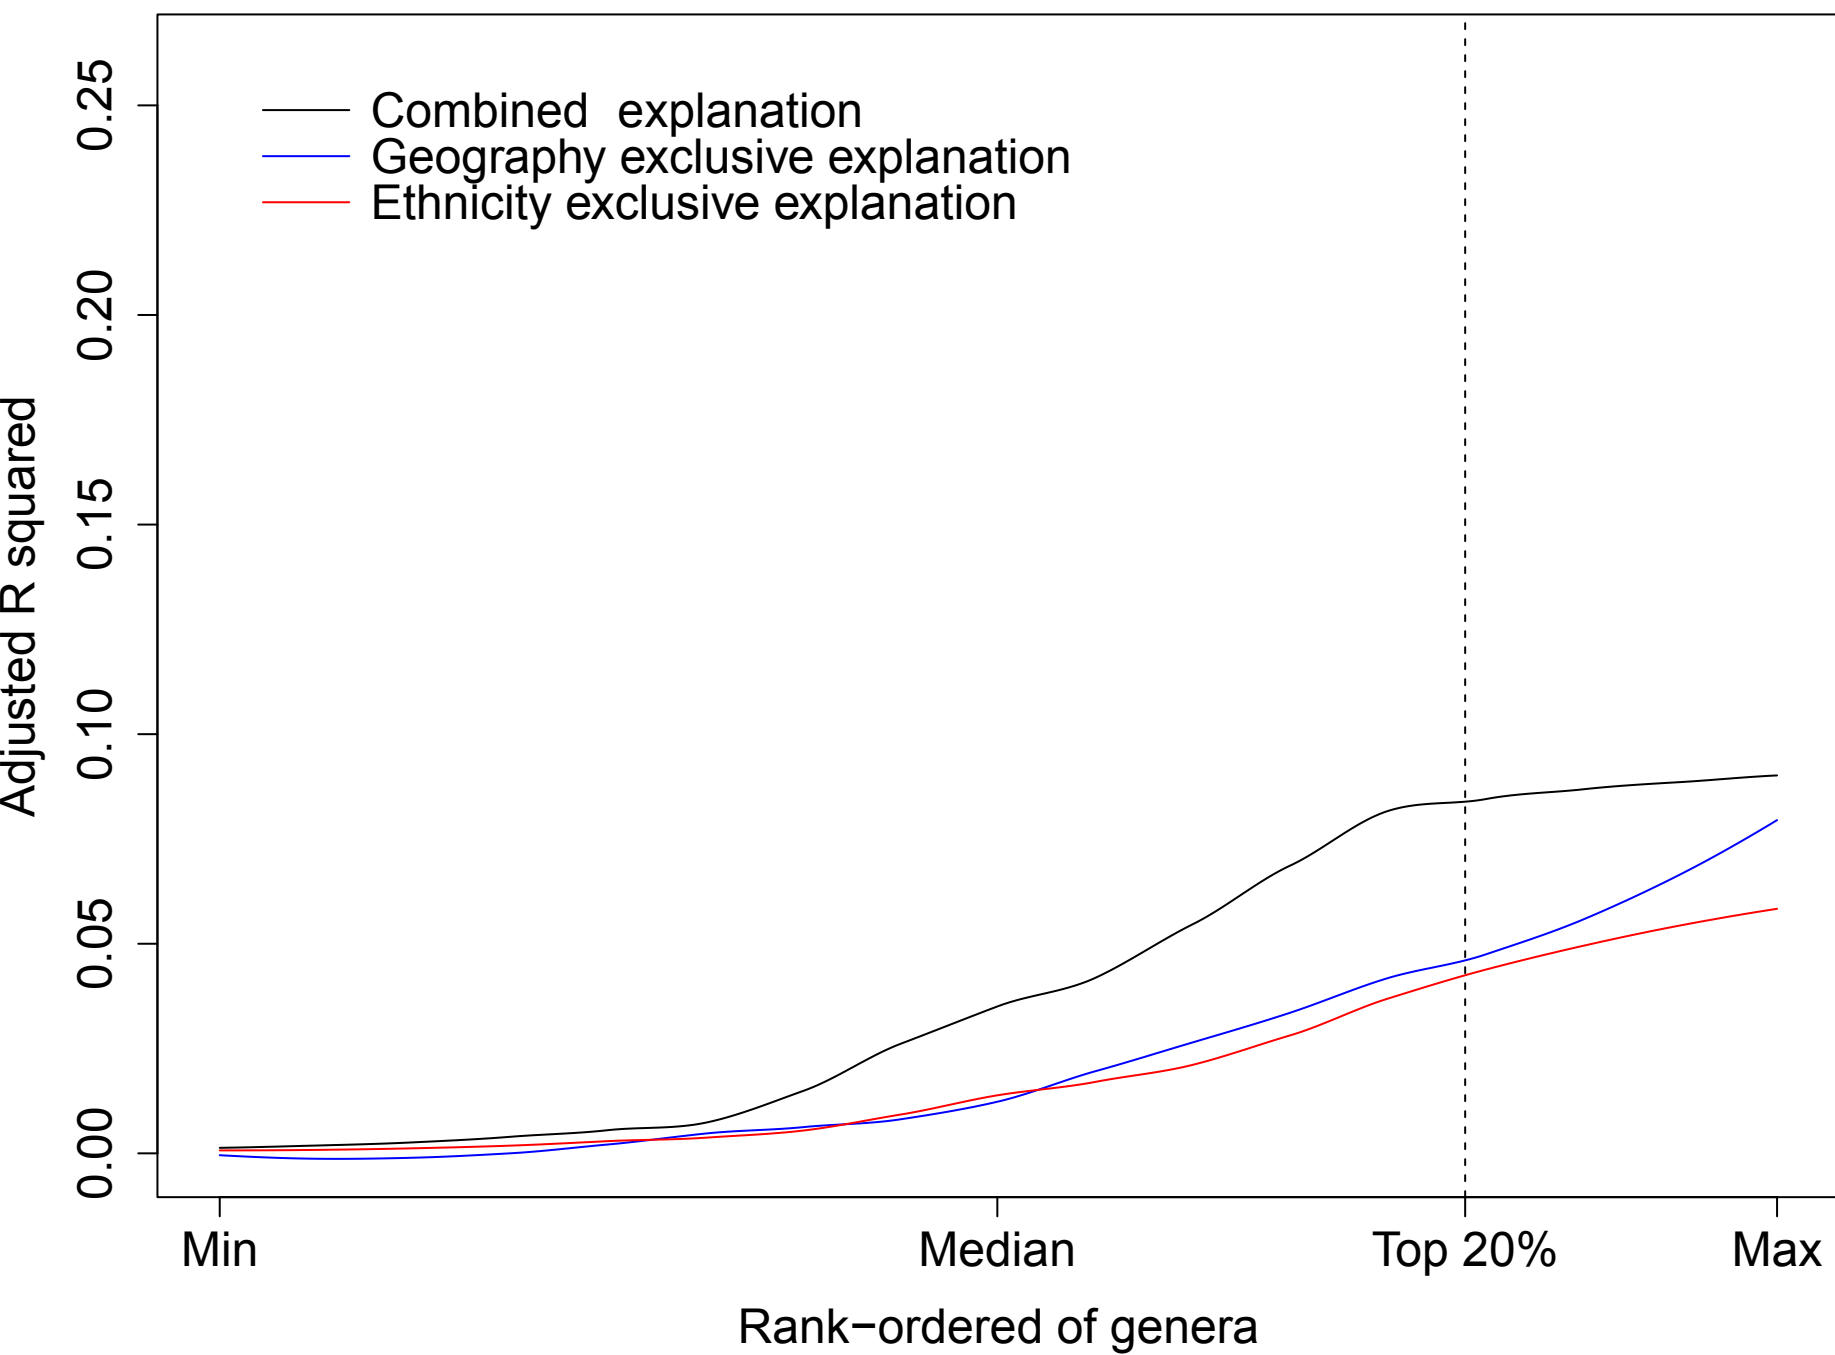

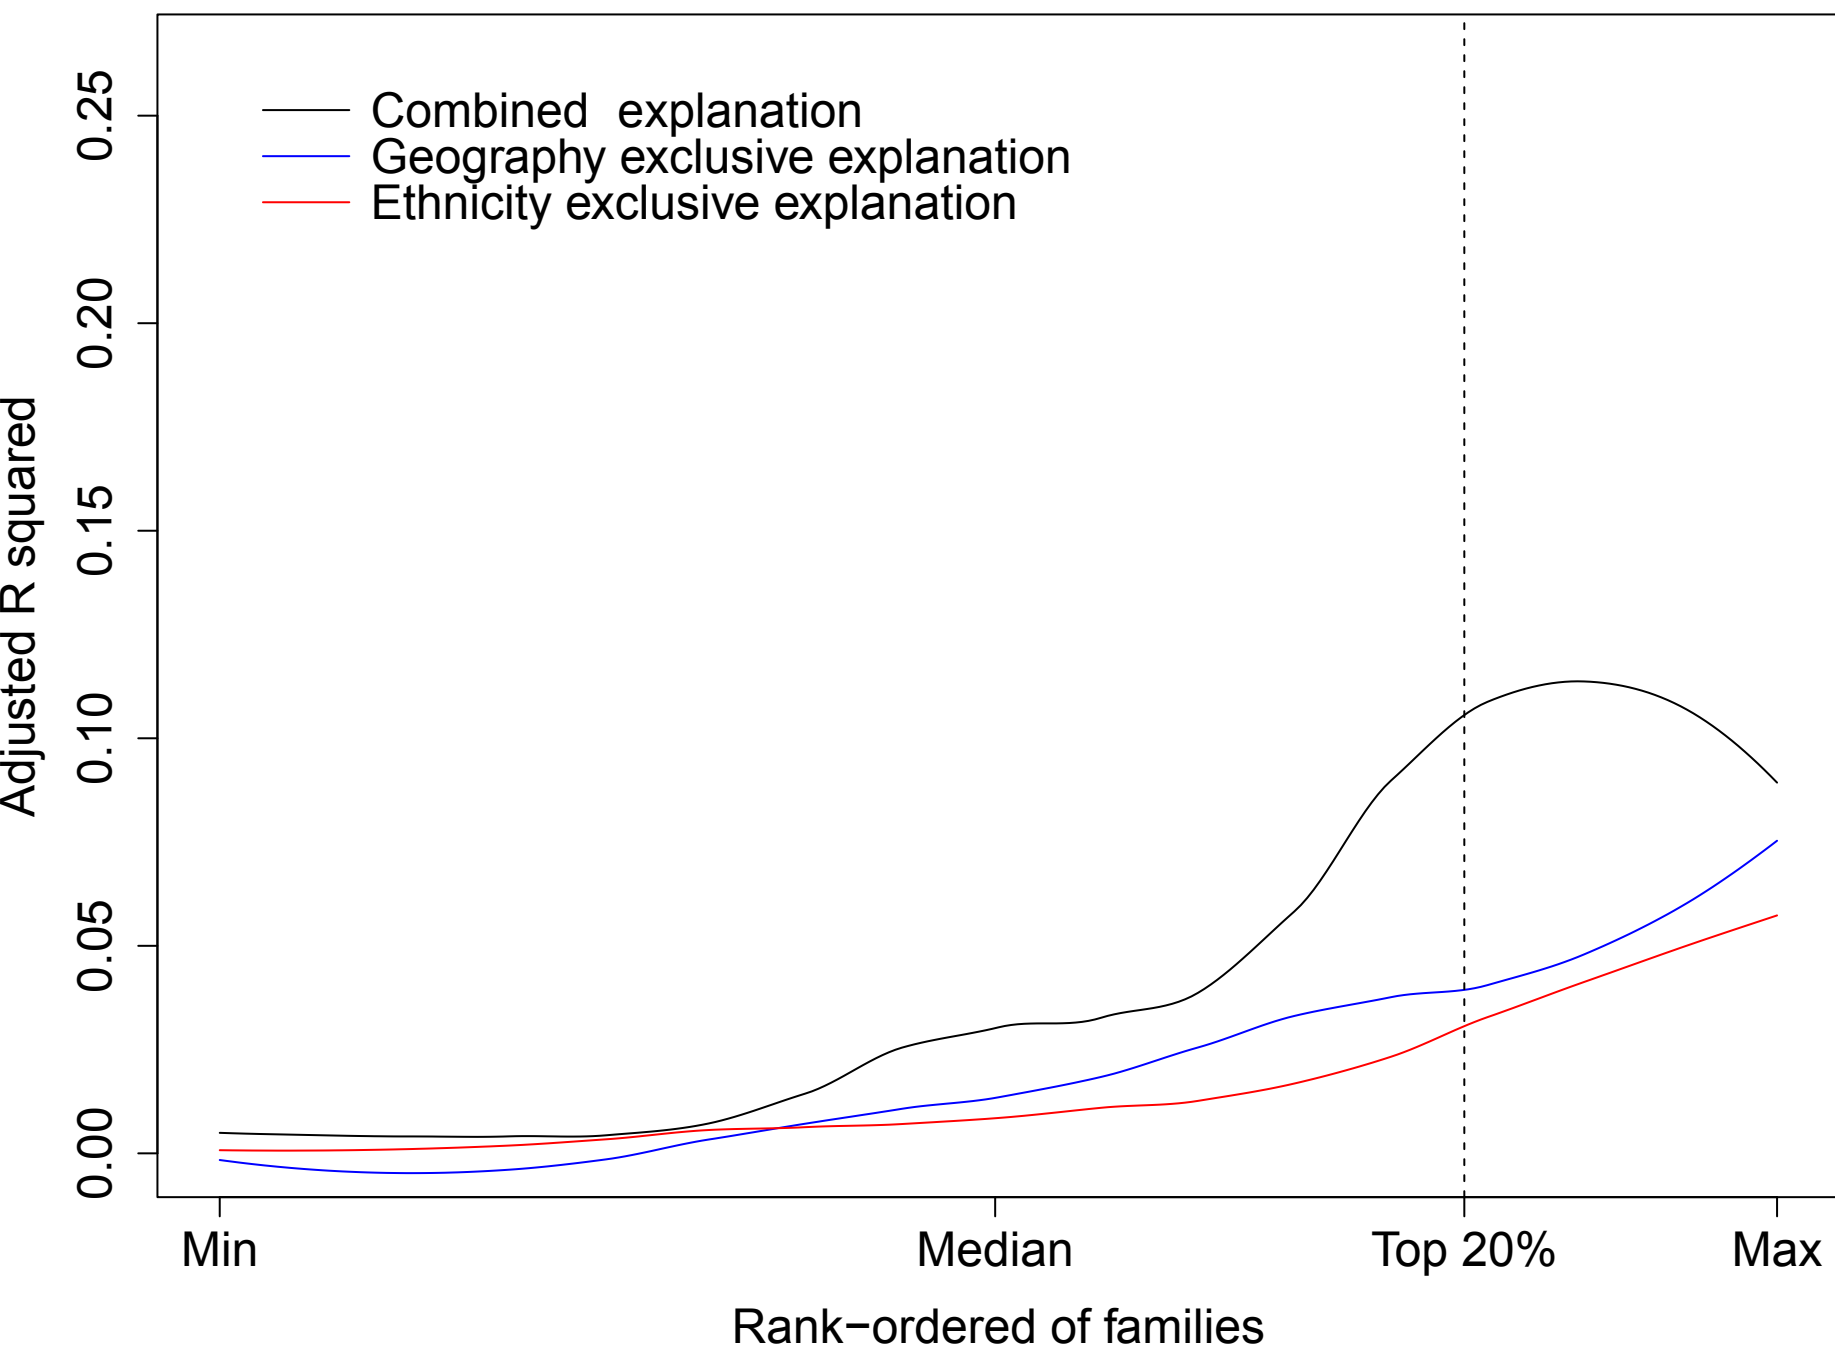

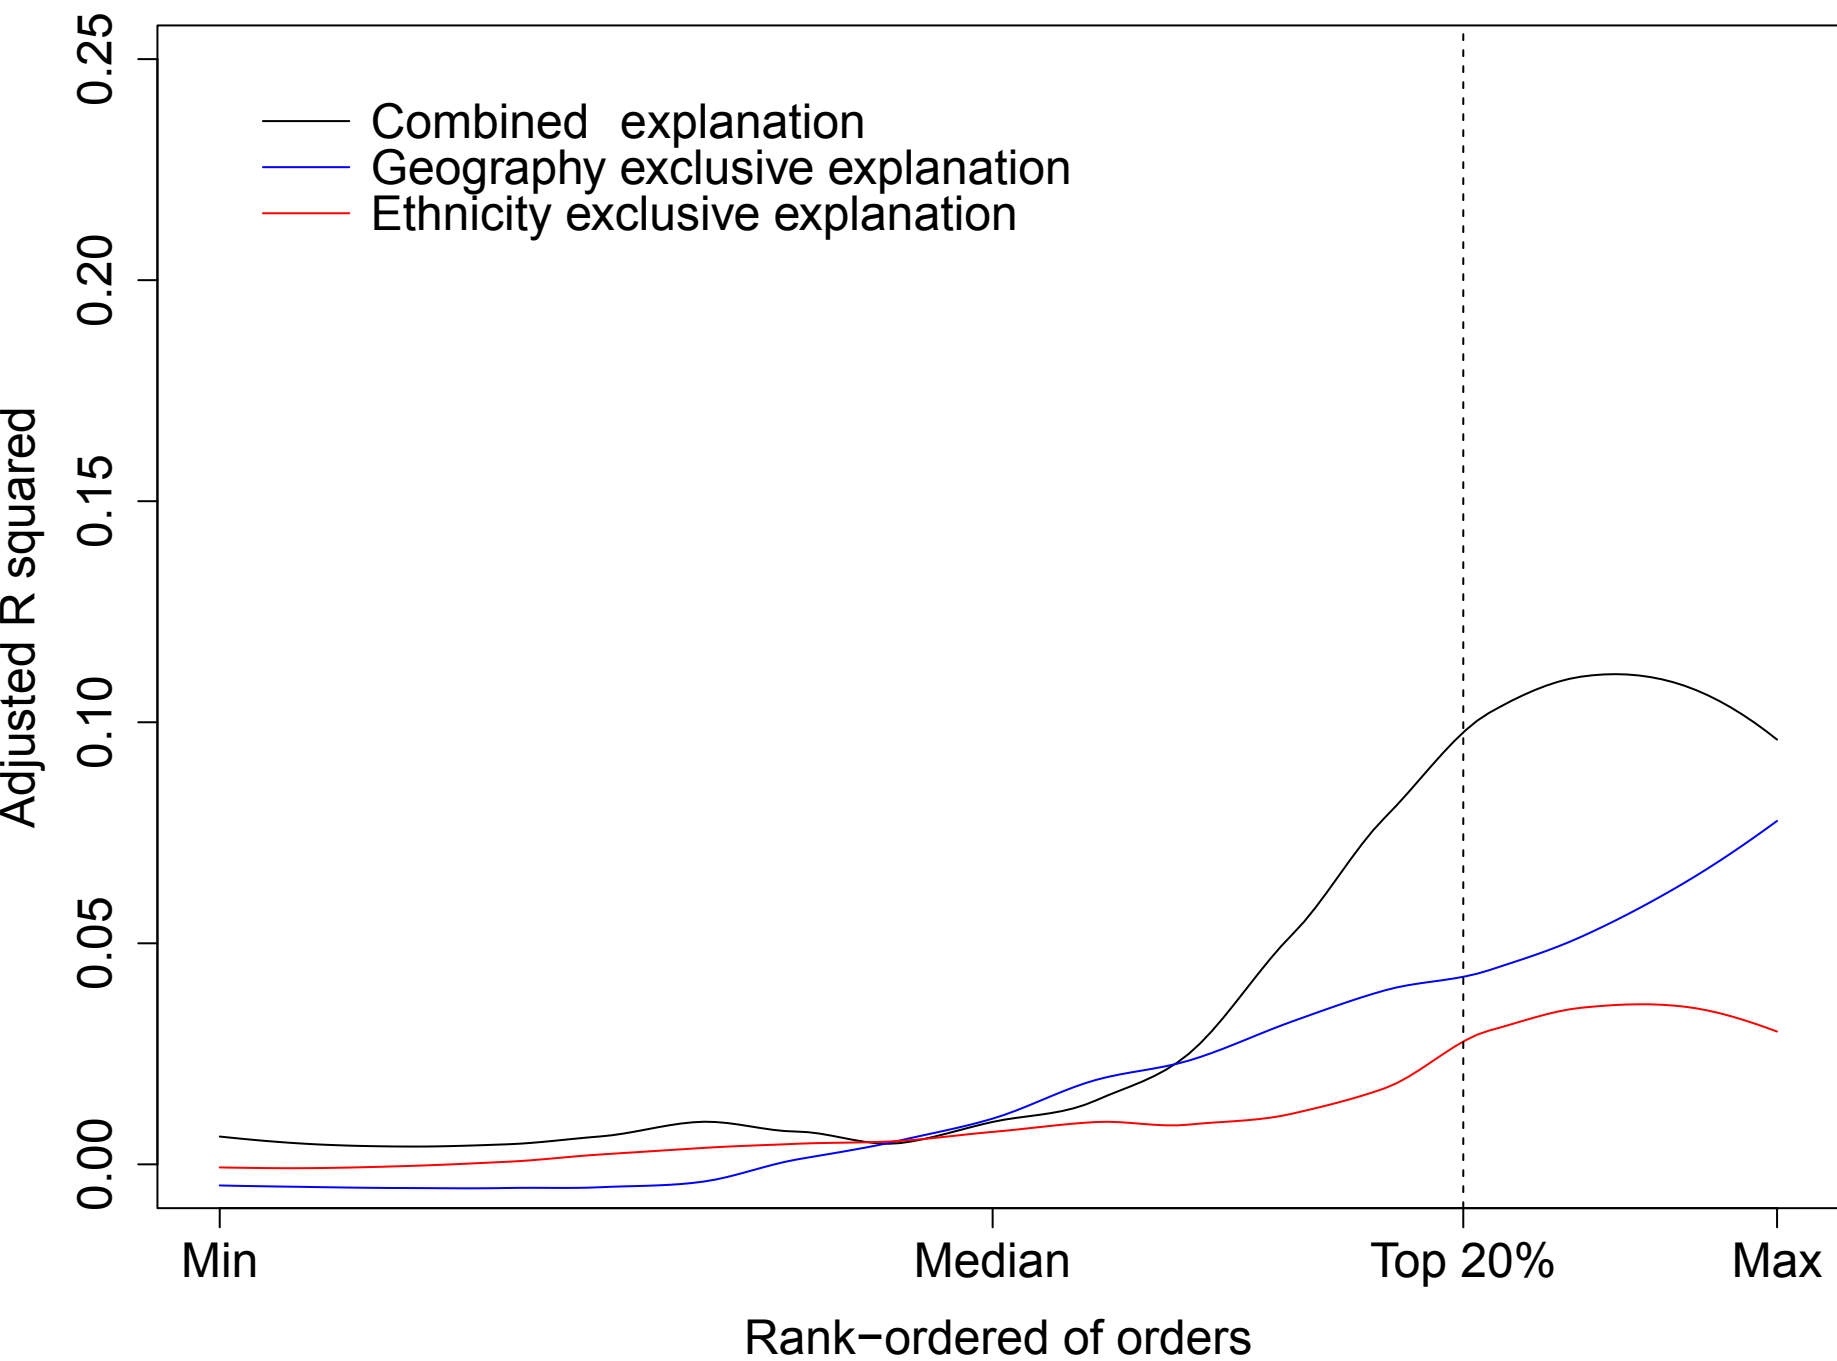

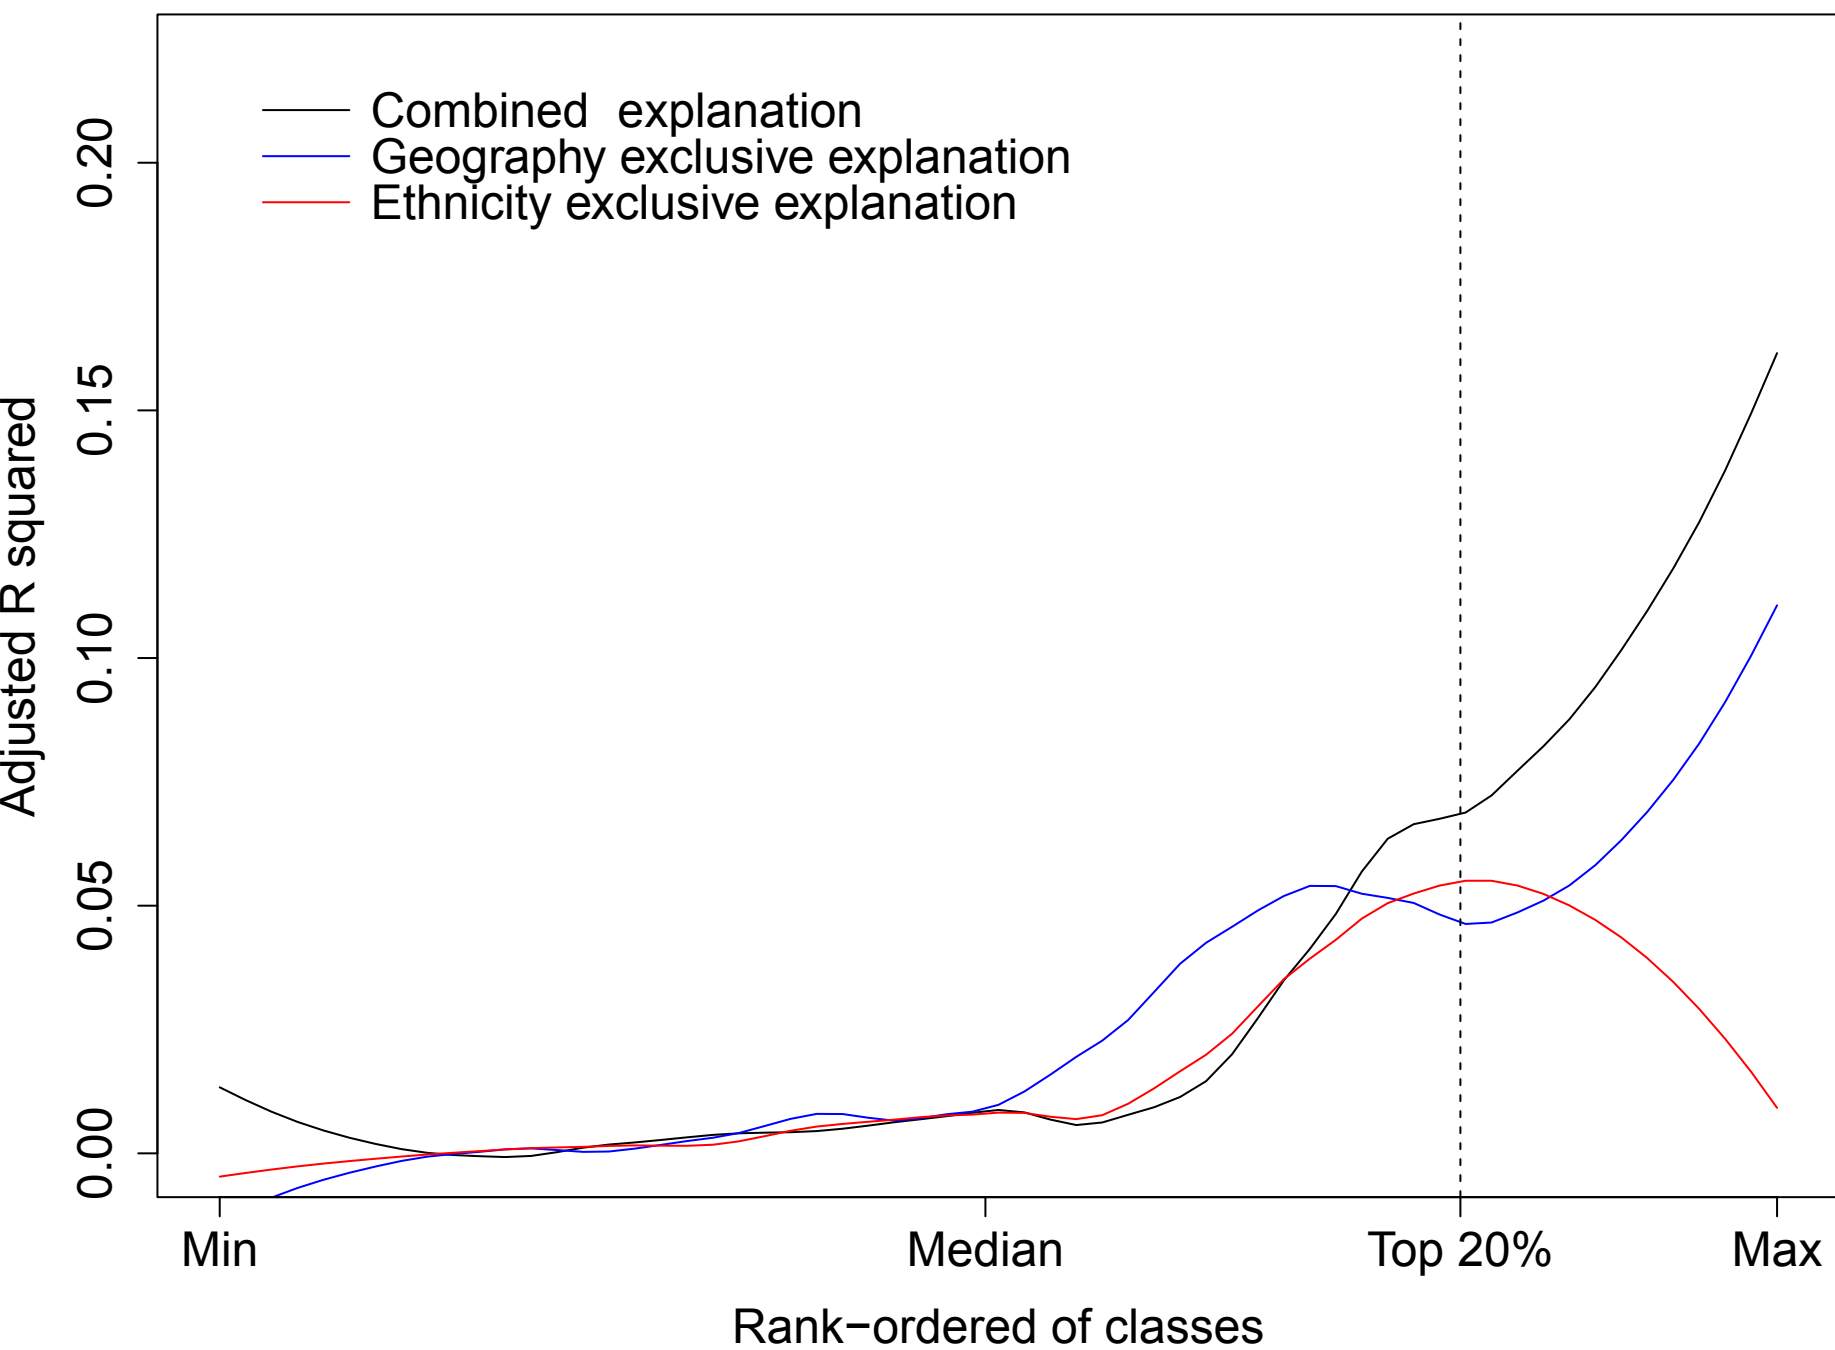

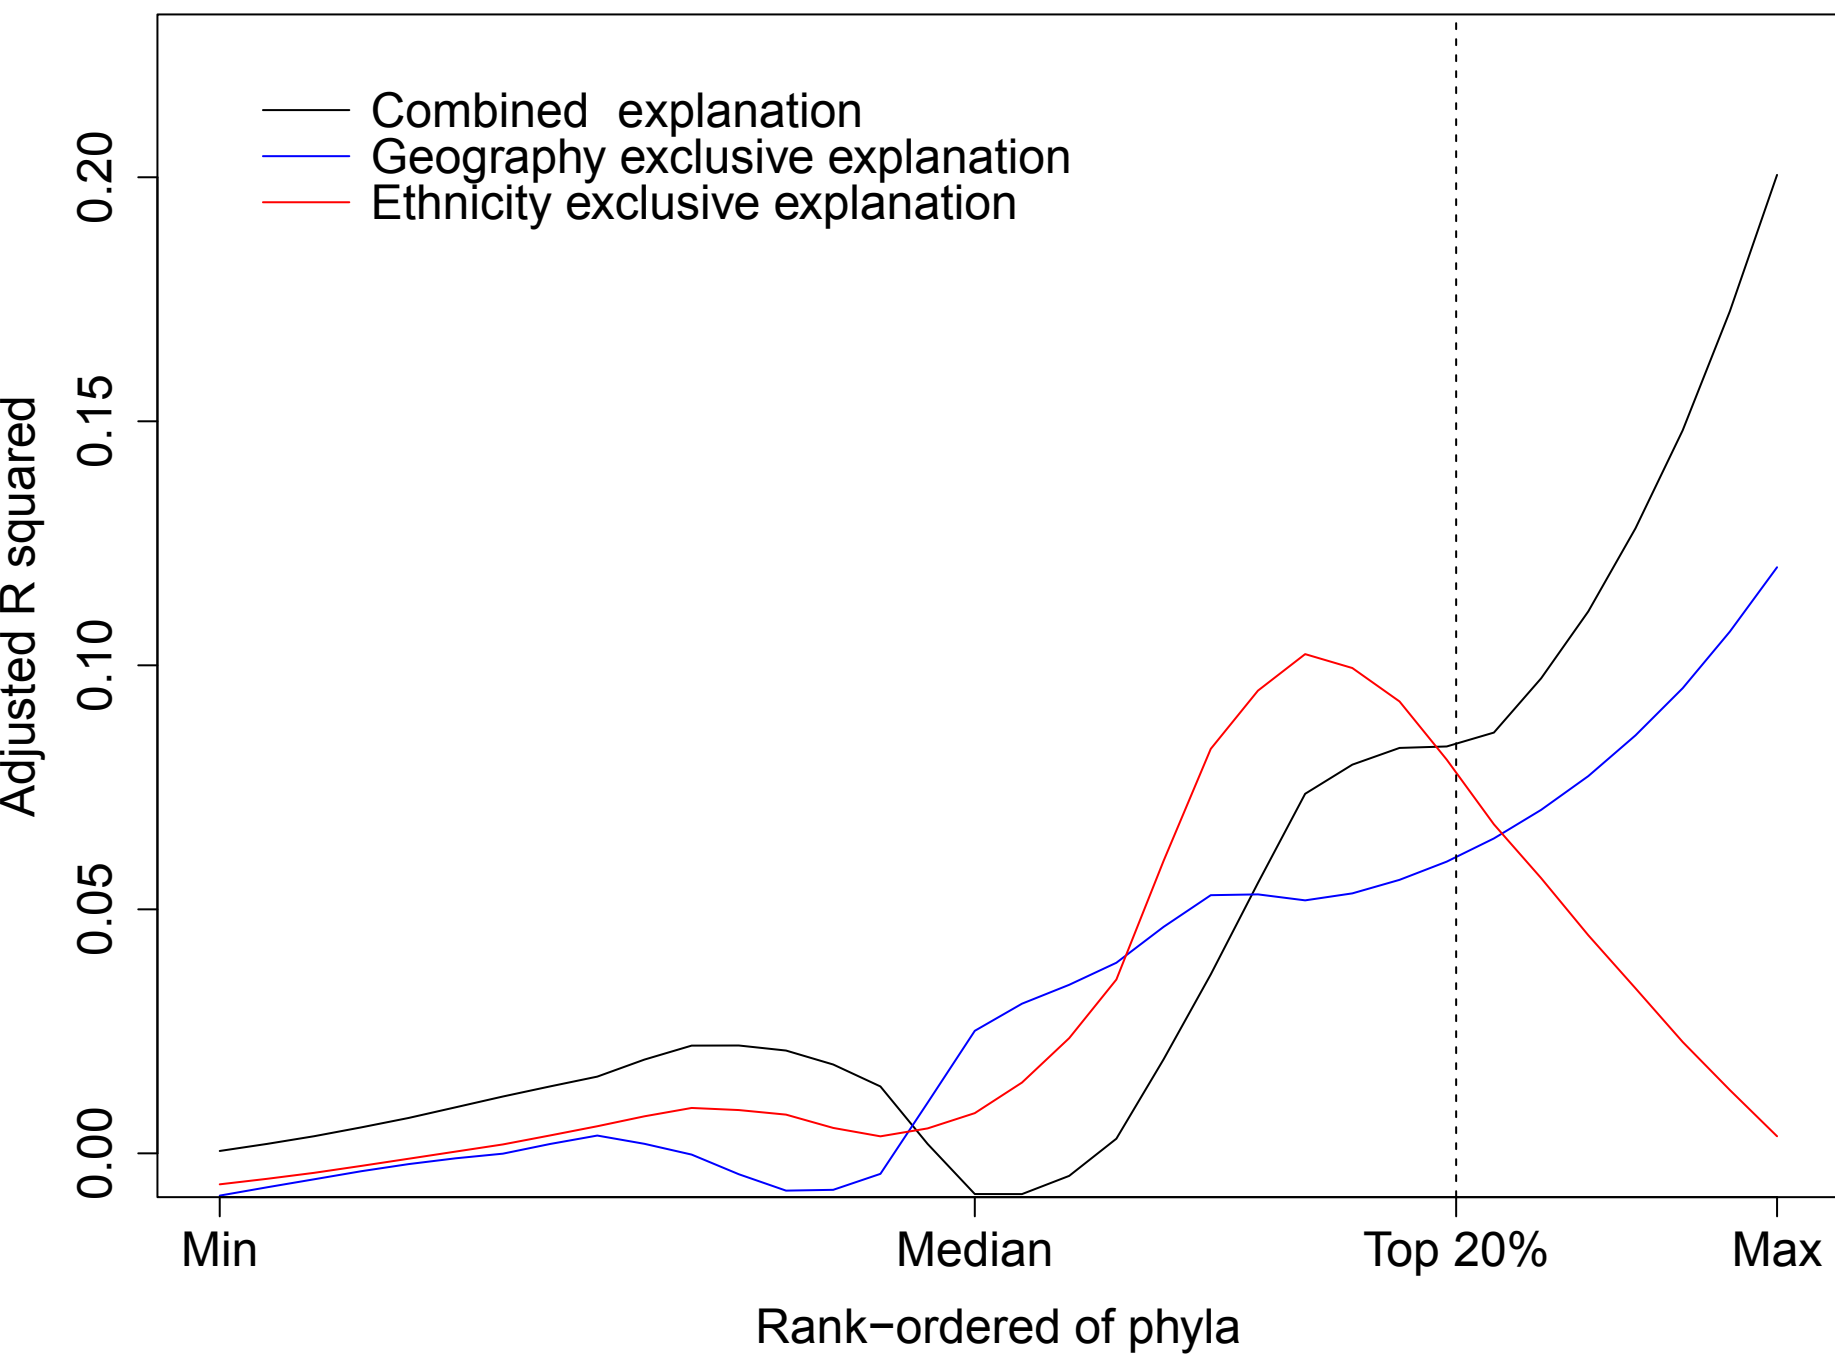



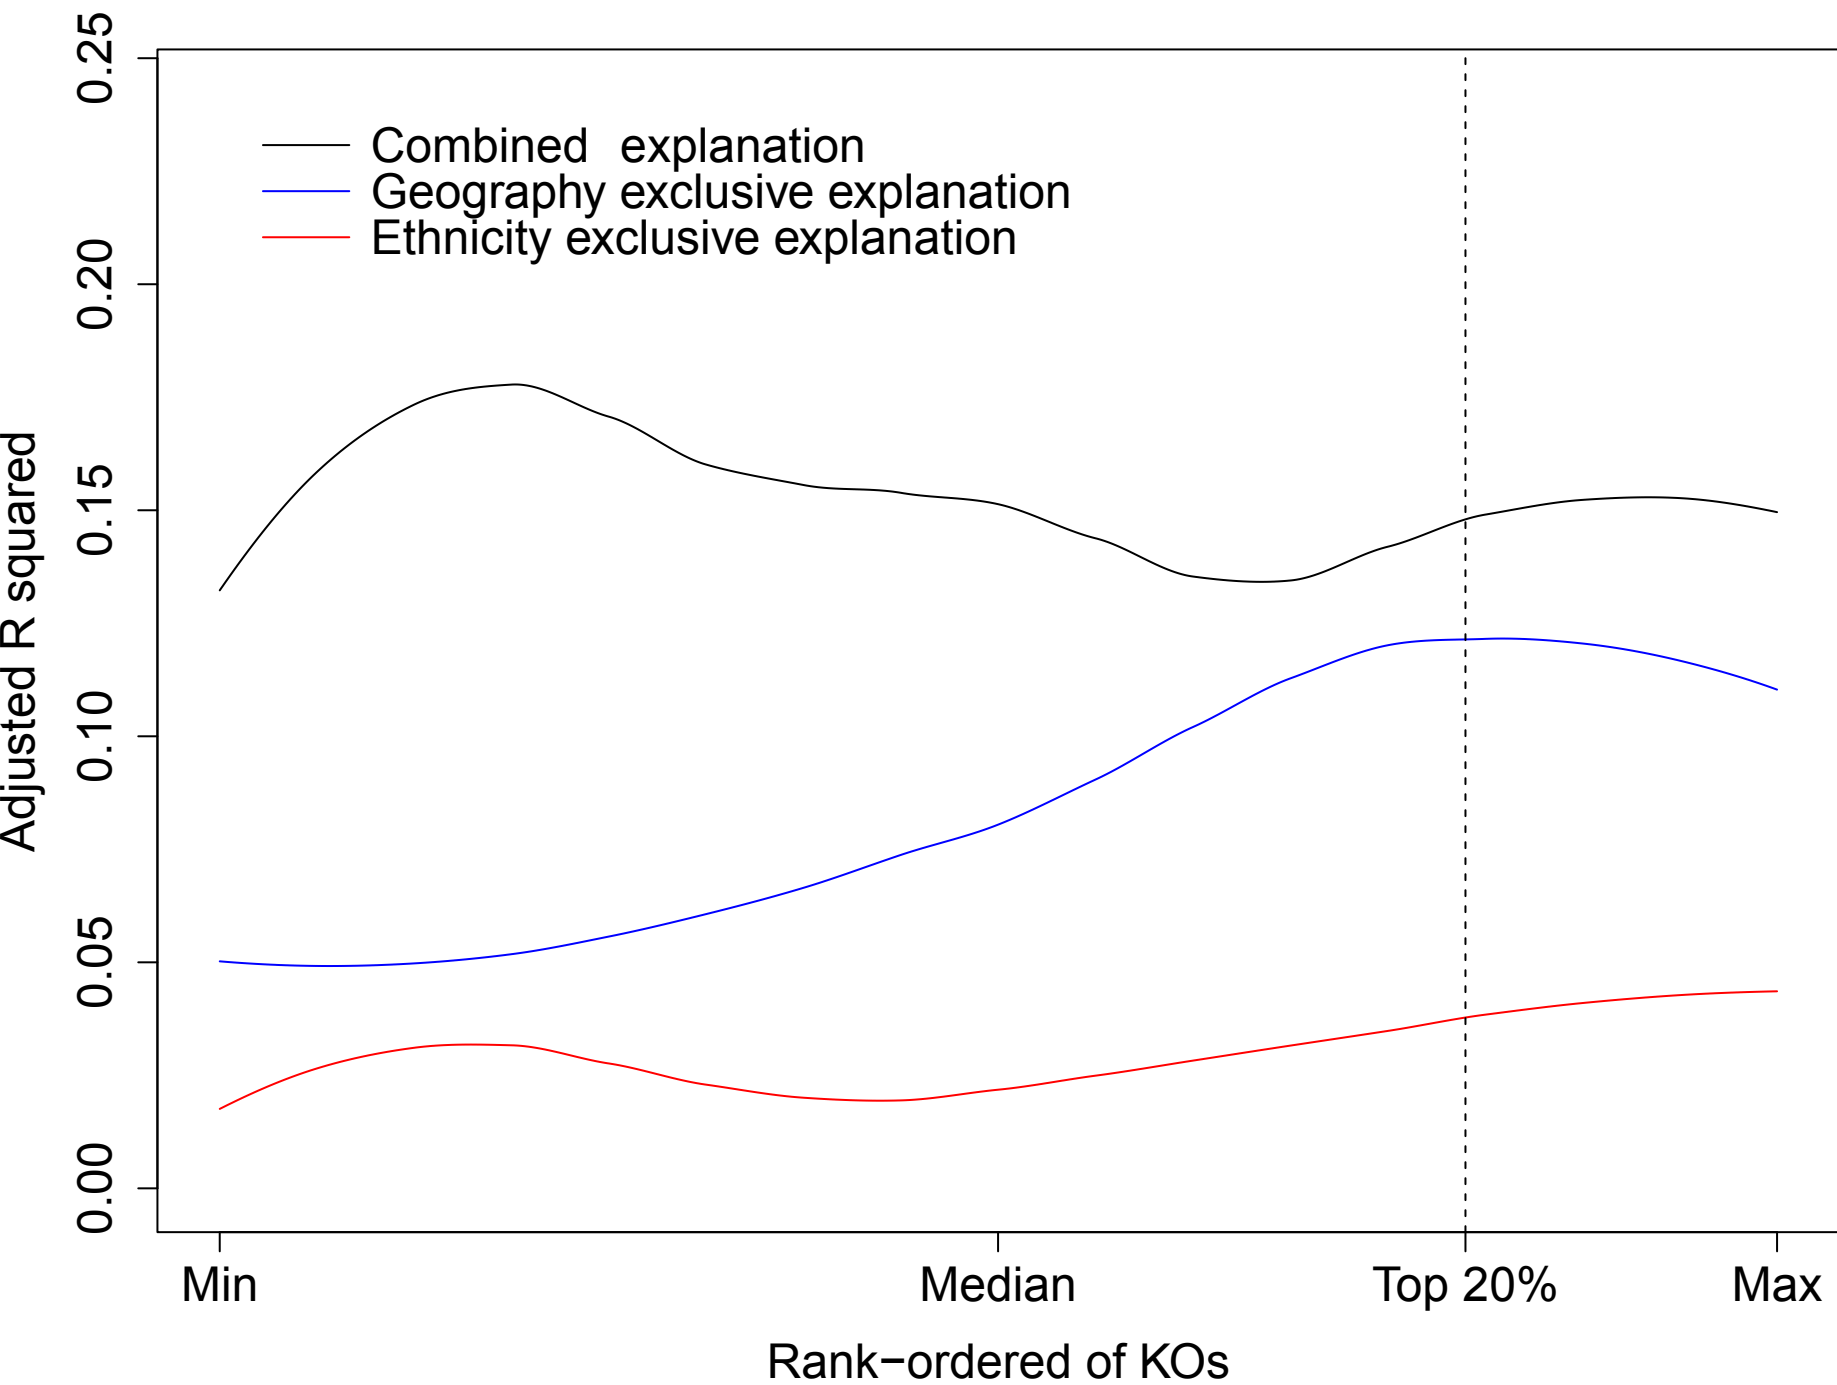

Supplement: s1 [file s1]
