# Supplementary figures and images for: The Core and Distinction of the Gut Microbiota in Chinese Populations across Geography and Ethnicity
Source: MDPI journal article supplement (doi:10.3390/microorganisms8101579), 2020-10-14

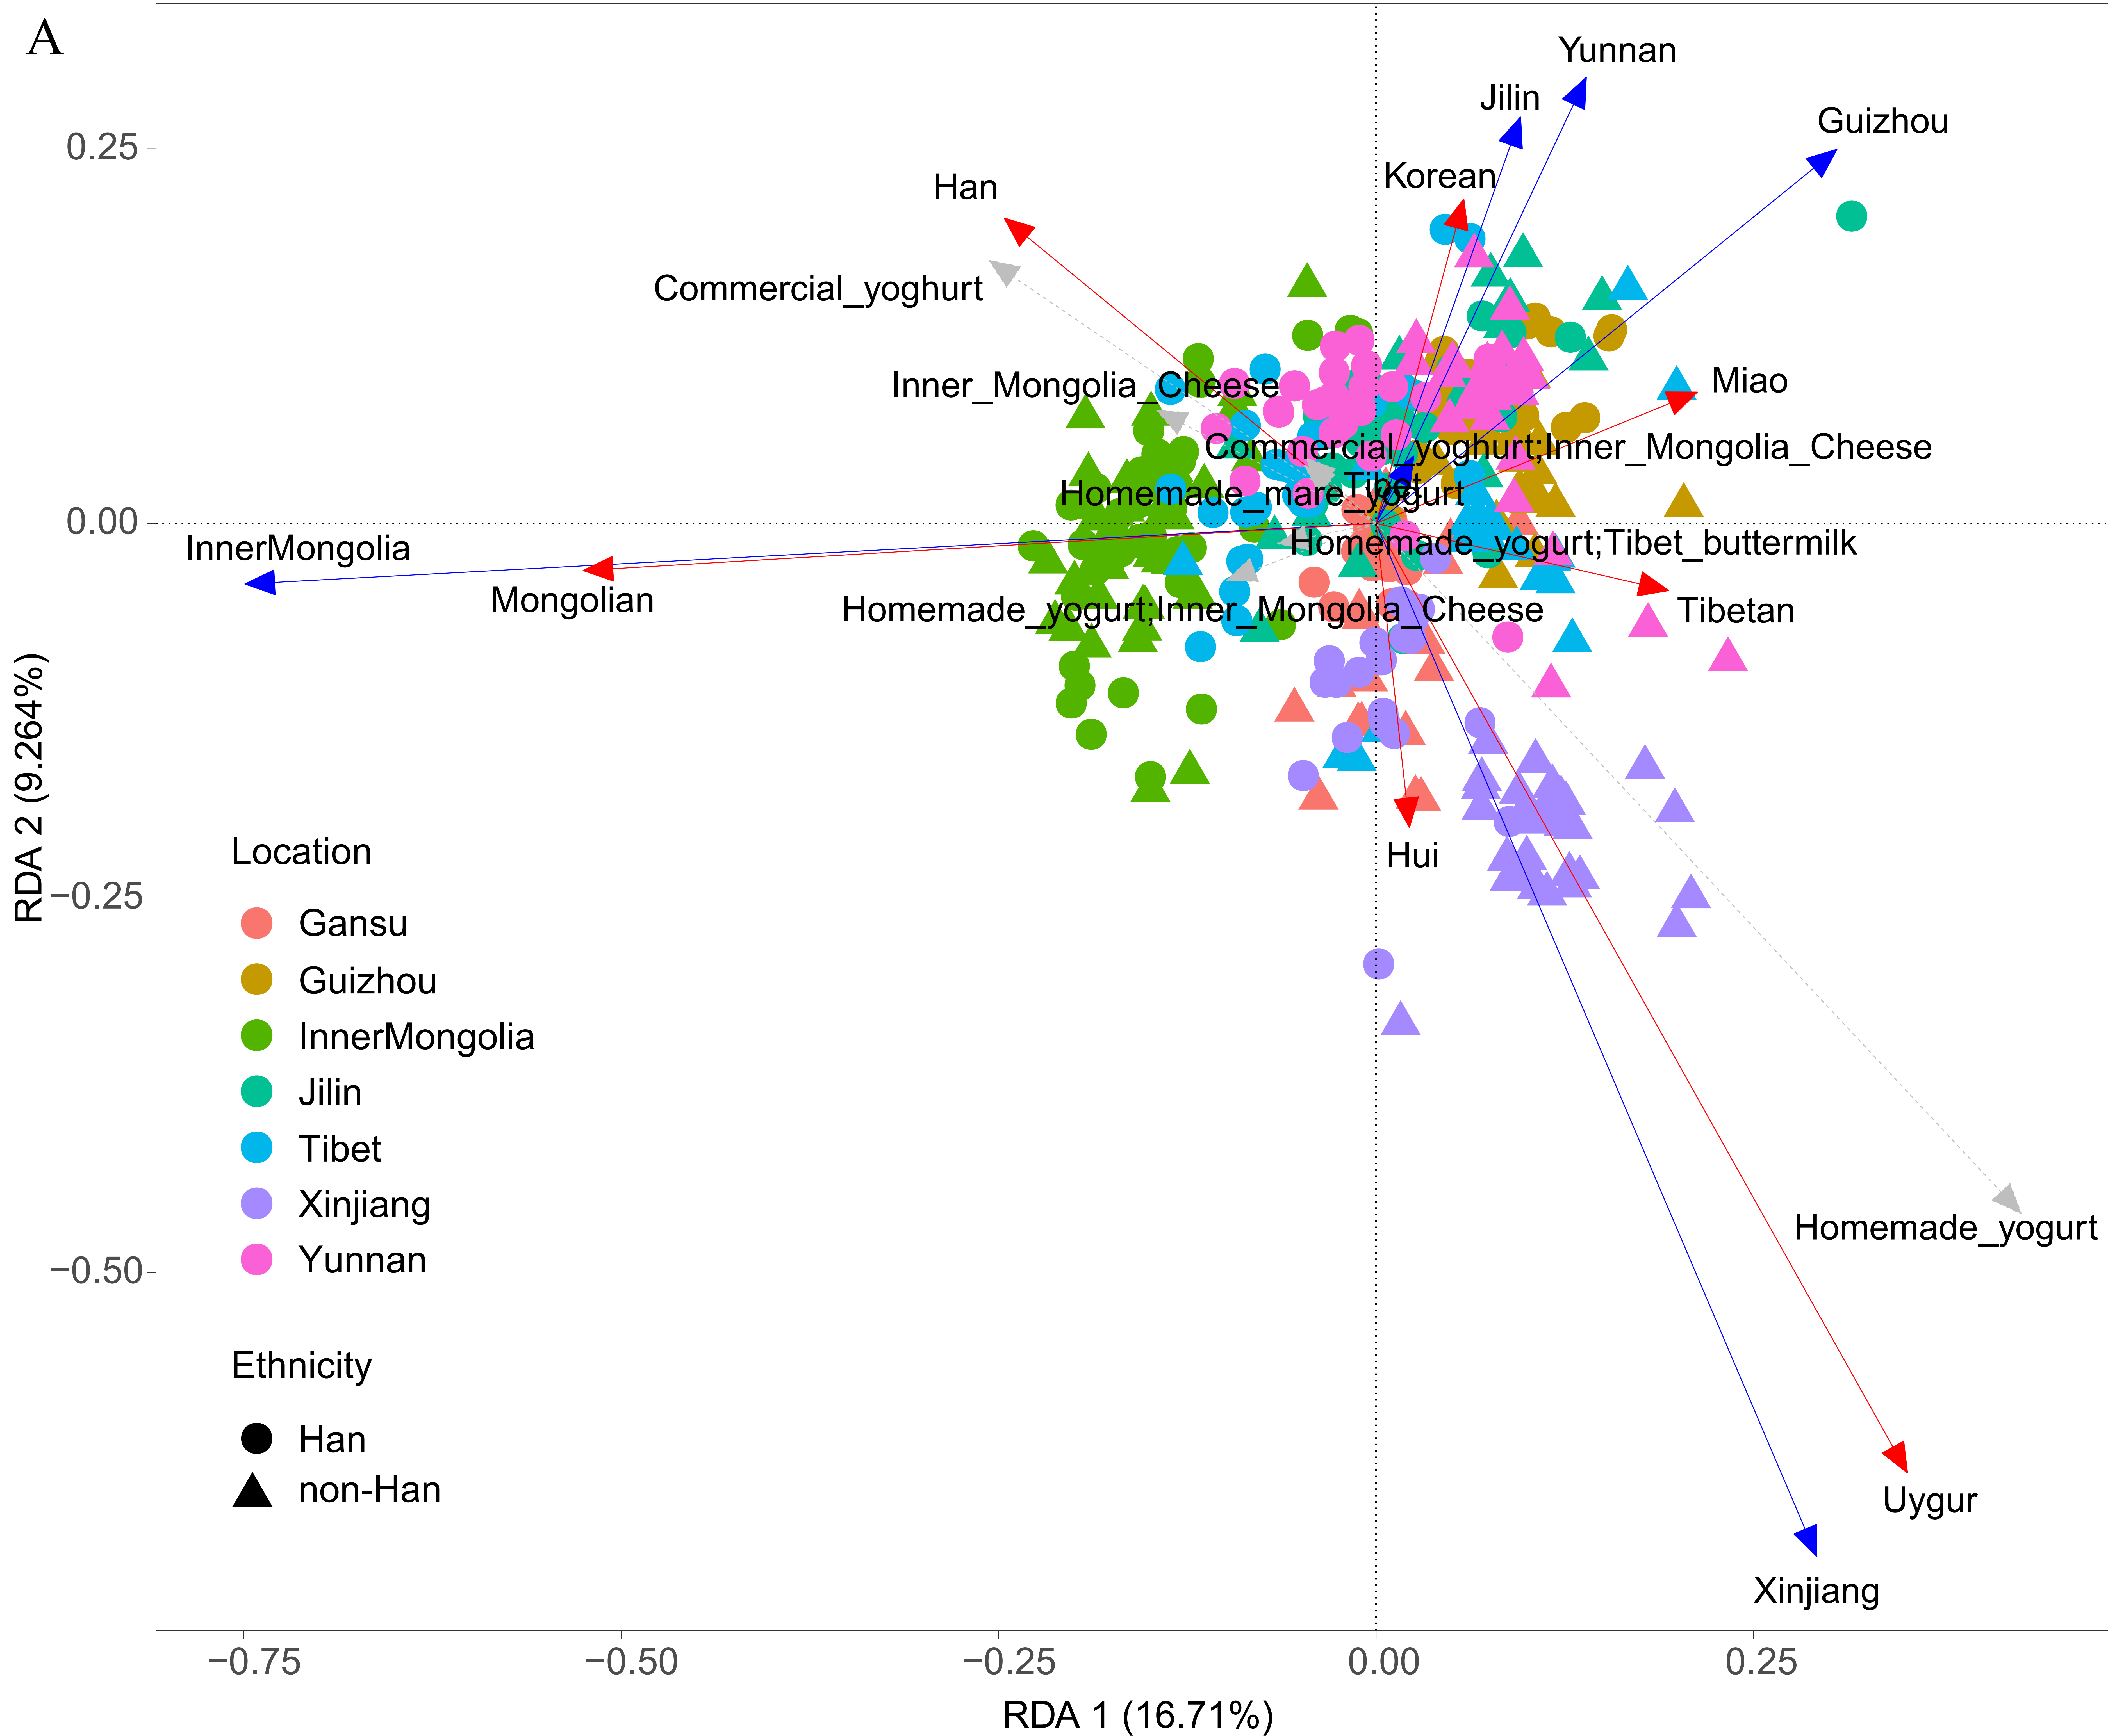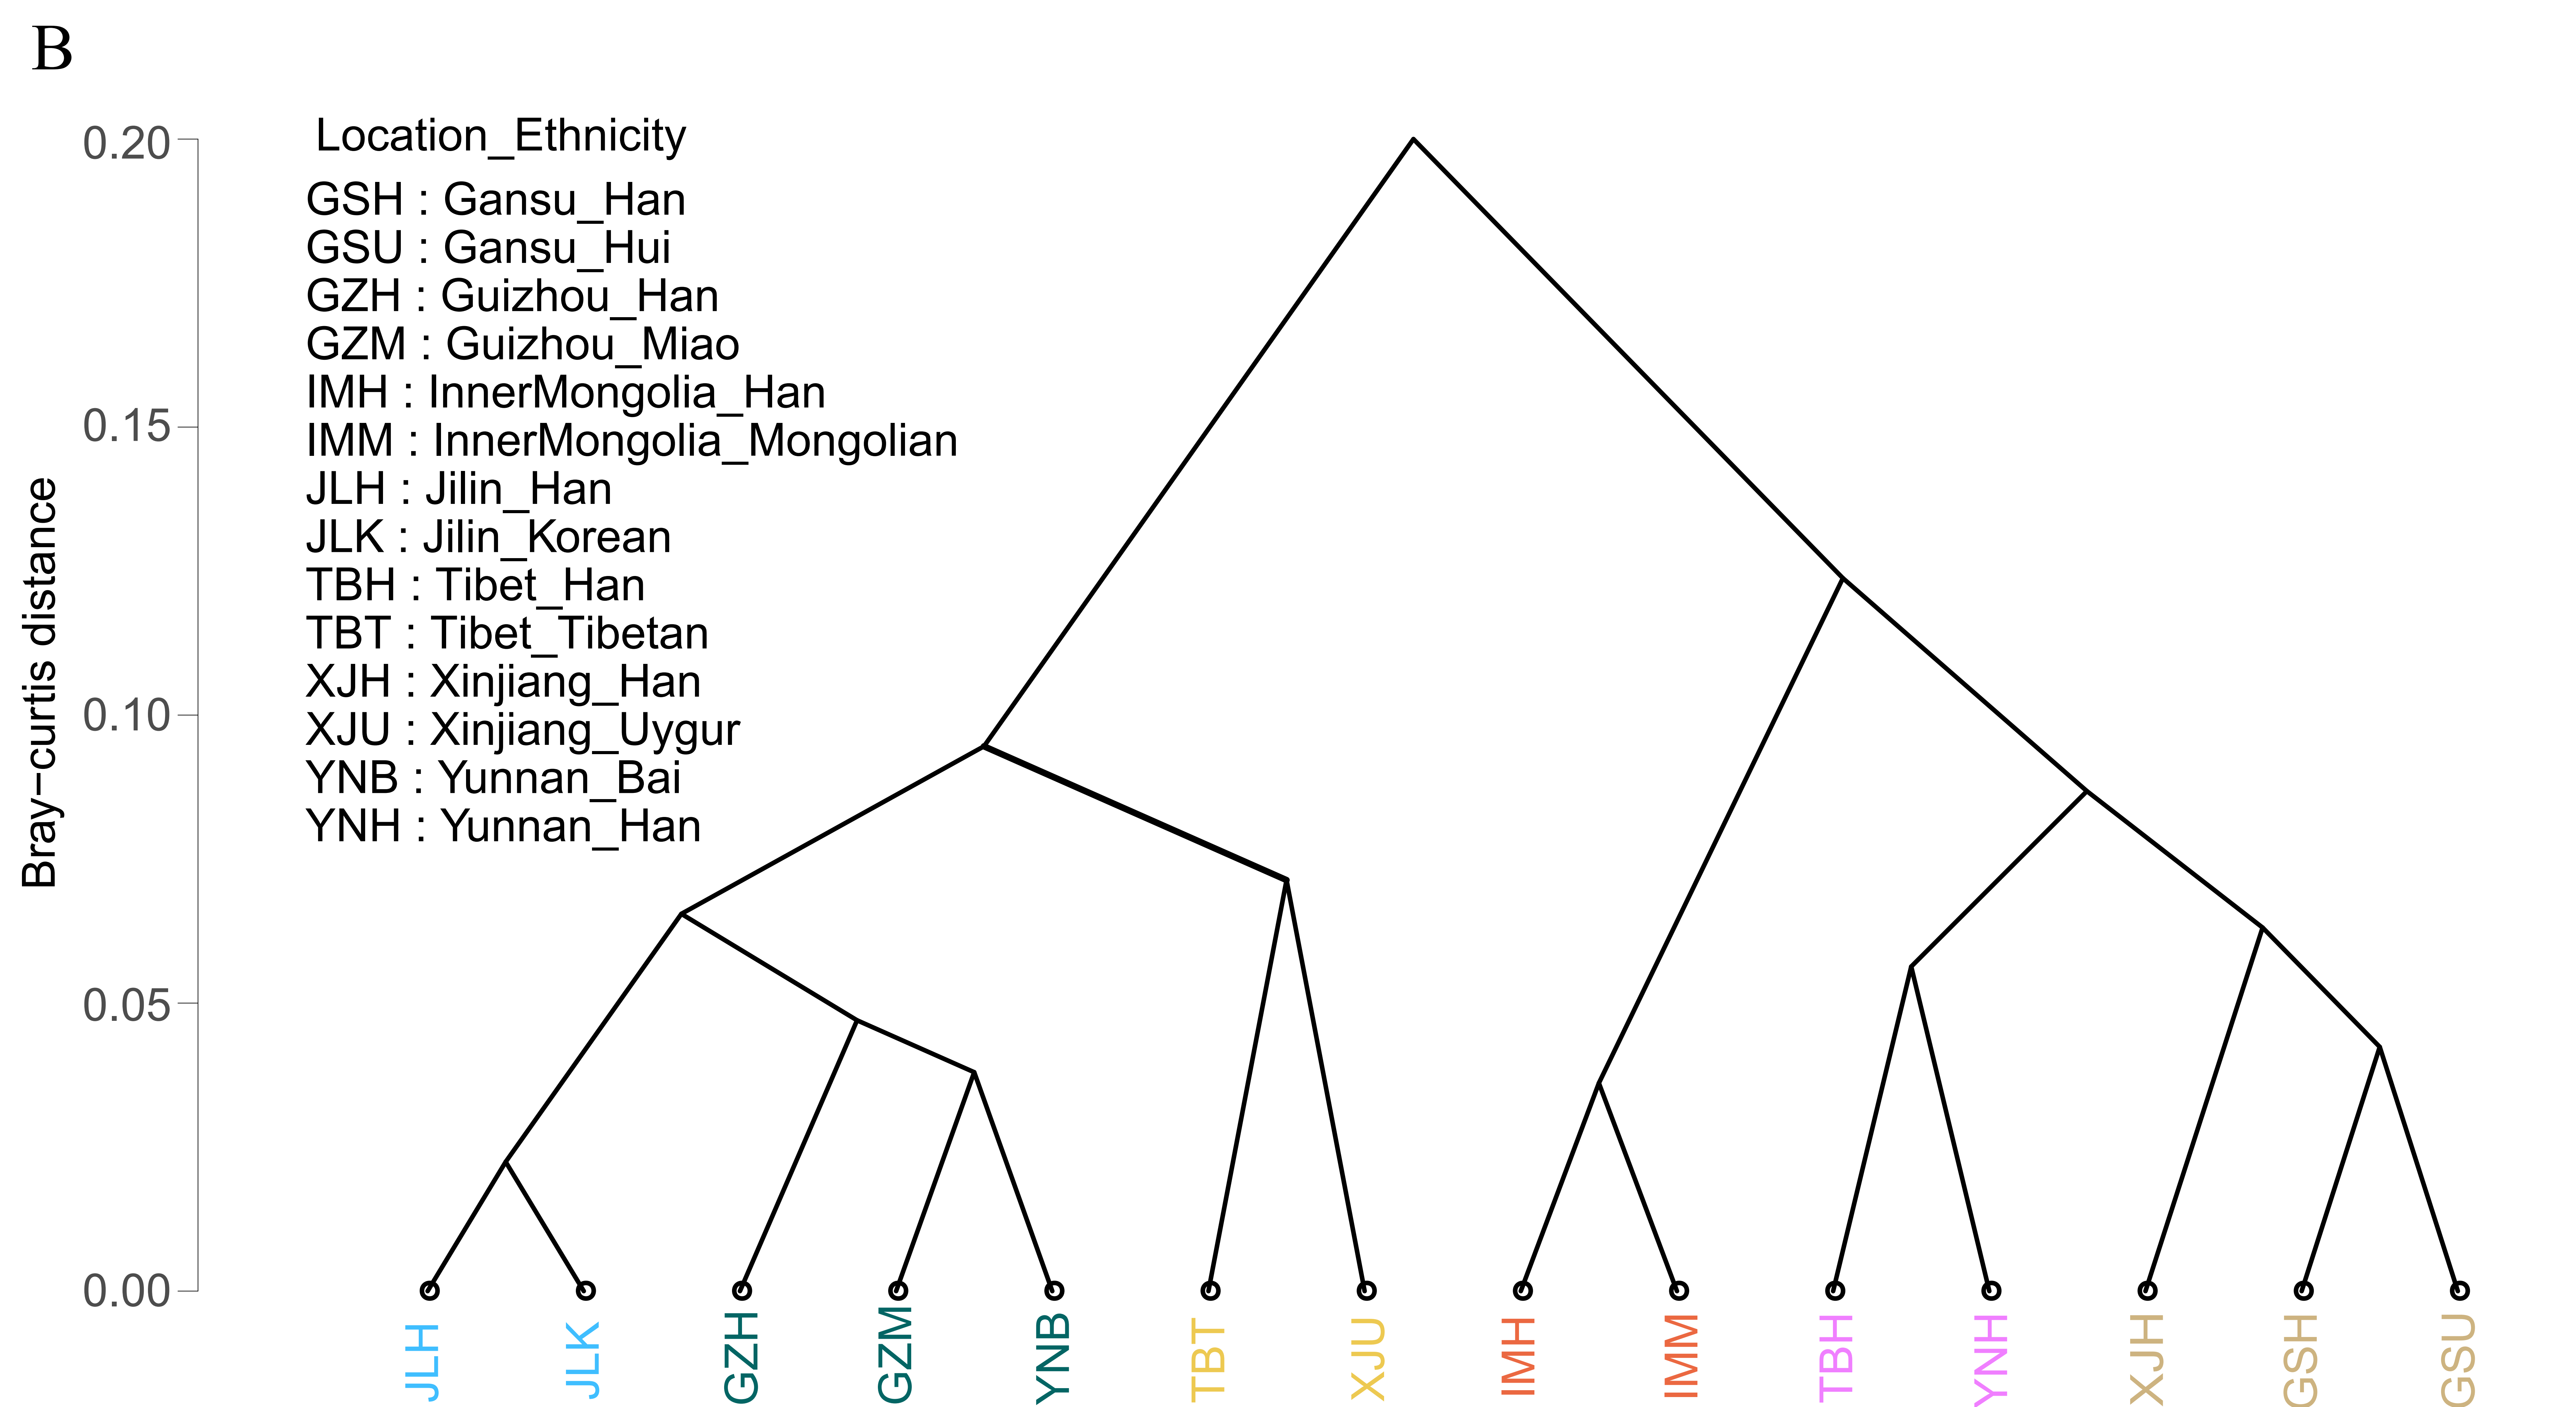

Supplement: s1 [file s1]

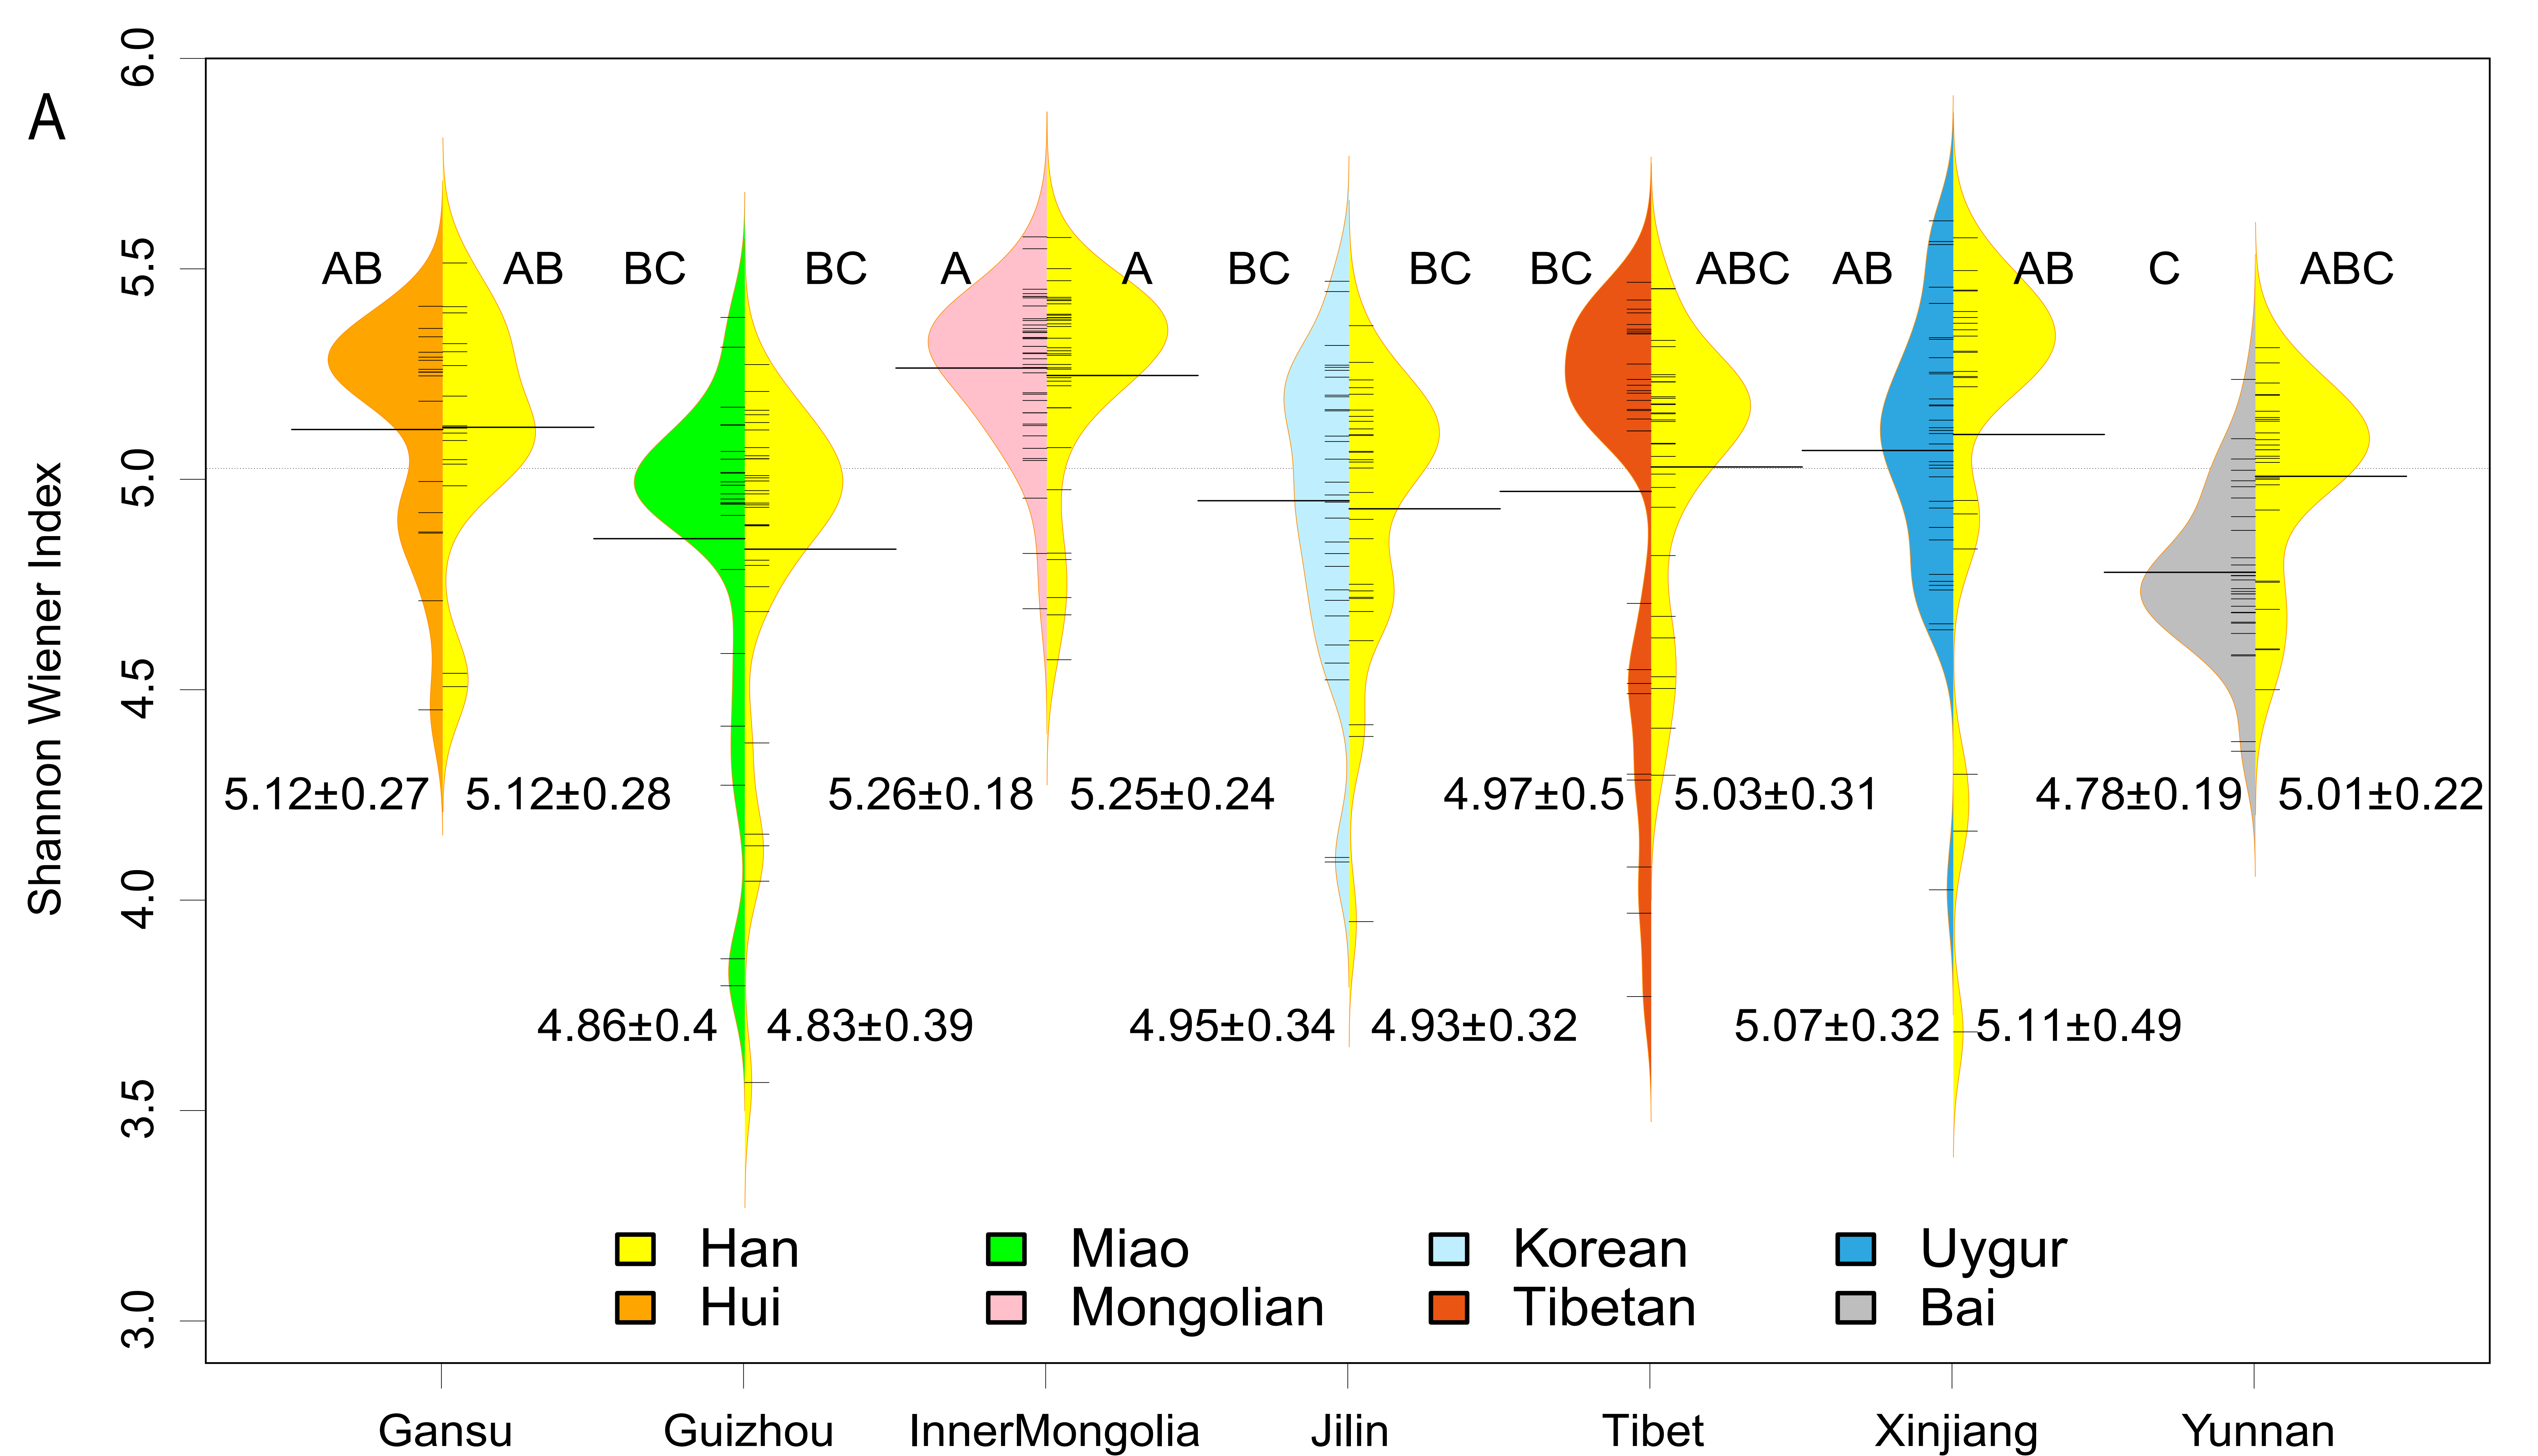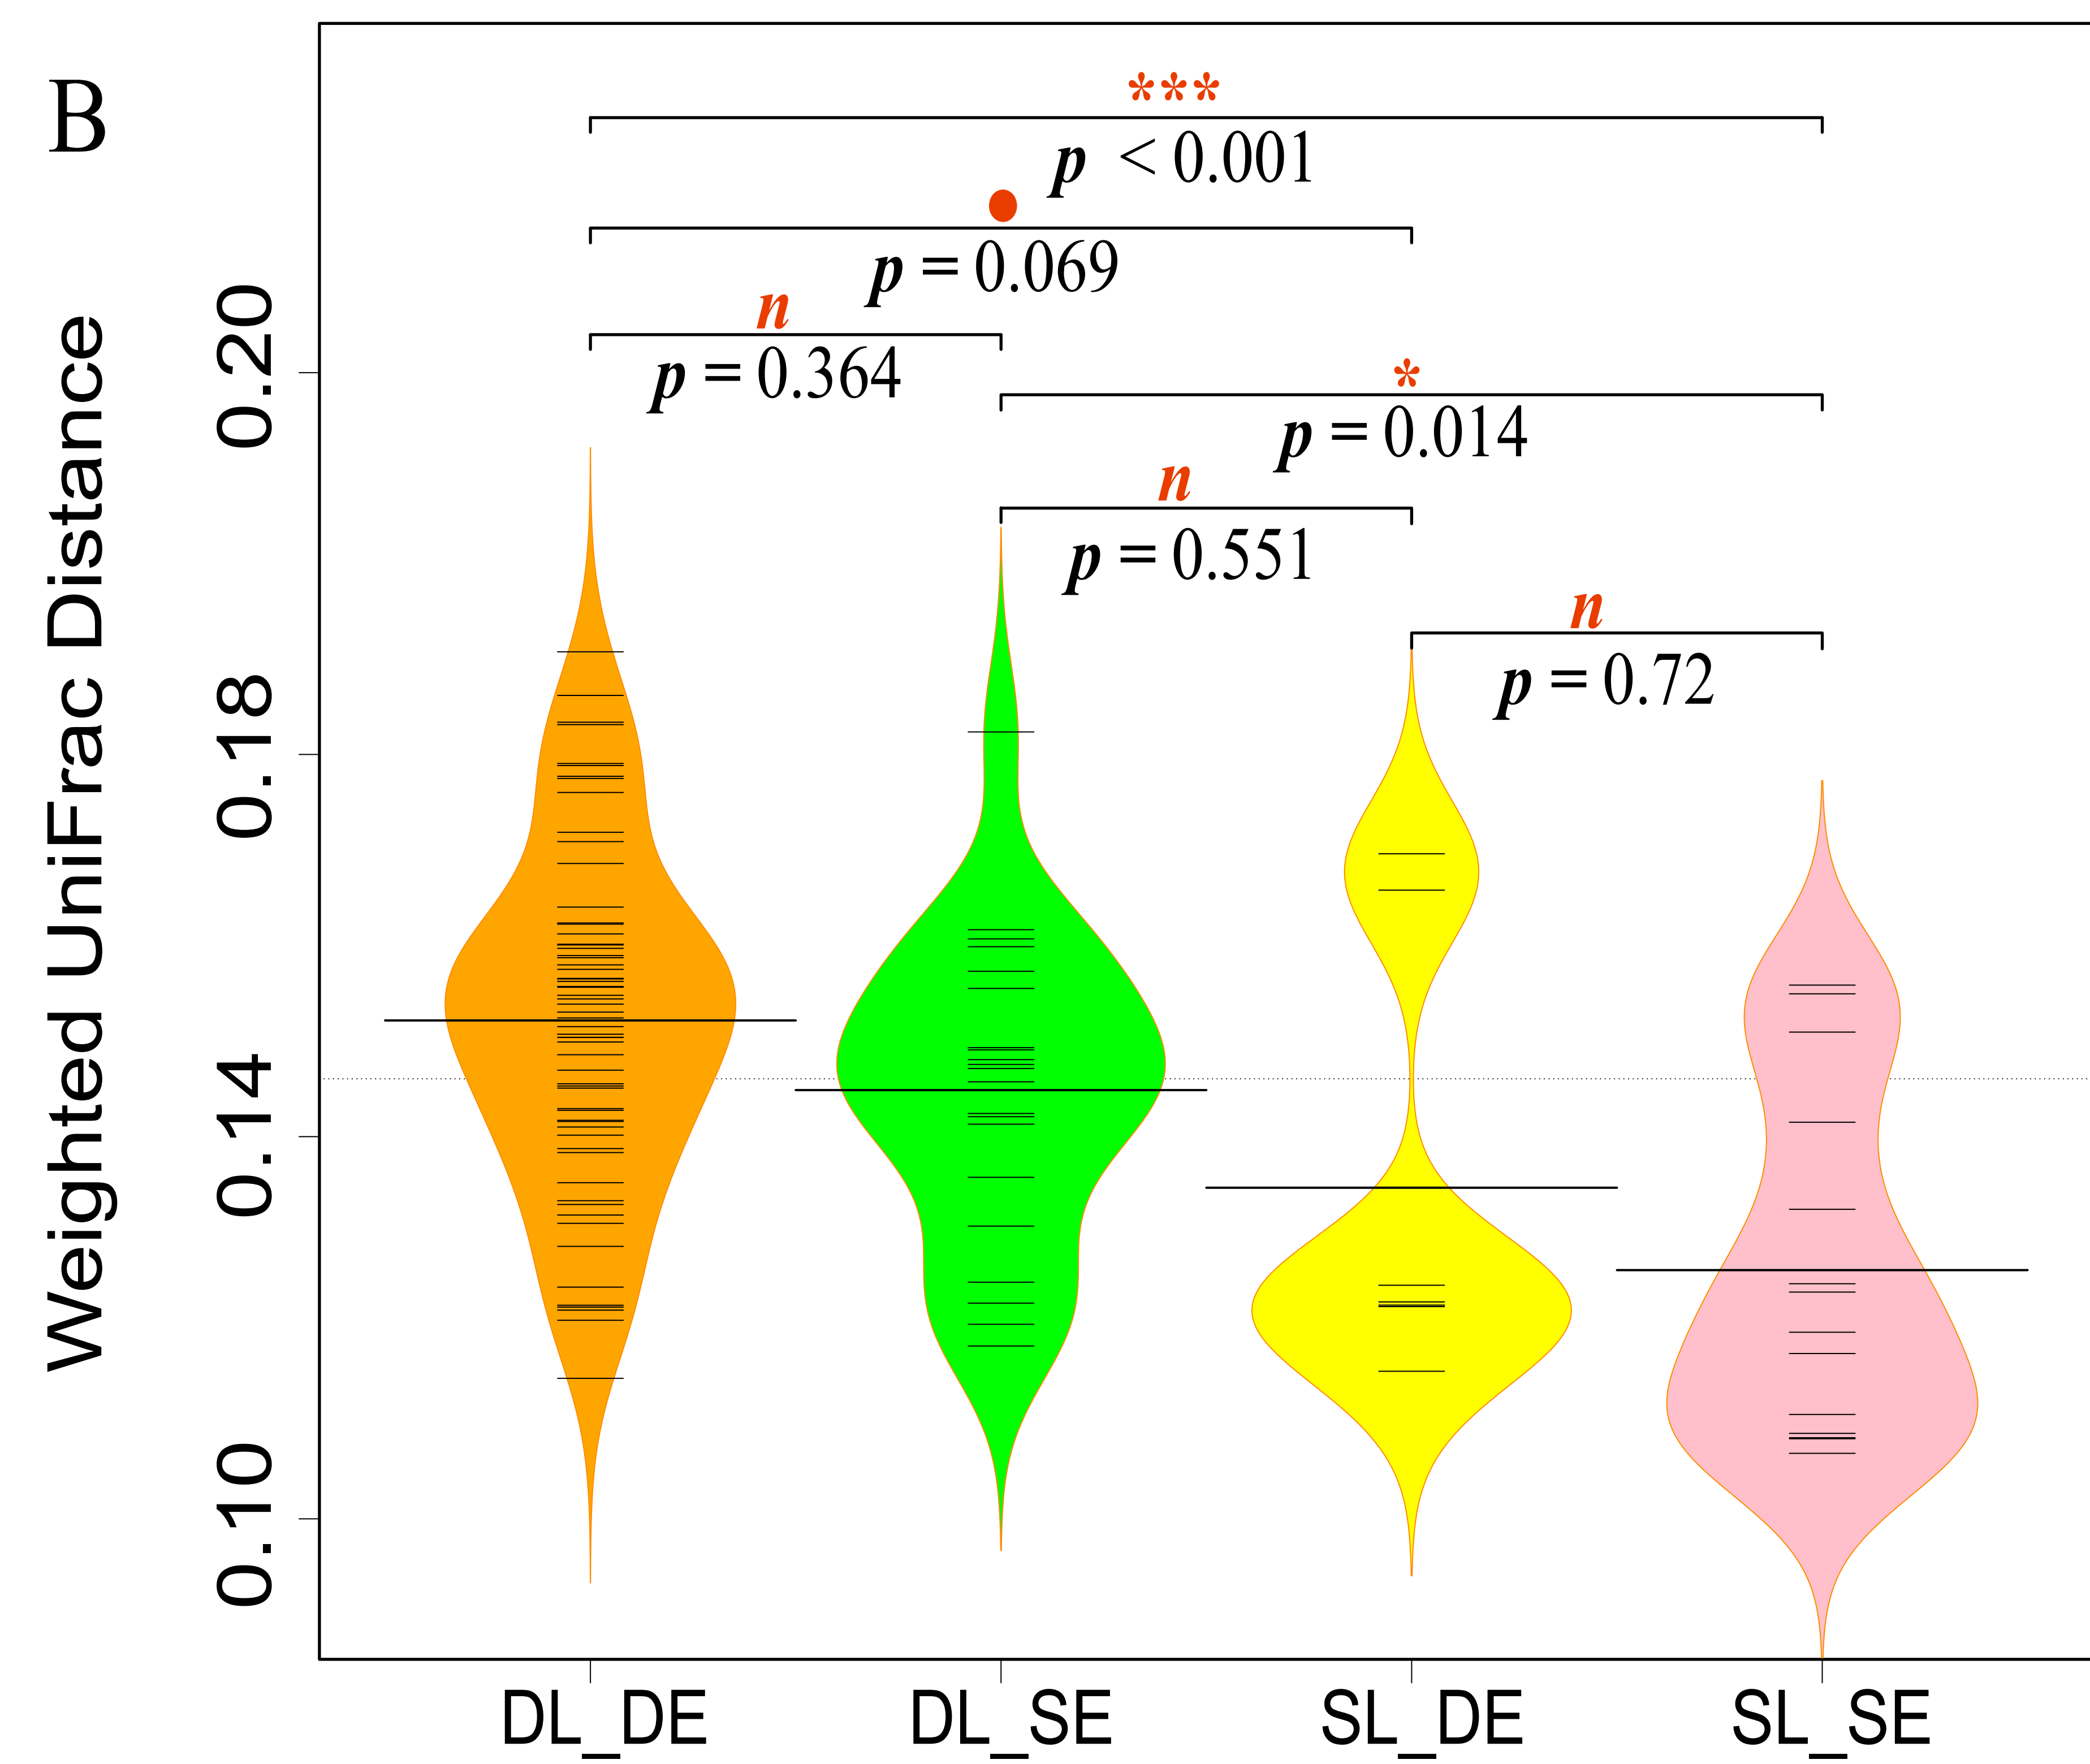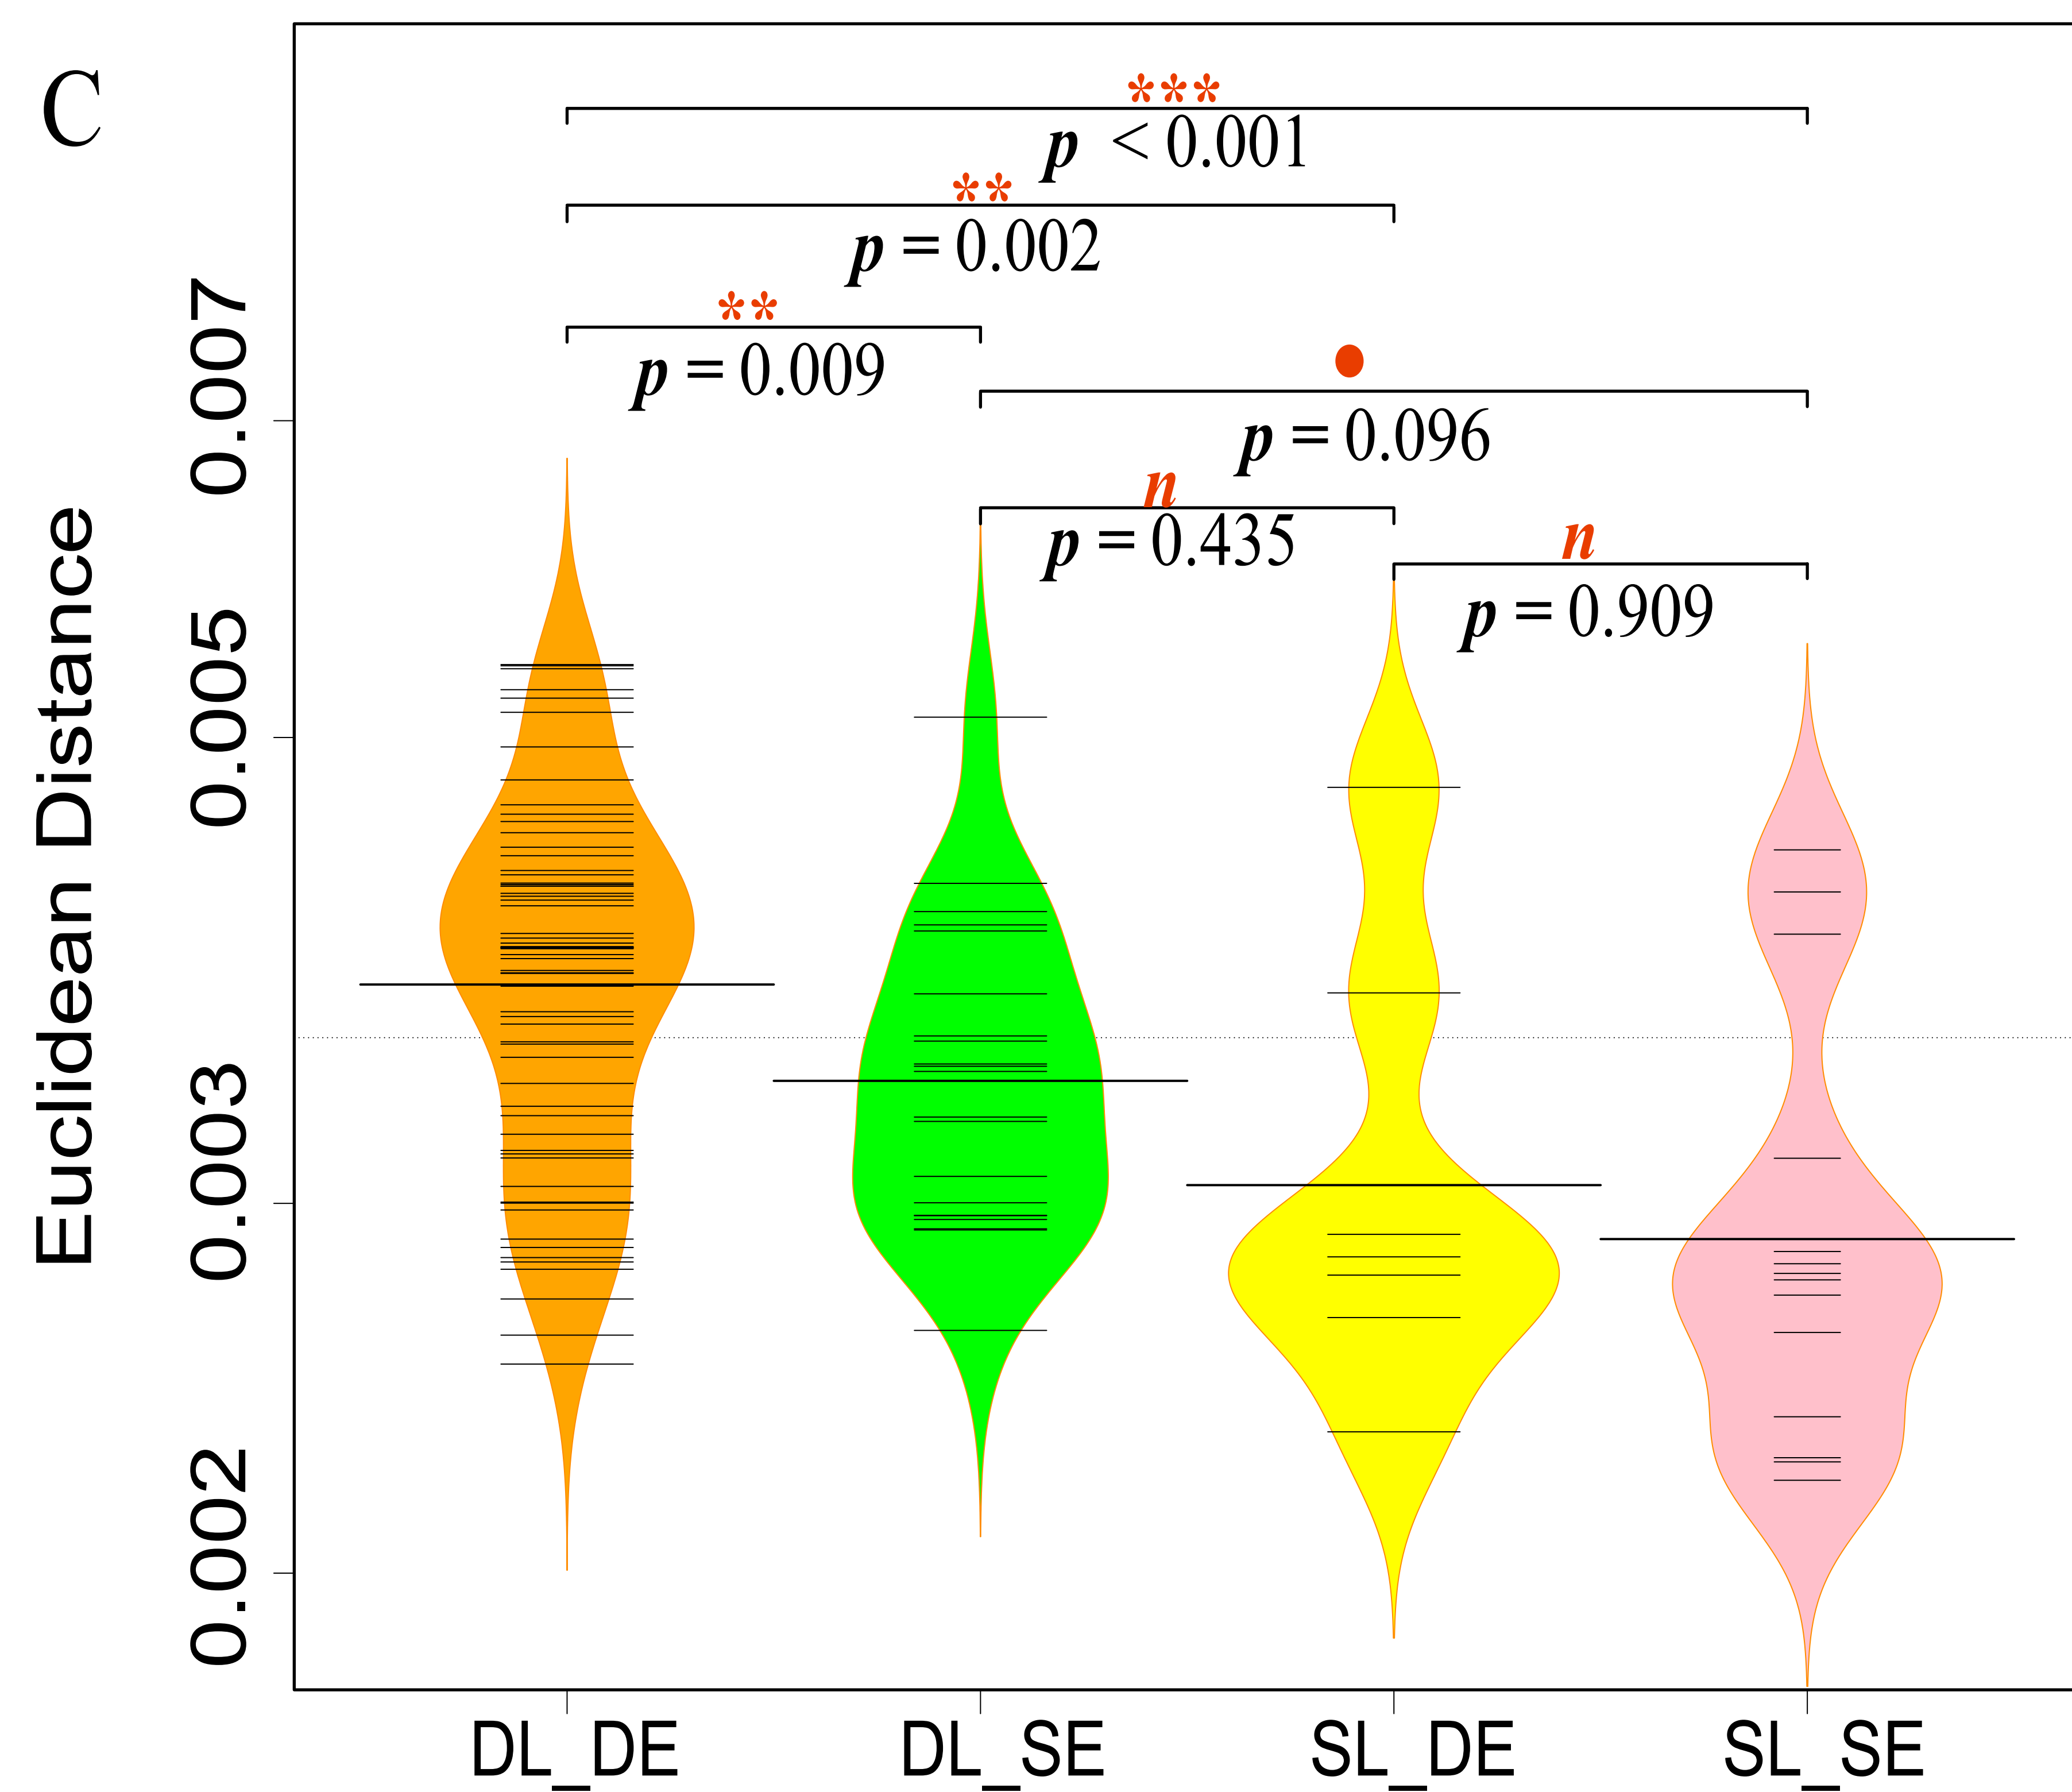

Supplement: s1 [file s1]

A

## Proportion of different enterotypes

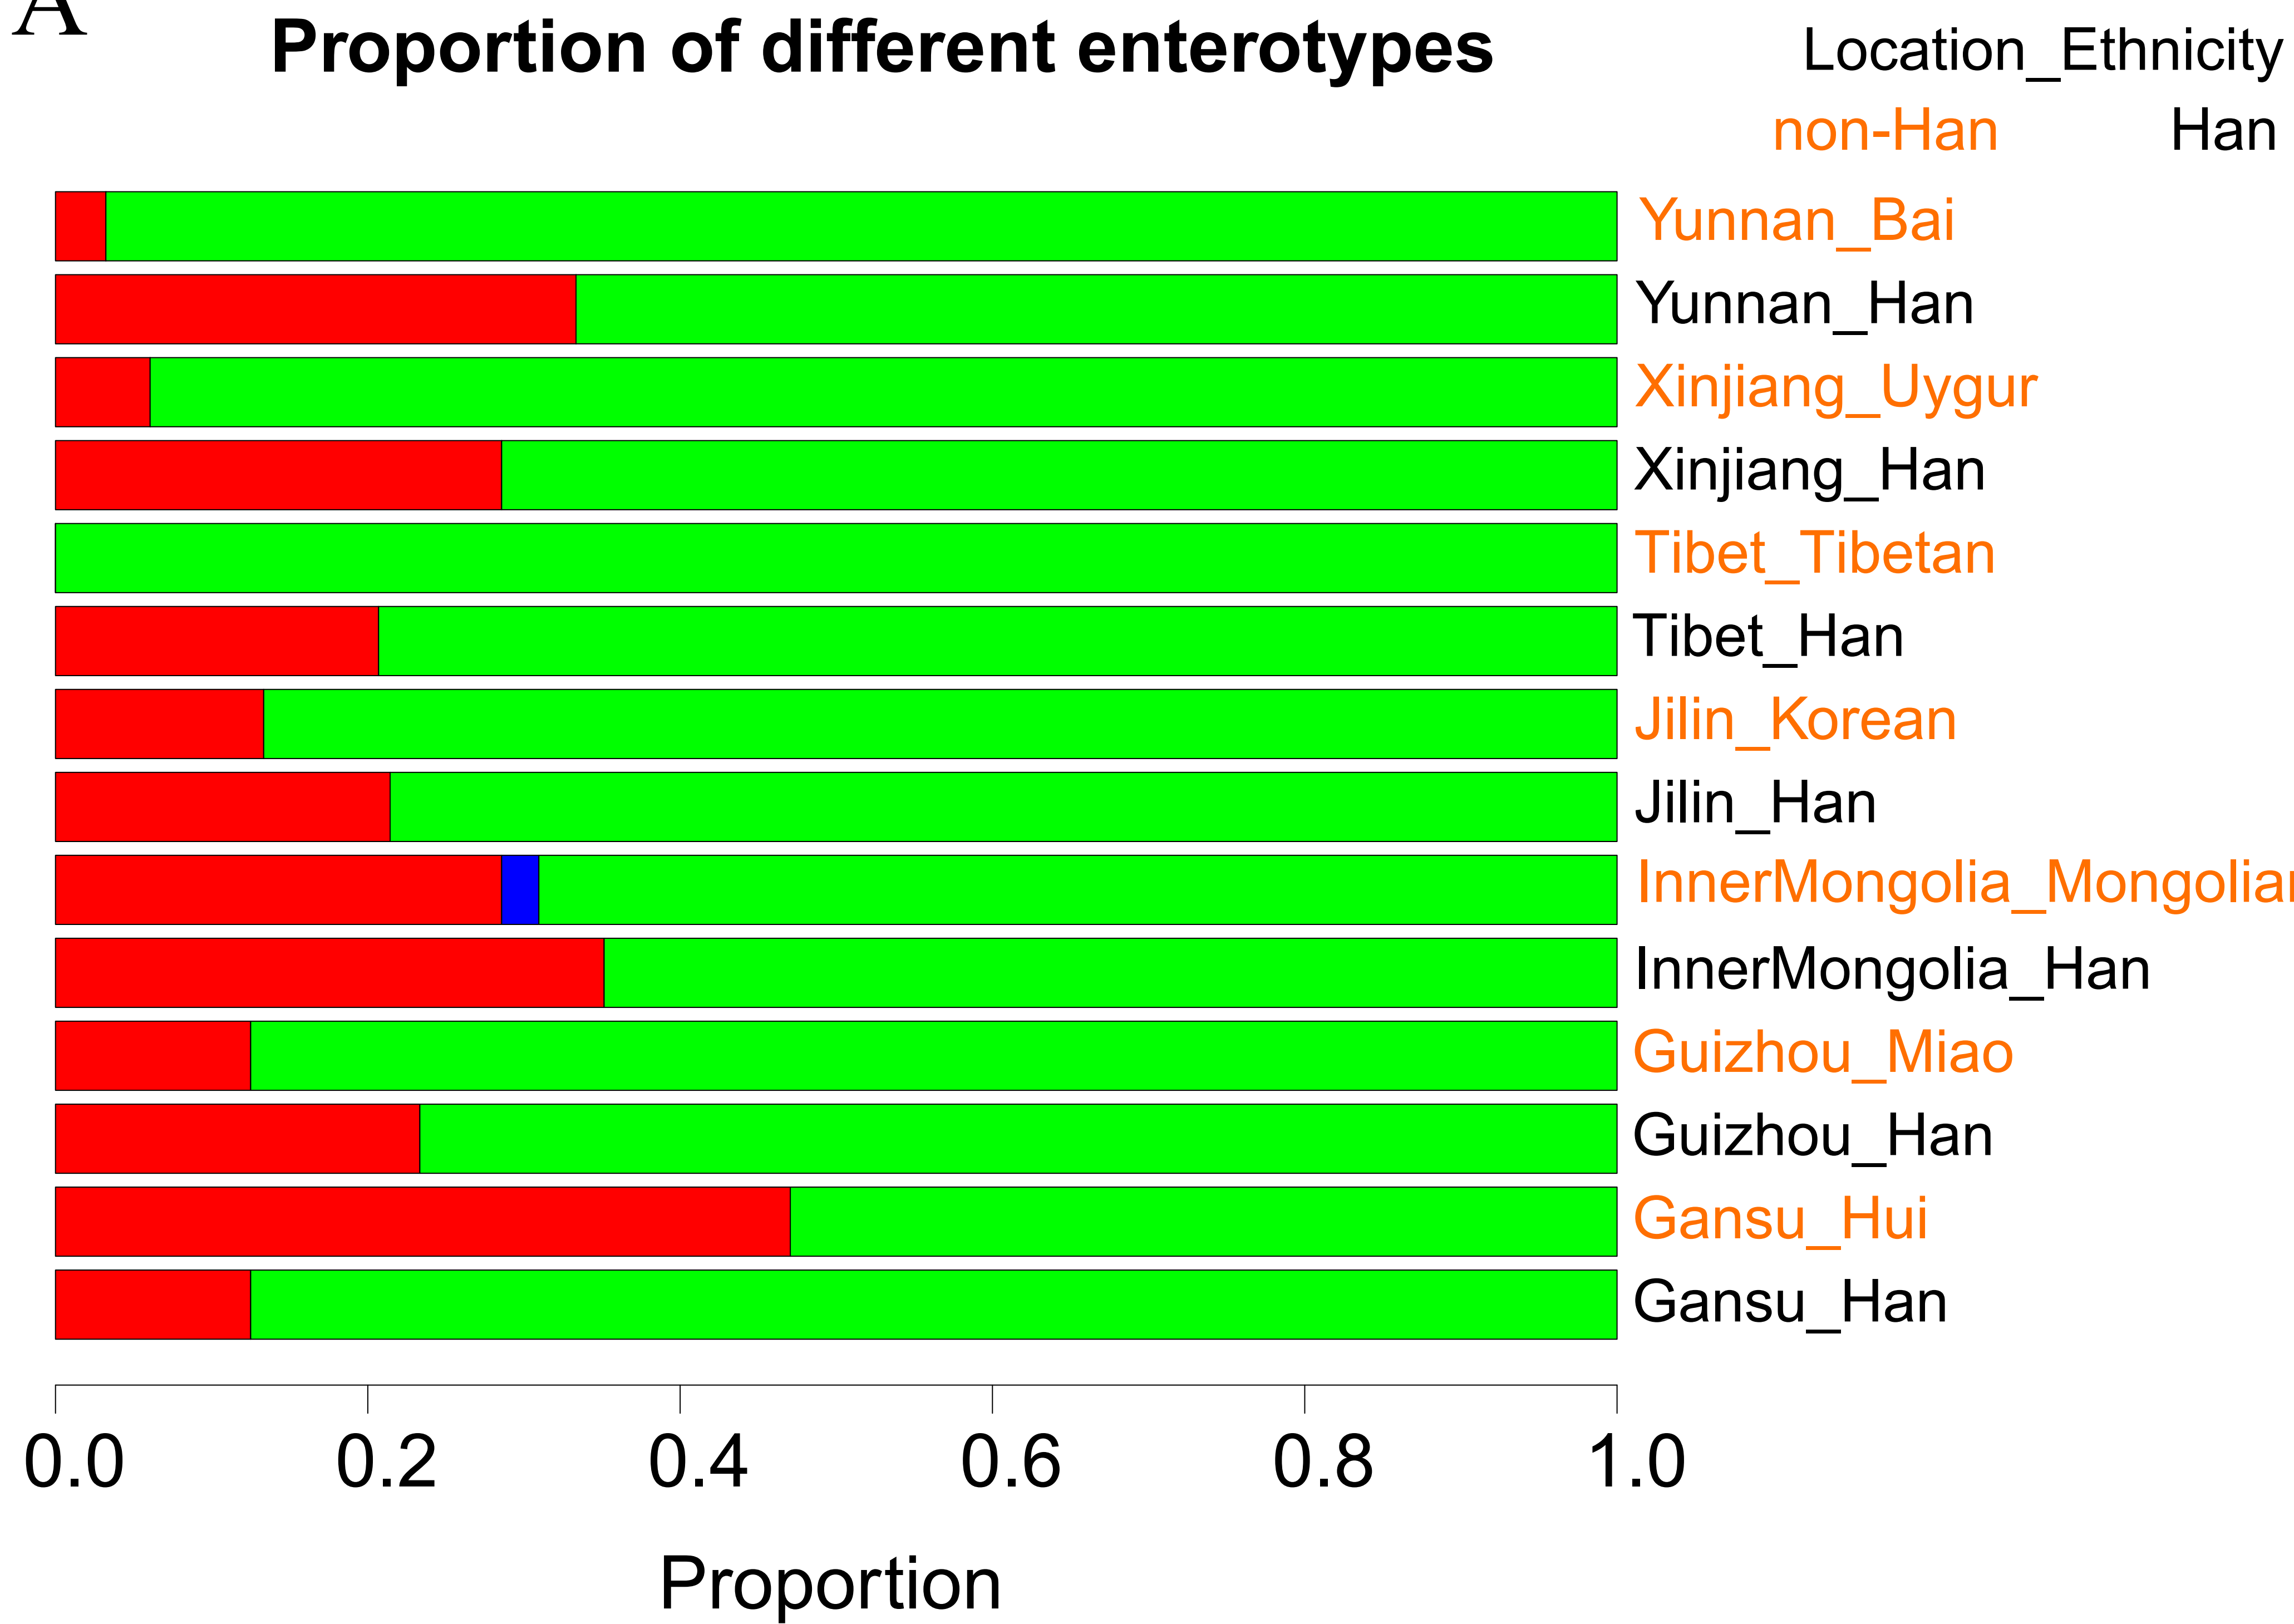

## Frequency of different enterotypes

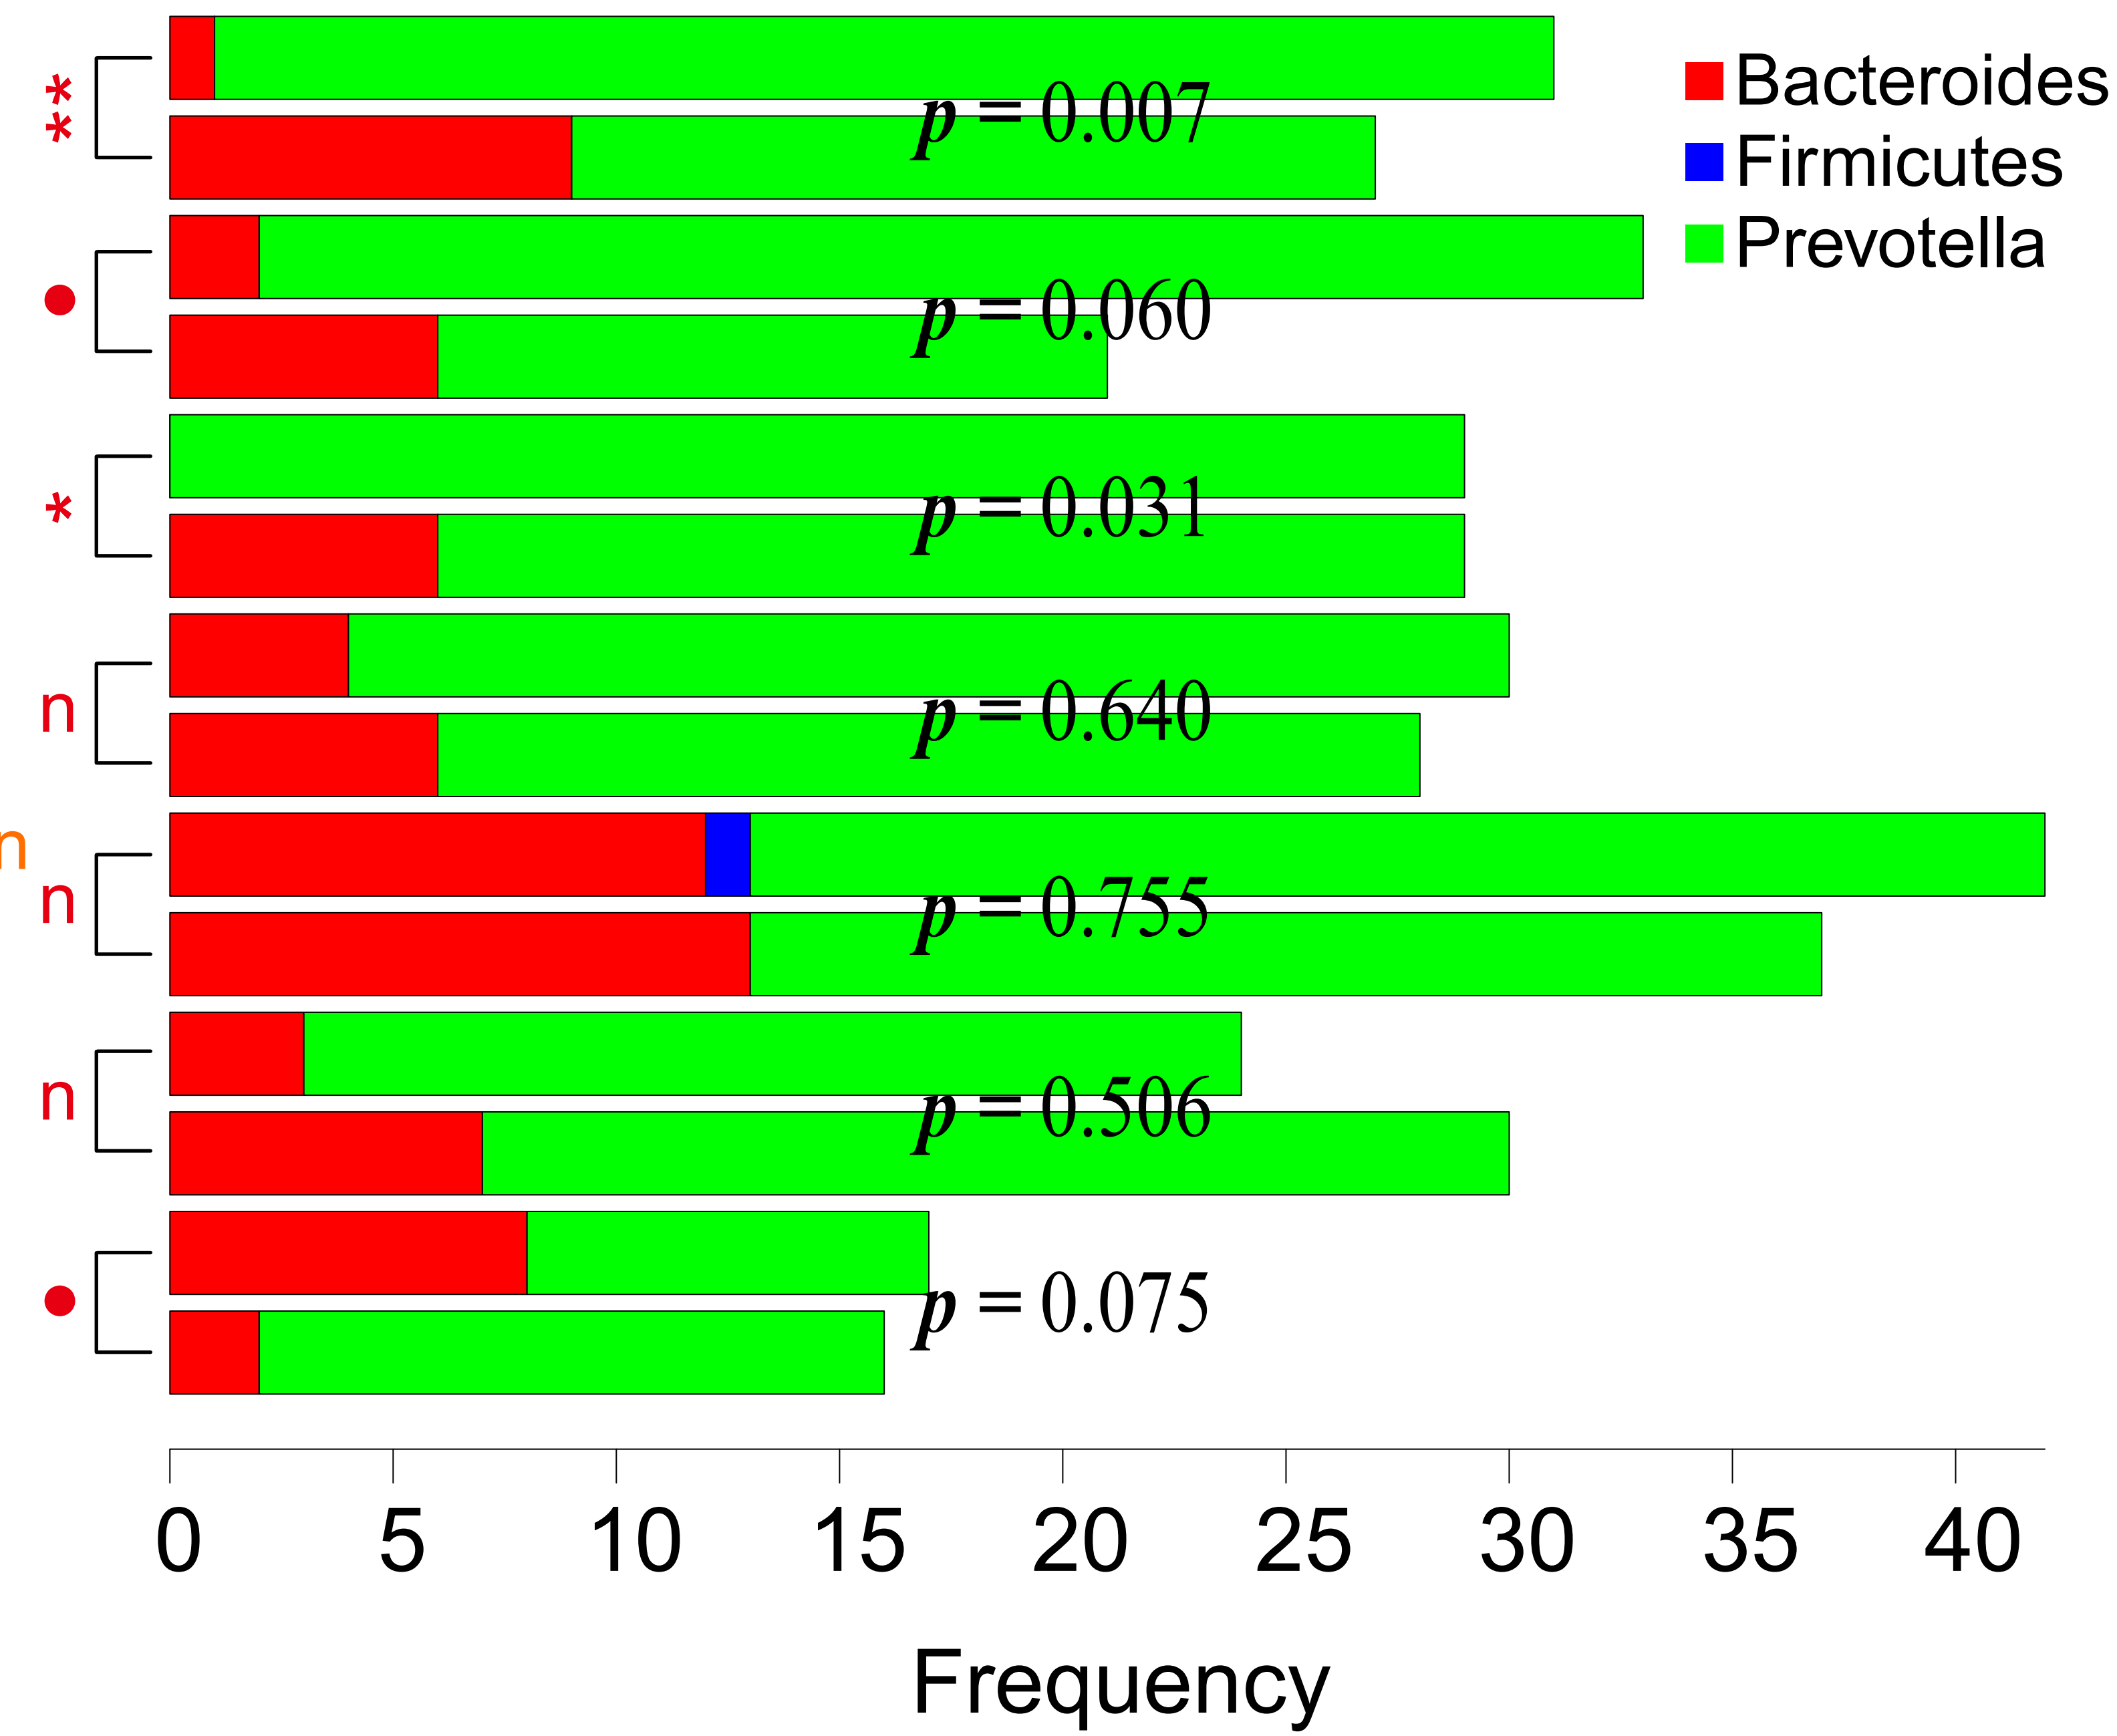

B

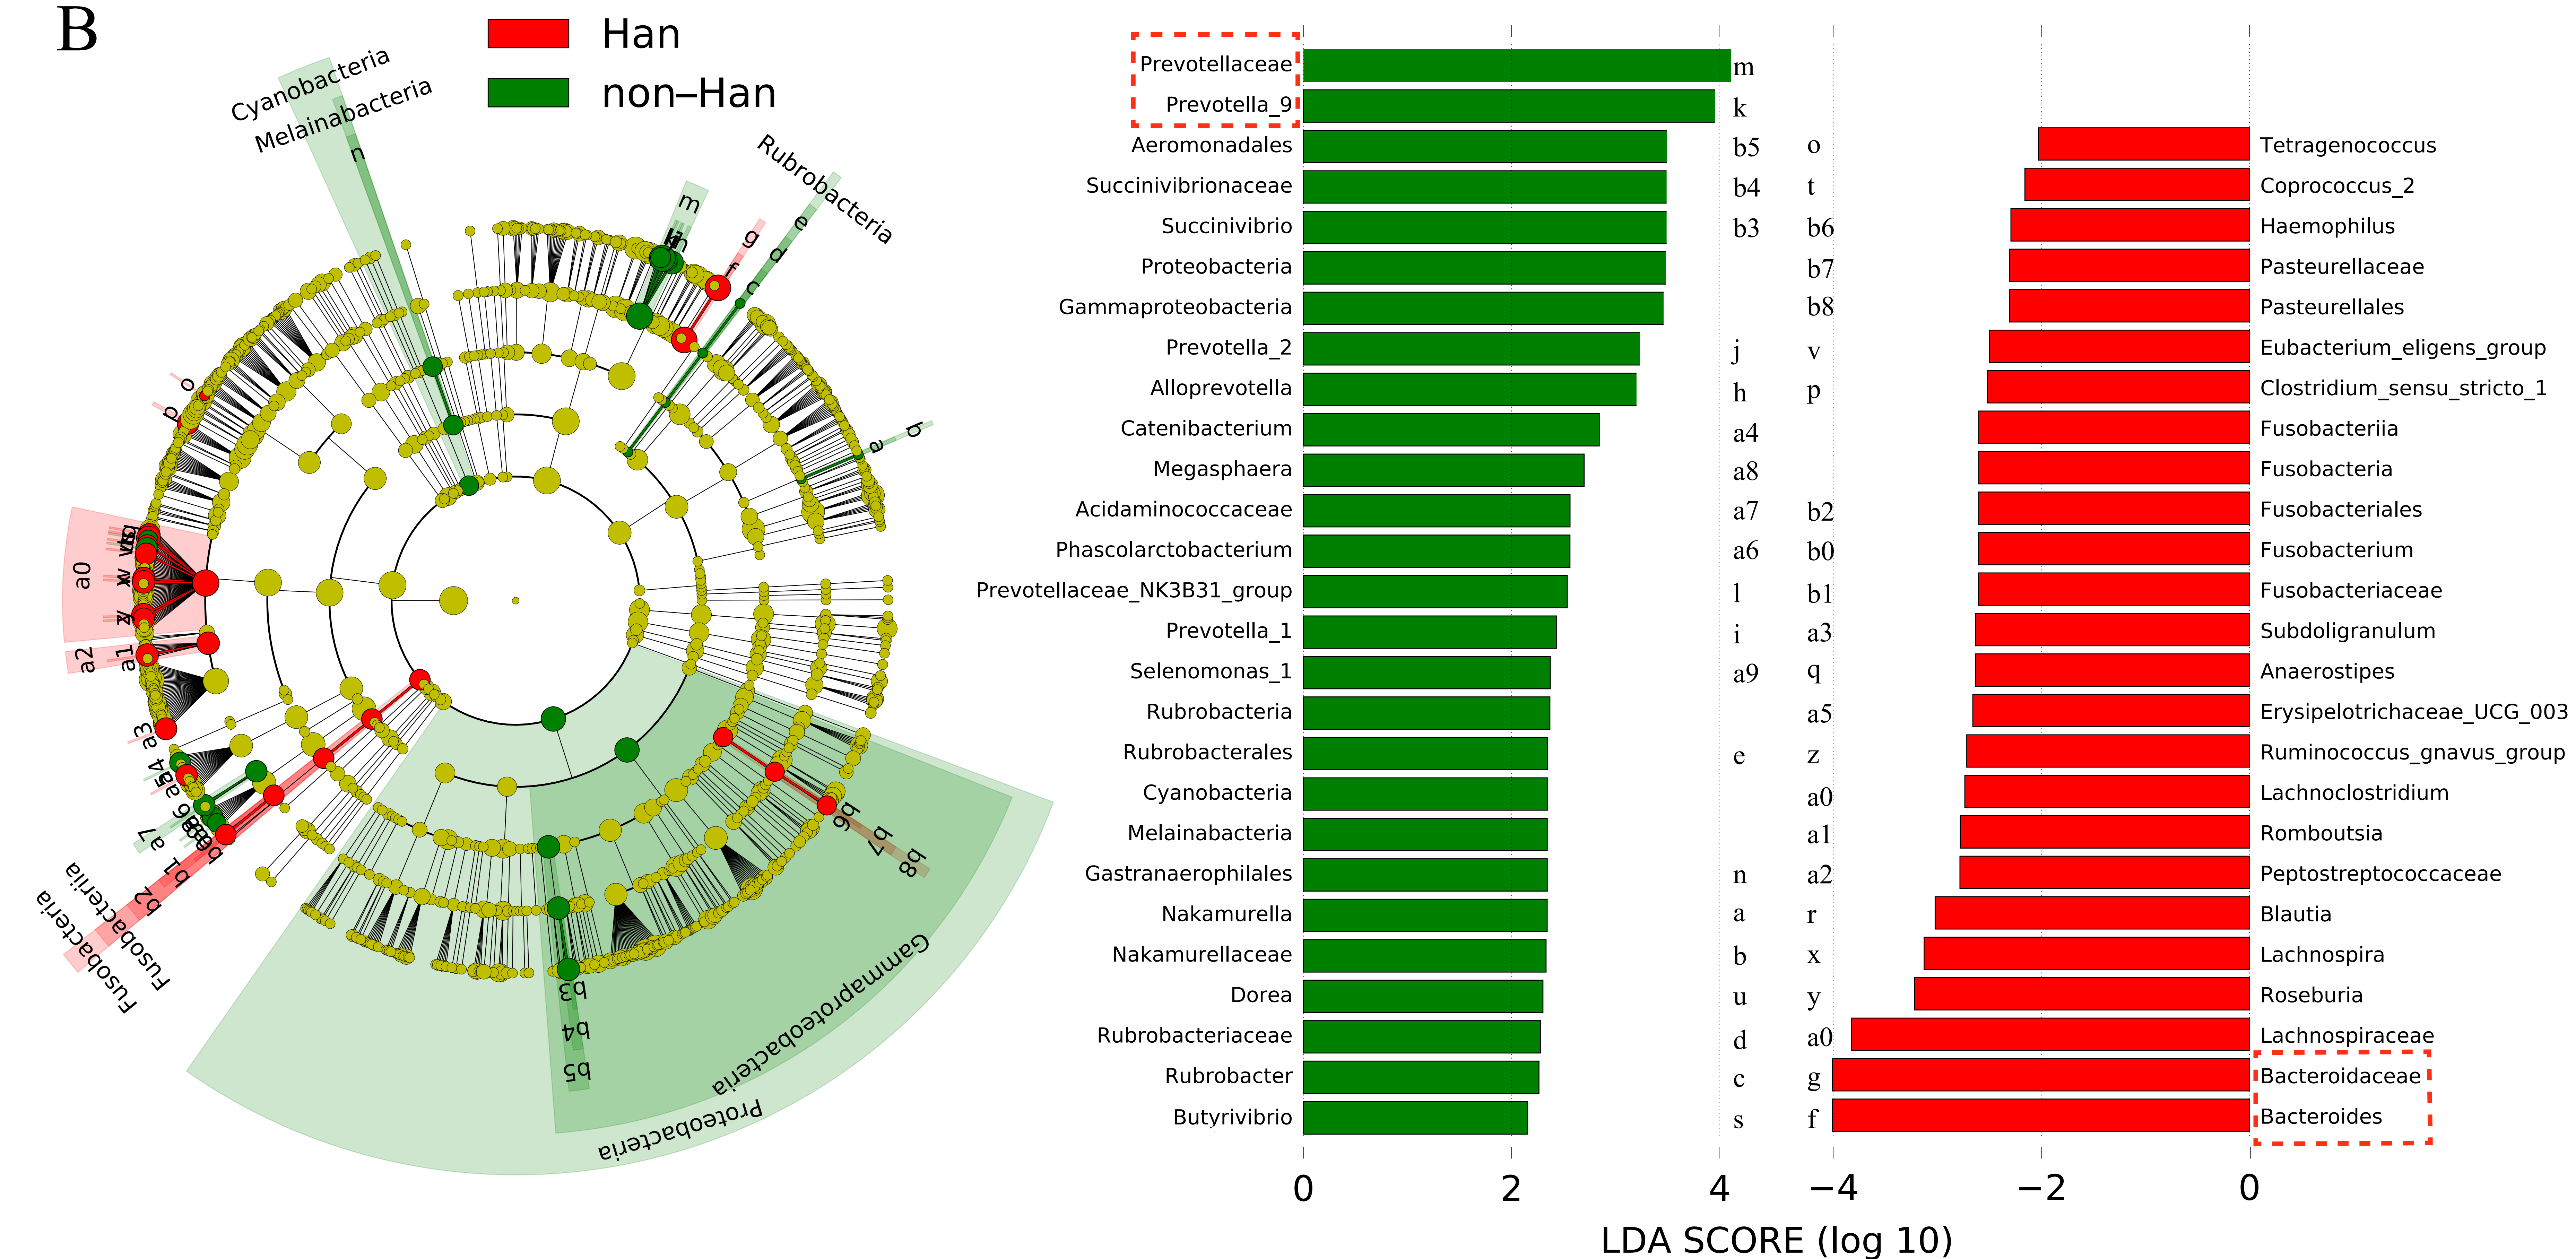

Supplement: s1 [file s1]
